# Supplementary material for: Ilusiones en el Derecho natural burgués
Source: Oxford University Press journal article supplement (doi:10.1158/0008-5472.can-20-2870), 1993-01-01
Supplement: 00085472can202870-sup-249908_4_supp_6908376_q599f5.xlsx [file 00085472can202870-sup-249908_4_supp_6908376_q599f5.xlsx]

## Sheet: TableS2-DE_Ly6gpos_TANvsHLN
Gene	EnsemblID	Description	LFC	FC	P-value	adjusted P-value
Gzme	ENSMUSG00000022156	granzyme E	6.40811	84.9248	5.01625e-06	0.000717512
Muc1	ENSMUSG00000042784	mucin 1, transmembrane	6.38598	83.632	2.17544e-06	0.000490651
Sema4g	ENSMUSG00000025207	sema domain, immunoglobulin domain (Ig), transmembrane domain (TM) and short cytoplasmic domain, (semaphorin) 4G	6.04125	65.8562	1.0794e-07	0.000116899
Krt8	ENSMUSG00000049382	keratin 8	5.95538	62.051	0.000267179	0.00523666
Mcpt2	ENSMUSG00000022226	mast cell protease 2	5.94062	61.4194	2.36493e-05	0.00146955
Gsta4	ENSMUSG00000032348	glutathione S-transferase, alpha 4	5.92573	60.7888	7.06411e-05	0.0025871
Krt18	ENSMUSG00000023043	keratin 18	5.77751	54.8536	0.000177397	0.00423981
S100g	ENSMUSG00000040808	S100 calcium binding protein G	5.73145	53.1296	5.03054e-08	7.90845e-05
Gpr171	ENSMUSG00000050075	G protein-coupled receptor 171	5.69929	51.9585	3.76914e-08	7.90845e-05
Mt1	ENSMUSG00000031765	metallothionein 1	5.62778	49.4458	4.82559e-07	0.000238598
Muc4	ENSMUSG00000079620	mucin 4	5.58725	48.0761	9.85024e-06	0.000995662
Clu	ENSMUSG00000022037	clusterin	5.55108	46.8859	6.31952e-05	0.00244119
Wfdc2	ENSMUSG00000017723	WAP four-disulfide core domain 2	5.52312	45.986	2.24162e-05	0.00140444
Cldn3	ENSMUSG00000070473	claudin 3	5.5121	45.6361	9.60618e-06	0.000995662
Cldn2	ENSMUSG00000047230	claudin 2	5.49418	45.0728	6.54716e-08	8.27234e-05
Mcpt1	ENSMUSG00000022227	mast cell protease 1	5.45079	43.7372	0.000800874	0.0101329
Plpp2	ENSMUSG00000052151	phospholipid phosphatase 2	5.35722	40.9905	2.94747e-06	0.000572942
Sdc1	ENSMUSG00000020592	syndecan 1	5.28991	39.1222	0.000151958	0.00395873
Areg	ENSMUSG00000029378	amphiregulin	5.27176	38.633	6.84916e-05	0.00253285
Tff1	ENSMUSG00000024032	trefoil factor 1	5.16536	35.8863	0.00202334	0.017631
Sytl5	ENSMUSG00000054453	synaptotagmin-like 5	5.11019	34.5399	1.51912e-06	0.000411301
Cfi	ENSMUSG00000058952	complement component factor i	5.10244	34.3548	3.6279e-06	0.000639607
Sdc4	ENSMUSG00000017009	syndecan 4	5.07327	33.6672	3.67069e-05	0.0018714
Rap1gap	ENSMUSG00000041351	Rap1 GTPase-activating protein	5.05902	33.3362	4.3684e-05	0.00204425
Lamb3	ENSMUSG00000026639	laminin, beta 3	5.05392	33.2186	5.91271e-05	0.00232801
Mbip	ENSMUSG00000021028	MAP3K12 binding inhibitory protein 1	4.97868	31.5306	3.51492e-06	0.000634443
Cxcl3	ENSMUSG00000029379	chemokine (C-X-C motif) ligand 3	4.95525	31.0227	9.54684e-05	0.0030984
Grb7	ENSMUSG00000019312	growth factor receptor bound protein 7	4.93077	30.5007	2.7235e-08	7.90845e-05
Lamp3	ENSMUSG00000041247	lysosomal-associated membrane protein 3	4.91053	30.0758	0.00103633	0.0117662
Sdcbp2	ENSMUSG00000027456	syndecan binding protein (syntenin) 2	4.85417	28.9234	5.03571e-07	0.000238598
Tspan11	ENSMUSG00000030351	tetraspanin 11	4.83392	28.5204	8.00704e-05	0.00281775
Tspan8	ENSMUSG00000034127	tetraspanin 8	4.80326	27.9207	8.80093e-06	0.000939717
Scimp	ENSMUSG00000057135	SLP adaptor and CSK interacting membrane protein	4.76531	27.1958	1.8371e-07	0.000140423
Egfl6	ENSMUSG00000000402	EGF-like-domain, multiple 6	4.75381	26.9798	7.14087e-05	0.00260264
Ager	ENSMUSG00000015452	advanced glycosylation end product-specific receptor	4.7523	26.9516	0.000928725	0.0109509
Sftpb	ENSMUSG00000056370	surfactant associated protein B	4.73135	26.563	0.0004788	0.0073329
Spry1	ENSMUSG00000037211	sprouty RTK signaling antagonist 1	4.72855	26.5115	5.47371e-05	0.00228062
Tspan1	ENSMUSG00000028699	tetraspanin 1	4.70991	26.1712	9.3738e-06	0.000986983
Pon3	ENSMUSG00000029759	paraoxonase 3	4.70926	26.1594	0.000142223	0.00373077
Prdx1	ENSMUSG00000028691	peroxiredoxin 1	4.7081	26.1385	9.17205e-05	0.00302319
Foxq1	ENSMUSG00000038415	forkhead box Q1	4.70632	26.1062	0.00021289	0.00457321
S100a14	ENSMUSG00000042306	S100 calcium binding protein A14	4.65178	25.1376	0.000439342	0.0070119
Fkbp4	ENSMUSG00000030357	FK506 binding protein 4	4.62971	24.756	0.000245398	0.005028
St8sia6	ENSMUSG00000003418	ST8 alpha-N-acetyl-neuraminide alpha-2,8-sialyltransferase 6	4.61725	24.5432	7.50667e-05	0.00269181
Lad1	ENSMUSG00000041782	ladinin	4.61458	24.4979	5.8594e-05	0.00232566
Sgsm3	ENSMUSG00000042303	small G protein signaling modulator 3	4.61386	24.4856	4.291e-06	0.000650332
Krt23	ENSMUSG00000006777	keratin 23	4.54363	23.3222	3.02272e-05	0.00166248
Bend7	ENSMUSG00000048186	BEN domain containing 7	4.54155	23.2885	1.08058e-05	0.00103695
Krt20	ENSMUSG00000035775	keratin 20	4.53906	23.2484	0.00256198	0.020085
Dsp	ENSMUSG00000054889	desmoplakin	4.53425	23.171	0.0013278	0.0134573
St14	ENSMUSG00000031995	suppression of tumorigenicity 14 (colon carcinoma)	4.52864	23.0812	4.0609e-05	0.00195587
Ctsh	ENSMUSG00000032359	cathepsin H	4.52348	22.9987	0.00112269	0.0122824
Rpl32	ENSMUSG00000057841	ribosomal protein L32	4.52137	22.9651	0.000106614	0.00318957
Bspry	ENSMUSG00000028392	B-box and SPRY domain containing	4.4742	22.2263	2.94826e-07	0.000186256
Hpn	ENSMUSG00000001249	hepsin	4.46611	22.102	1.12407e-08	7.90845e-05
Apob	ENSMUSG00000020609	apolipoprotein B	4.46136	22.0294	0.00109175	0.0121357
Src	ENSMUSG00000027646	Rous sarcoma oncogene	4.44961	21.8508	3.27489e-05	0.00173615
Ptges	ENSMUSG00000050737	prostaglandin E synthase	4.44017	21.7083	3.264e-05	0.00173615
Nectin2	ENSMUSG00000062300	nectin cell adhesion molecule 2	4.43035	21.561	1.12951e-05	0.00103863
Ivl	ENSMUSG00000049128	involucrin	4.41632	21.3523	0.00472225	0.0276443
Sftpc	ENSMUSG00000022097	surfactant associated protein C	4.41506	21.3336	0.000481577	0.00734575
Sorcs2	ENSMUSG00000029093	sortilin-related VPS10 domain containing receptor 2	4.404	21.1708	5.69942e-05	0.00231055
Gcnt3	ENSMUSG00000032226	glucosaminyl (N-acetyl) transferase 3, mucin type	4.37397	20.7347	0.000211416	0.00457321
Adam28	ENSMUSG00000014725	a disintegrin and metallopeptidase domain 28	4.36966	20.6728	2.03319e-06	0.000481675
Cx3cl1	ENSMUSG00000031778	chemokine (C-X3-C motif) ligand 1	4.3673	20.639	8.02842e-05	0.00281775
Sftpa1	ENSMUSG00000021789	surfactant associated protein A1	4.35395	20.4489	0.00215592	0.0182411
Syt8	ENSMUSG00000031098	synaptotagmin VIII	4.34985	20.3909	0.000237036	0.00486985
Cldn4	ENSMUSG00000047501	claudin 4	4.34586	20.3345	0.00731736	0.0354233
Cdh17	ENSMUSG00000028217	cadherin 17	4.34543	20.3284	0.0011476	0.0123358
Nkx2-1	ENSMUSG00000001496	NK2 homeobox 1	4.33686	20.2081	0.000182807	0.00428938
Ppp1r9a	ENSMUSG00000032827	protein phosphatase 1, regulatory subunit 9A	4.33473	20.1782	0.00113507	0.0123358
Itga2	ENSMUSG00000015533	integrin alpha 2	4.33037	20.1174	0.000811987	0.0101915
Fam213a	ENSMUSG00000021792	family with sequence similarity 213, member A	4.3216	19.9955	0.000118306	0.00339944
Sftpd	ENSMUSG00000021795	surfactant associated protein D	4.31583	19.9157	0.000527732	0.00778353
Mucl3	ENSMUSG00000073408	mucin like 3	4.31134	19.8538	0.000781156	0.0100713
Ssx2ip	ENSMUSG00000036825	synovial sarcoma, X 2 interacting protein	4.30967	19.8308	2.8243e-05	0.00162205
Mfap3l	ENSMUSG00000031647	microfibrillar-associated protein 3-like	4.30078	19.7089	6.56705e-05	0.00245245
Cttn	ENSMUSG00000031078	cortactin	4.29772	19.6672	0.000664634	0.00914445
Tc2n	ENSMUSG00000021187	tandem C2 domains, nuclear	4.29473	19.6265	2.42422e-05	0.00147343
Sh2d4a	ENSMUSG00000053886	SH2 domain containing 4A	4.28525	19.498	1.27758e-05	0.0010499
Pfdn1	ENSMUSG00000024346	prefoldin 1	4.27783	19.3979	5.97373e-07	0.000251594
Itpr3	ENSMUSG00000042644	inositol 1,4,5-triphosphate receptor 3	4.26736	19.2576	0.00236664	0.0193544
Mal	ENSMUSG00000027375	myelin and lymphocyte protein, T cell differentiation protein	4.25979	19.1569	0.000800549	0.0101329
Cblc	ENSMUSG00000040525	Casitas B-lineage lymphoma c	4.23853	18.8766	2.38255e-07	0.000164201
Myo5c	ENSMUSG00000033590	myosin VC	4.23751	18.8632	0.000765401	0.00996372
Atp1b1	ENSMUSG00000026576	ATPase, Na+/K+ transporting, beta 1 polypeptide	4.2328	18.8018	3.9842e-05	0.00195587
Ffar2	ENSMUSG00000051314	free fatty acid receptor 2	4.23203	18.7918	3.02629e-05	0.00166248
Prss8	ENSMUSG00000030800	protease, serine 8 (prostasin)	4.21802	18.6101	2.46275e-06	0.000524564
Mmp14	ENSMUSG00000000957	matrix metallopeptidase 14 (membrane-inserted)	4.21442	18.5638	0.000316305	0.0057093
Bex3	ENSMUSG00000046432	brain expressed X-linked 3	4.21164	18.5281	2.89659e-06	0.000572942
Tanc2	ENSMUSG00000053580	tetratricopeptide repeat, ankyrin repeat and coiled-coil containing 2	4.19749	18.3472	0.000220859	0.00463233
Clip4	ENSMUSG00000024059	CAP-GLY domain containing linker protein family, member 4	4.18802	18.2272	0.000103085	0.00316926
Mrpl52	ENSMUSG00000010406	mitochondrial ribosomal protein L52	4.18635	18.2061	5.54707e-05	0.00228062
Lap3	ENSMUSG00000039682	leucine aminopeptidase 3	4.17311	18.0397	0.000640812	0.00884881
Ikbke	ENSMUSG00000042349	inhibitor of kappaB kinase epsilon	4.16859	17.9833	0.000288756	0.00535222
Magi1	ENSMUSG00000045095	membrane associated guanylate kinase, WW and PDZ domain containing 1	4.16198	17.9012	0.000126431	0.00347189
Met	ENSMUSG00000009376	met proto-oncogene	4.15895	17.8635	0.000103588	0.00316926
Nt5e	ENSMUSG00000032420	5' nucleotidase, ecto	4.14008	17.6315	0.000762319	0.00995863
Acsl4	ENSMUSG00000031278	acyl-CoA synthetase long-chain family member 4	4.13883	17.6162	0.000919081	0.0109209
AA986860	ENSMUSG00000042510	expressed sequence AA986860	4.13442	17.5624	1.05169e-05	0.00102696
Pard6b	ENSMUSG00000044641	par-6 family cell polarity regulator beta	4.11197	17.2912	7.78808e-07	0.00028115
Basp1	ENSMUSG00000045763	brain abundant, membrane attached signal protein 1	4.09969	17.1447	0.0034247	0.0233058
Dlg5	ENSMUSG00000021782	discs large MAGUK scaffold protein 5	4.08793	17.0056	0.0002504	0.00507563
Rps18	ENSMUSG00000008668	ribosomal protein S18	4.08677	16.9919	0.00033337	0.00589109
Tle2	ENSMUSG00000034771	transducin-like enhancer of split 2	4.07851	16.8948	4.75536e-05	0.00212858
Baiap2l1	ENSMUSG00000038859	BAI1-associated protein 2-like 1	4.07578	16.8628	8.52143e-05	0.00289691
Nrn1	ENSMUSG00000039114	neuritin 1	4.07577	16.8628	0.00495221	0.0283047
Serinc2	ENSMUSG00000023232	serine incorporator 2	4.07304	16.8309	7.90409e-06	0.000868419
Fam3c	ENSMUSG00000029672	family with sequence similarity 3, member C	4.07214	16.8204	0.000519805	0.00769657
Kcnk1	ENSMUSG00000033998	potassium channel, subfamily K, member 1	4.06656	16.7555	1.90672e-05	0.00127919
Icam1	ENSMUSG00000037405	intercellular adhesion molecule 1	4.06622	16.7515	0.00368281	0.0242777
Gpd1	ENSMUSG00000023019	glycerol-3-phosphate dehydrogenase 1 (soluble)	4.05275	16.5959	2.98344e-05	0.00166248
Slc25a10	ENSMUSG00000025792	solute carrier family 25 (mitochondrial carrier, dicarboxylate transporter), member 10	4.05267	16.5949	0.000461687	0.00717223
Slc26a9	ENSMUSG00000042268	solute carrier family 26, member 9	4.03843	16.432	0.000447062	0.00707553
Coro2a	ENSMUSG00000028337	coronin, actin binding protein 2A	4.02784	16.3118	0.000588309	0.00827966
Pla2g6	ENSMUSG00000042632	phospholipase A2, group VI	4.02474	16.2768	1.37204e-05	0.00107231
Ereg	ENSMUSG00000029377	epiregulin	4.01388	16.1547	0.00021288	0.00457321
Ctsc	ENSMUSG00000030560	cathepsin C	4.00946	16.1052	0.00247625	0.019844
Ociad2	ENSMUSG00000029153	OCIA domain containing 2	4.0075	16.0834	6.43913e-06	0.000797869
Elf3	ENSMUSG00000003051	E74-like factor 3	4.00221	16.0246	0.000173964	0.00419799
Tpi1	ENSMUSG00000023456	triosephosphate isomerase 1	3.99763	15.9738	0.000472622	0.00732467
Nrk	ENSMUSG00000052854	Nik related kinase	3.99482	15.9427	0.00224599	0.0187913
Ica1	ENSMUSG00000062995	islet cell autoantigen 1	3.99304	15.923	0.000140204	0.00369057
Fam84a	ENSMUSG00000020607	family with sequence similarity 84, member A	3.98487	15.833	0.0019154	0.0170831
Fbp2	ENSMUSG00000021456	fructose bisphosphatase 2	3.98142	15.7953	1.16974e-05	0.00103863
Crb3	ENSMUSG00000044279	crumbs family member 3	3.98104	15.7911	7.62921e-06	0.000863239
Bmp4	ENSMUSG00000021835	bone morphogenetic protein 4	3.98093	15.7899	0.000938832	0.0109509
Spint2	ENSMUSG00000074227	serine protease inhibitor, Kunitz type 2	3.9714	15.6859	0.00133354	0.0134794
Gsto1	ENSMUSG00000025068	glutathione S-transferase omega 1	3.96411	15.6069	0.0103901	0.0434433
Paqr8	ENSMUSG00000025931	progestin and adipoQ receptor family member VIII	3.96091	15.5723	1.62895e-05	0.001165
Atg9b	ENSMUSG00000038295	autophagy related 9B	3.9492	15.4464	1.14492e-05	0.00103863
Clec4n	ENSMUSG00000023349	C-type lectin domain family 4, member n	3.94493	15.4008	0.00470007	0.0276211
Sh3d19	ENSMUSG00000028082	SH3 domain protein D19	3.93605	15.3063	0.00254081	0.0200154
Runx1	ENSMUSG00000022952	runt related transcription factor 1	3.92876	15.2291	0.00311378	0.0220819
Nucb2	ENSMUSG00000030659	nucleobindin 2	3.92444	15.1836	0.000757325	0.00995022
Plekhh2	ENSMUSG00000040852	pleckstrin homology domain containing, family H (with MyTH4 domain) member 2	3.92427	15.1818	0.000326958	0.00580484
Mical2	ENSMUSG00000038244	microtubule associated monooxygenase, calponin and LIM domain containing 2	3.92191	15.157	0.000666543	0.00914711
Cmtm4	ENSMUSG00000096188	CKLF-like MARVEL transmembrane domain containing 4	3.91808	15.1168	0.000286355	0.0053338
Fam162a	ENSMUSG00000003955	family with sequence similarity 162, member A	3.91368	15.0708	2.21745e-05	0.00140087
Nup93	ENSMUSG00000032939	nucleoporin 93	3.90978	15.0301	6.51506e-05	0.00244508
Ranbp1	ENSMUSG00000005732	RAN binding protein 1	3.90874	15.0192	8.72279e-05	0.002939
Dsc2	ENSMUSG00000024331	desmocollin 2	3.88834	14.8083	0.000170835	0.00418651
Cox7b	ENSMUSG00000031231	cytochrome c oxidase subunit 7B	3.88769	14.8017	0.000101749	0.00316926
Chrnb1	ENSMUSG00000041189	cholinergic receptor, nicotinic, beta polypeptide 1 (muscle)	3.88102	14.7334	0.00011462	0.00332925
Hmgn1	ENSMUSG00000040681	high mobility group nucleosomal binding domain 1	3.86594	14.5802	0.000132074	0.00355056
Nectin4	ENSMUSG00000006411	nectin cell adhesion molecule 4	3.86066	14.5269	1.02516e-05	0.0010226
Atp6v0a4	ENSMUSG00000038600	ATPase, H+ transporting, lysosomal V0 subunit A4	3.85982	14.5185	4.53678e-05	0.00209716
Dram1	ENSMUSG00000020057	DNA-damage regulated autophagy modulator 1	3.8582	14.5022	0.00410358	0.0255413
Farp1	ENSMUSG00000025555	FERM, RhoGEF (Arhgef) and pleckstrin domain protein 1 (chondrocyte-derived)	3.85598	14.4799	0.000195143	0.00440292
Emp1	ENSMUSG00000030208	epithelial membrane protein 1	3.8517	14.437	0.00720846	0.0351264
Stk39	ENSMUSG00000027030	serine/threonine kinase 39	3.84345	14.3547	0.000654722	0.00902445
Rab25	ENSMUSG00000008601	RAB25, member RAS oncogene family	3.84082	14.3286	1.8523e-07	0.000140423
Mal2	ENSMUSG00000024479	mal, T cell differentiation protein 2	3.84018	14.3222	0.000518998	0.00769657
Ostc	ENSMUSG00000041084	oligosaccharyltransferase complex subunit (non-catalytic)	3.83727	14.2933	0.000163144	0.00408182
Kctd5	ENSMUSG00000016946	potassium channel tetramerisation domain containing 5	3.82422	14.1646	6.73573e-06	0.000797869
P2ry14	ENSMUSG00000036381	purinergic receptor P2Y, G-protein coupled, 14	3.82142	14.1371	4.01585e-05	0.00195587
Cd63	ENSMUSG00000025351	CD63 antigen	3.81633	14.0873	0.000761909	0.00995863
Appl2	ENSMUSG00000020263	adaptor protein, phosphotyrosine interaction, PH domain and leucine zipper containing 2	3.81557	14.08	0.00072015	0.00962867
Cldn7	ENSMUSG00000018569	claudin 7	3.80067	13.9353	0.000388042	0.00651637
Gan	ENSMUSG00000052557	giant axonal neuropathy	3.79678	13.8978	5.08843e-05	0.00221378
Etl4	ENSMUSG00000036617	enhancer trap locus 4	3.7931	13.8624	0.0028538	0.0212367
Inava	ENSMUSG00000041605	innate immunity activator	3.79263	13.8579	7.52756e-05	0.00269181
Pkp2	ENSMUSG00000041957	plakophilin 2	3.79006	13.8332	1.40349e-05	0.0010857
Tfcp2l1	ENSMUSG00000026380	transcription factor CP2-like 1	3.77936	13.7309	0.00038666	0.00651637
Jak2	ENSMUSG00000024789	Janus kinase 2	3.77589	13.6979	0.0101071	0.0428004
Hdgf	ENSMUSG00000004897	hepatoma-derived growth factor	3.76281	13.5743	0.00136158	0.0136717
AU021092	ENSMUSG00000051669	expressed sequence AU021092	3.76033	13.551	0.0011282	0.0123221
Bcas1	ENSMUSG00000013523	breast carcinoma amplified sequence 1	3.75677	13.5177	0.000159297	0.00403826
Gkn2	ENSMUSG00000030049	gastrokine 2	3.75422	13.4937	0.00293308	0.0215671
Adamdec1	ENSMUSG00000022057	ADAM-like, decysin 1	3.75059	13.4598	2.39579e-05	0.00147343
Mmp12	ENSMUSG00000049723	matrix metallopeptidase 12	3.74705	13.4269	0.000338046	0.00590539
Krt79	ENSMUSG00000061397	keratin 79	3.74506	13.4084	0.00122509	0.0127749
Clic3	ENSMUSG00000015093	chloride intracellular channel 3	3.74378	13.3964	0.000399697	0.00662244
Trpm6	ENSMUSG00000024727	transient receptor potential cation channel, subfamily M, member 6	3.74015	13.3628	0.000454061	0.00712679
Ero1l	ENSMUSG00000021831	ERO1-like (S. cerevisiae)	3.73776	13.3406	0.000880658	0.010613
Gata6	ENSMUSG00000005836	GATA binding protein 6	3.73578	13.3224	0.000189047	0.0043298
Atp5g3	ENSMUSG00000018770	ATP synthase, H+ transporting, mitochondrial F0 complex, subunit C3 (subunit 9)	3.73048	13.2735	3.72749e-05	0.0018714
Slc16a1	ENSMUSG00000032902	solute carrier family 16 (monocarboxylic acid transporters), member 1	3.72416	13.2156	3.51361e-05	0.00183701
Tmprss2	ENSMUSG00000000385	transmembrane protease, serine 2	3.71802	13.1594	0.000421181	0.00683721
Aox3	ENSMUSG00000064294	aldehyde oxidase 3	3.7174	13.1538	0.000849856	0.0104421
Frrs1	ENSMUSG00000033386	ferric-chelate reductase 1	3.71476	13.1297	6.47195e-05	0.00244508
Ptgr1	ENSMUSG00000028378	prostaglandin reductase 1	3.71295	13.1132	5.56543e-05	0.00228062
Proser2	ENSMUSG00000045319	proline and serine rich 2	3.71274	13.1113	1.19212e-05	0.00103879
Lrrc8c	ENSMUSG00000054720	leucine rich repeat containing 8 family, member C	3.70937	13.0808	0.0017364	0.0161517
Hid1	ENSMUSG00000034586	HID1 domain containing	3.70924	13.0795	5.92674e-05	0.00232801
Cd2ap	ENSMUSG00000061665	CD2-associated protein	3.70327	13.0256	0.00544981	0.0298303
Hexb	ENSMUSG00000021665	hexosaminidase B	3.69973	12.9936	0.00121823	0.0127561
Eva1a	ENSMUSG00000035104	eva-1 homolog A (C. elegans)	3.69893	12.9864	0.000257373	0.00516476
Anxa8	ENSMUSG00000021950	annexin A8	3.696	12.9601	6.34367e-05	0.00244119
Zfp512b	ENSMUSG00000000823	zinc finger protein 512B	3.69462	12.9477	0.00019428	0.00439653
H1f0	ENSMUSG00000096210	H1 histone family, member 0	3.69273	12.9307	0.000320937	0.00576655
Liph	ENSMUSG00000044626	lipase, member H	3.67948	12.8125	0.000185273	0.00429555
Lrp6	ENSMUSG00000030201	low density lipoprotein receptor-related protein 6	3.67391	12.7632	0.00310842	0.0220645
Cebpa	ENSMUSG00000034957	CCAAT/enhancer binding protein (C/EBP), alpha	3.67344	12.7589	0.00382848	0.0247854
Slit2	ENSMUSG00000031558	slit guidance ligand 2	3.673	12.7551	0.000567565	0.00811832
Igsf9	ENSMUSG00000037995	immunoglobulin superfamily, member 9	3.67139	12.7408	0.000154204	0.00398099
Bok	ENSMUSG00000026278	BCL2-related ovarian killer	3.67005	12.729	0.00268084	0.0204869
Jpt2	ENSMUSG00000024165	Jupiter microtubule associated homolog 2	3.66579	12.6915	4.87166e-06	0.000710232
Xbp1	ENSMUSG00000020484	X-box binding protein 1	3.66519	12.6862	0.00599462	0.0315811
Creb5	ENSMUSG00000053007	cAMP responsive element binding protein 5	3.66509	12.6853	0.000120848	0.00341847
Eps8l3	ENSMUSG00000040600	EPS8-like 3	3.66267	12.6641	0.000131199	0.00353957
Pdia6	ENSMUSG00000020571	protein disulfide isomerase associated 6	3.66141	12.653	0.00263831	0.0204285
Col18a1	ENSMUSG00000001435	collagen, type XVIII, alpha 1	3.65836	12.6263	0.0050246	0.0285116
Mcm7	ENSMUSG00000029730	minichromosome maintenance complex component 7	3.65788	12.6221	4.61623e-05	0.00210968
F3	ENSMUSG00000028128	coagulation factor III	3.65588	12.6046	0.00282836	0.0212038
Selenbp1	ENSMUSG00000068874	selenium binding protein 1	3.65481	12.5952	0.00735766	0.0355957
Aprt	ENSMUSG00000006589	adenine phosphoribosyl transferase	3.65356	12.5843	0.000284546	0.00531787
Aco1	ENSMUSG00000028405	aconitase 1	3.65211	12.5718	0.000973806	0.0112881
Hif3a	ENSMUSG00000004328	hypoxia inducible factor 3, alpha subunit	3.6521	12.5716	0.000104373	0.00316926
Slc34a2	ENSMUSG00000029188	solute carrier family 34 (sodium phosphate), member 2	3.64412	12.5023	0.00120063	0.0126241
Dlg3	ENSMUSG00000000881	discs large MAGUK scaffold protein 3	3.64336	12.4957	0.000342797	0.00596042
Rpl10a	ENSMUSG00000037805	ribosomal protein L10A	3.64198	12.4837	0.00111593	0.0122668
Prdx2	ENSMUSG00000005161	peroxiredoxin 2	3.64113	12.4764	0.000257523	0.00516476
C1qa	ENSMUSG00000036887	complement component 1, q subcomponent, alpha polypeptide	3.63899	12.4579	0.00484026	0.0280321
Angptl4	ENSMUSG00000002289	angiopoietin-like 4	3.63744	12.4445	0.000222998	0.0046568
Inf2	ENSMUSG00000037679	inverted formin, FH2 and WH2 domain containing	3.63501	12.4236	0.00178026	0.0163589
Abcc3	ENSMUSG00000020865	ATP-binding cassette, sub-family C (CFTR/MRP), member 3	3.63068	12.3864	0.00167398	0.0158631
F2r	ENSMUSG00000048376	coagulation factor II (thrombin) receptor	3.62504	12.3381	0.00825738	0.038287
Pum3	ENSMUSG00000041360	pumilio RNA-binding family member 3	3.62464	12.3346	0.000217959	0.00461549
Rhobtb2	ENSMUSG00000022075	Rho-related BTB domain containing 2	3.61598	12.2608	0.000157089	0.00399629
Irx3	ENSMUSG00000031734	Iroquois related homeobox 3	3.61275	12.2333	0.000290077	0.0053636
Mllt6	ENSMUSG00000038437	myeloid/lymphoid or mixed-lineage leukemia; translocated to, 6	3.61201	12.2271	0.00253267	0.0200154
Rbpj	ENSMUSG00000039191	recombination signal binding protein for immunoglobulin kappa J region	3.60551	12.1721	0.00104957	0.0118451
Krt7	ENSMUSG00000023039	keratin 7	3.58885	12.0324	0.000182643	0.00428938
Polr1c	ENSMUSG00000067148	polymerase (RNA) I polypeptide C	3.58869	12.031	4.80816e-05	0.00213162
B3gnt3	ENSMUSG00000031803	UDP-GlcNAc:betaGal beta-1,3-N-acetylglucosaminyltransferase 3	3.5878	12.0236	0.000129691	0.00352398
Rps19	ENSMUSG00000040952	ribosomal protein S19	3.58692	12.0163	0.00184346	0.0168174
Dpp4	ENSMUSG00000035000	dipeptidylpeptidase 4	3.58428	11.9943	0.00415163	0.0257002
Sox4	ENSMUSG00000076431	SRY (sex determining region Y)-box 4	3.57851	11.9465	0.00257204	0.020085
Ptprn	ENSMUSG00000026204	protein tyrosine phosphatase, receptor type, N	3.56598	11.8431	0.000336402	0.00590339
Hbegf	ENSMUSG00000024486	heparin-binding EGF-like growth factor	3.56551	11.8393	3.15777e-06	0.000598477
Bcam	ENSMUSG00000002980	basal cell adhesion molecule	3.56508	11.8358	0.00671966	0.0335638
Ankrd10	ENSMUSG00000031508	ankyrin repeat domain 10	3.56338	11.8218	0.000188192	0.0043298
Ppic	ENSMUSG00000024538	peptidylprolyl isomerase C	3.55357	11.7417	0.000530813	0.00778355
Cldn18	ENSMUSG00000032473	claudin 18	3.55353	11.7414	0.0063574	0.0325865
Foxa1	ENSMUSG00000035451	forkhead box A1	3.54613	11.6813	0.000224114	0.0046568
Tceal9	ENSMUSG00000042712	transcription elongation factor A like 9	3.54321	11.6577	0.0023073	0.019008
Trmt1	ENSMUSG00000001909	tRNA methyltransferase 1	3.54118	11.6413	0.000284798	0.00531787
Bcl2l14	ENSMUSG00000030200	BCL2-like 14 (apoptosis facilitator)	3.5341	11.5843	0.000530203	0.00778355
Tns4	ENSMUSG00000017607	tensin 4	3.53371	11.5812	0.00094749	0.0110167
Nop58	ENSMUSG00000026020	NOP58 ribonucleoprotein	3.53237	11.5704	0.000506914	0.0075947
Nans	ENSMUSG00000028334	N-acetylneuraminic acid synthase (sialic acid synthase)	3.53222	11.5692	0.000379138	0.00648814
Rps3a1	ENSMUSG00000028081	ribosomal protein S3A1	3.53087	11.5584	0.00640335	0.0326557
Il33	ENSMUSG00000024810	interleukin 33	3.52844	11.5389	0.000805979	0.0101329
Nlrc4	ENSMUSG00000039193	NLR family, CARD domain containing 4	3.52764	11.5326	3.12673e-05	0.00168112
Tnfrsf12a	ENSMUSG00000023905	tumor necrosis factor receptor superfamily, member 12a	3.52322	11.4972	0.000536902	0.00782741
Vsig2	ENSMUSG00000001943	V-set and immunoglobulin domain containing 2	3.52264	11.4926	0.000182265	0.00428938
Sox9	ENSMUSG00000000567	SRY (sex determining region Y)-box 9	3.5205	11.4756	0.00152426	0.014891
Acadl	ENSMUSG00000026003	acyl-Coenzyme A dehydrogenase, long-chain	3.51703	11.4481	0.00147165	0.014489
Ssrp1	ENSMUSG00000027067	structure specific recognition protein 1	3.5165	11.4438	0.00265262	0.0204382
Dad1	ENSMUSG00000022174	defender against cell death 1	3.51473	11.4298	0.000269328	0.00523666
Lsr	ENSMUSG00000001247	lipolysis stimulated lipoprotein receptor	3.5131	11.4169	0.000805414	0.0101329
Capn5	ENSMUSG00000035547	calpain 5	3.51237	11.4111	0.0023058	0.019008
Ms4a7	ENSMUSG00000024672	membrane-spanning 4-domains, subfamily A, member 7	3.51085	11.3991	0.00396578	0.0251376
Nckap5l	ENSMUSG00000023009	NCK-associated protein 5-like	3.5087	11.3821	0.000190853	0.00435208
Sinhcaf	ENSMUSG00000039985	SIN3-HDAC complex associated factor	3.50629	11.3631	0.000118803	0.00339944
Gstm1	ENSMUSG00000058135	glutathione S-transferase, mu 1	3.49136	11.2461	0.0103322	0.0433743
Akr1c19	ENSMUSG00000071551	aldo-keto reductase family 1, member C19	3.48814	11.2211	0.000105311	0.00318073
Myo1e	ENSMUSG00000032220	myosin IE	3.48411	11.1898	0.00236347	0.0193544
Ndufv1	ENSMUSG00000037916	NADH:ubiquinone oxidoreductase core subunit V1	3.48123	11.1675	0.000262707	0.00521356
B4galt1	ENSMUSG00000028413	UDP-Gal:betaGlcNAc beta 1,4- galactosyltransferase, polypeptide 1	3.47739	11.1378	0.00512177	0.0288018
Fnbp1l	ENSMUSG00000039735	formin binding protein 1-like	3.47463	11.1165	0.00332184	0.022998
Fcgr2b	ENSMUSG00000026656	Fc receptor, IgG, low affinity IIb	3.47335	11.1067	0.00160671	0.0154123
Camsap3	ENSMUSG00000044433	calmodulin regulated spectrin-associated protein family, member 3	3.4706	11.0855	0.00062344	0.0086721
Cacnb3	ENSMUSG00000003352	calcium channel, voltage-dependent, beta 3 subunit	3.47021	11.0825	5.23857e-05	0.002216
Rgcc	ENSMUSG00000022018	regulator of cell cycle	3.46659	11.0547	0.00206527	0.0177919
Herc3	ENSMUSG00000029804	hect domain and RLD 3	3.46284	11.026	0.00104862	0.0118451
Fbxl17	ENSMUSG00000023965	F-box and leucine-rich repeat protein 17	3.46172	11.0175	6.22921e-05	0.00242172
Pigq	ENSMUSG00000025728	phosphatidylinositol glycan anchor biosynthesis, class Q	3.46106	11.0124	2.42948e-05	0.00147343
Lgi3	ENSMUSG00000033595	leucine-rich repeat LGI family, member 3	3.46012	11.0052	0.000381628	0.00650492
Kifc3	ENSMUSG00000031788	kinesin family member C3	3.45513	10.9673	0.000275933	0.00528733
Rnf128	ENSMUSG00000031438	ring finger protein 128	3.45458	10.9631	0.000136332	0.00363887
Cse1l	ENSMUSG00000002718	chromosome segregation 1-like (S. cerevisiae)	3.4536	10.9556	0.000374656	0.00644255
Pgm2	ENSMUSG00000025791	phosphoglucomutase 2	3.45304	10.9514	0.000326898	0.00580484
Dhx35	ENSMUSG00000027655	DEAH (Asp-Glu-Ala-His) box polypeptide 35	3.45244	10.9468	0.000247291	0.00504488
Gipc1	ENSMUSG00000019433	GIPC PDZ domain containing family, member 1	3.45234	10.9461	0.000232298	0.00478546
Pvr	ENSMUSG00000040511	poliovirus receptor	3.44766	10.9106	0.000174432	0.00419799
Anxa3	ENSMUSG00000029484	annexin A3	3.44754	10.9097	0.000444189	0.00704477
Tnfrsf13b	ENSMUSG00000010142	tumor necrosis factor receptor superfamily, member 13b	3.4462	10.8996	0.000710739	0.00957037
Psmd7	ENSMUSG00000039067	proteasome (prosome, macropain) 26S subunit, non-ATPase, 7	3.446	10.8981	0.00186251	0.0168954
Gpr39	ENSMUSG00000026343	G protein-coupled receptor 39	3.44535	10.8931	9.93916e-05	0.00316808
Ndufv3	ENSMUSG00000024038	NADH:ubiquinone oxidoreductase core subunit V3	3.44525	10.8924	0.000321447	0.00576655
Grb14	ENSMUSG00000026888	growth factor receptor bound protein 14	3.43855	10.8419	0.000324337	0.00579905
Inhba	ENSMUSG00000041324	inhibin beta-A	3.4376	10.8348	0.0027839	0.020958
Cybrd1	ENSMUSG00000027015	cytochrome b reductase 1	3.43652	10.8267	0.00102485	0.0117009
Zfp57	ENSMUSG00000036036	zinc finger protein 57	3.43599	10.8227	0.000321758	0.00576655
Gja1	ENSMUSG00000050953	gap junction protein, alpha 1	3.4334	10.8033	0.00134848	0.0135942
Rif1	ENSMUSG00000036202	replication timing regulatory factor 1	3.43315	10.8014	0.00170694	0.0160076
Tmem245	ENSMUSG00000055296	transmembrane protein 245	3.42943	10.7736	0.00441346	0.026724
Bcl2a1b	ENSMUSG00000089929	B cell leukemia/lymphoma 2 related protein A1b	3.42939	10.7733	0.000231541	0.00478287
Pprc1	ENSMUSG00000055491	peroxisome proliferative activated receptor, gamma, coactivator-related 1	3.42904	10.7707	0.000547427	0.00790257
Cab39l	ENSMUSG00000021981	calcium binding protein 39-like	3.41925	10.6978	0.00537134	0.0295073
Rpl41	ENSMUSG00000093674	ribosomal protein L41	3.41572	10.6717	0.00374482	0.0244948
Tusc3	ENSMUSG00000039530	tumor suppressor candidate 3	3.41494	10.666	0.000438907	0.0070119
Plcb3	ENSMUSG00000024960	phospholipase C, beta 3	3.41475	10.6646	0.00254104	0.0200154
Cat	ENSMUSG00000027187	catalase	3.41124	10.6386	0.00252886	0.0200154
Ttc3	ENSMUSG00000040785	tetratricopeptide repeat domain 3	3.40934	10.6246	0.00656965	0.0330707
Slc39a14	ENSMUSG00000022094	solute carrier family 39 (zinc transporter), member 14	3.40887	10.6212	0.000538362	0.00783363
Cuta	ENSMUSG00000024194	cutA divalent cation tolerance homolog	3.40796	10.6144	8.82807e-05	0.00296131
Lacc1	ENSMUSG00000044350	laccase domain containing 1	3.40704	10.6077	0.000208034	0.00457321
Rps24	ENSMUSG00000025290	ribosomal protein S24	3.40699	10.6074	0.00518266	0.0289961
Rabggtb	ENSMUSG00000038975	Rab geranylgeranyl transferase, b subunit	3.40066	10.5609	9.67702e-05	0.00312176
Emc6	ENSMUSG00000047260	ER membrane protein complex subunit 6	3.40058	10.5603	5.22797e-05	0.002216
Tmsb10	ENSMUSG00000079523	thymosin, beta 10	3.39929	10.5509	0.00265284	0.0204382
Pls1	ENSMUSG00000049493	plastin 1 (I-isoform)	3.39894	10.5483	0.000910727	0.0108557
Dnase2a	ENSMUSG00000003812	deoxyribonuclease II alpha	3.39694	10.5337	0.000696144	0.00942405
Foxp4	ENSMUSG00000023991	forkhead box P4	3.3965	10.5305	5.82834e-05	0.00232551
Hibadh	ENSMUSG00000029776	3-hydroxyisobutyrate dehydrogenase	3.39473	10.5175	0.000789459	0.0101071
Npm1	ENSMUSG00000057113	nucleophosmin 1	3.39415	10.5133	0.000300968	0.0055112
Naa25	ENSMUSG00000042719	N(alpha)-acetyltransferase 25, NatB auxiliary subunit	3.39211	10.4985	0.00038939	0.00651648
Maged1	ENSMUSG00000025151	melanoma antigen, family D, 1	3.38683	10.4602	0.00186611	0.0168954
Abcf1	ENSMUSG00000038762	ATP-binding cassette, sub-family F (GCN20), member 1	3.38217	10.4264	0.0108786	0.0446502
F2rl1	ENSMUSG00000021678	coagulation factor II (thrombin) receptor-like 1	3.37706	10.3896	0.000689289	0.00938151
Camk2n1	ENSMUSG00000046447	calcium/calmodulin-dependent protein kinase II inhibitor 1	3.37281	10.359	0.000212946	0.00457321
Nr3c2	ENSMUSG00000031618	nuclear receptor subfamily 3, group C, member 2	3.37205	10.3535	0.000113975	0.00332323
Dlk1	ENSMUSG00000040856	delta like non-canonical Notch ligand 1	3.36972	10.3368	0.00205443	0.0177186
Epha4	ENSMUSG00000026235	Eph receptor A4	3.3692	10.3331	0.000826273	0.0103026
Slc12a2	ENSMUSG00000024597	solute carrier family 12, member 2	3.36878	10.3301	0.000713392	0.00957208
Pogk	ENSMUSG00000040596	pogo transposable element with KRAB domain	3.36847	10.3279	0.000209055	0.00457321
Id1	ENSMUSG00000042745	inhibitor of DNA binding 1	3.36821	10.326	0.00122034	0.0127605
Kng2	ENSMUSG00000060459	kininogen 2	3.36651	10.3138	0.000805936	0.0101329
Plch1	ENSMUSG00000036834	phospholipase C, eta 1	3.36542	10.3061	0.0011488	0.0123358
Atp5j	ENSMUSG00000022890	ATP synthase, H+ transporting, mitochondrial F0 complex, subunit F	3.36537	10.3057	0.0100832	0.0427758
Cystm1	ENSMUSG00000046727	cysteine-rich transmembrane module containing 1	3.36351	10.2924	0.000892159	0.0107017
Nipal1	ENSMUSG00000067219	NIPA-like domain containing 1	3.36197	10.2814	0.000220589	0.00463233
Ajuba	ENSMUSG00000022178	ajuba LIM protein	3.36031	10.2696	0.00013728	0.00363887
Rpl38	ENSMUSG00000057322	ribosomal protein L38	3.36005	10.2677	0.000675096	0.0092381
Epb41l4b	ENSMUSG00000028434	erythrocyte membrane protein band 4.1 like 4b	3.35383	10.2236	0.00109787	0.0121503
Grpel2	ENSMUSG00000024580	GrpE-like 2, mitochondrial	3.35187	10.2097	0.000283855	0.00531787
Tia1	ENSMUSG00000071337	cytotoxic granule-associated RNA binding protein 1	3.35178	10.2091	0.00175933	0.0162652
Adora1	ENSMUSG00000042429	adenosine A1 receptor	3.3499	10.1958	0.00227227	0.0188701
Ppp1r13l	ENSMUSG00000040734	protein phosphatase 1, regulatory subunit 13 like	3.34863	10.1868	0.000491851	0.00747238
Fundc1	ENSMUSG00000025040	FUN14 domain containing 1	3.34696	10.175	0.000310689	0.00566185
Nckap5	ENSMUSG00000049690	NCK-associated protein 5	3.34684	10.1741	0.00878061	0.0396934
Spaca6	ENSMUSG00000080316	sperm acrosome associated 6	3.34435	10.1566	0.00152853	0.0149135
Rps20	ENSMUSG00000028234	ribosomal protein S20	3.33914	10.12	0.0045109	0.0270432
Fam135a	ENSMUSG00000026153	family with sequence similarity 135, member A	3.33887	10.1181	0.000341107	0.00594466
Rasef	ENSMUSG00000043003	RAS and EF hand domain containing	3.33666	10.1027	0.000937378	0.0109509
Faf2	ENSMUSG00000025873	Fas associated factor family member 2	3.33637	10.1006	0.0032329	0.0226094
Amot	ENSMUSG00000041688	angiomotin	3.3352	10.0924	0.00673006	0.0335883
Gpr84	ENSMUSG00000063234	G protein-coupled receptor 84	3.33515	10.0921	0.000126723	0.00347189
Rmdn2	ENSMUSG00000036368	regulator of microtubule dynamics 2	3.33441	10.0869	0.00245431	0.0197308
Cdk18	ENSMUSG00000026437	cyclin-dependent kinase 18	3.33391	10.0834	0.000173372	0.00419799
Cxcl16	ENSMUSG00000018920	chemokine (C-X-C motif) ligand 16	3.33279	10.0755	0.0038049	0.024696
Aamp	ENSMUSG00000006299	angio-associated migratory protein	3.33268	10.0748	0.0108163	0.0445339
Pfdn2	ENSMUSG00000006412	prefoldin 2	3.33186	10.0691	0.00093994	0.0109509
Pafah2	ENSMUSG00000037366	platelet-activating factor acetylhydrolase 2	3.32641	10.0311	0.000298519	0.00547959
Itih2	ENSMUSG00000037254	inter-alpha trypsin inhibitor, heavy chain 2	3.32627	10.0302	0.000315416	0.0057093
Suclg2	ENSMUSG00000061838	succinate-Coenzyme A ligase, GDP-forming, beta subunit	3.32572	10.0263	0.000121719	0.0034303
Akr1b8	ENSMUSG00000029762	aldo-keto reductase family 1, member B8	3.32258	10.0045	0.00196243	0.0173653
Clcn3	ENSMUSG00000004319	chloride channel, voltage-sensitive 3	3.32125	9.99531	0.00532185	0.0294059
AU020206	ENSMUSG00000097415	expressed sequence AU020206	3.32032	9.98883	0.000457118	0.00715105
Mtap	ENSMUSG00000062937	methylthioadenosine phosphorylase	3.31891	9.97912	0.000268289	0.00523666
Tmem273	ENSMUSG00000041707	transmembrane protein 273	3.31853	9.97648	0.000398521	0.00662244
Nucks1	ENSMUSG00000026434	nuclear casein kinase and cyclin-dependent kinase substrate 1	3.31761	9.97014	0.00286585	0.0213
Adcy6	ENSMUSG00000022994	adenylate cyclase 6	3.31536	9.95455	0.00351368	0.0236206
C3ar1	ENSMUSG00000040552	complement component 3a receptor 1	3.31475	9.95034	0.000505818	0.0075947
Pex26	ENSMUSG00000067825	peroxisomal biogenesis factor 26	3.31378	9.94366	0.00209946	0.0179842
Entpd5	ENSMUSG00000021236	ectonucleoside triphosphate diphosphohydrolase 5	3.31111	9.92532	0.000881969	0.010613
Ocln	ENSMUSG00000021638	occludin	3.30876	9.90911	0.00122727	0.0127801
Cdkn2a	ENSMUSG00000044303	cyclin dependent kinase inhibitor 2A	3.30619	9.89152	0.00415079	0.0257002
Eif2b5	ENSMUSG00000003235	eukaryotic translation initiation factor 2B, subunit 5 epsilon	3.30366	9.87419	0.0007906	0.0101071
Gclc	ENSMUSG00000032350	glutamate-cysteine ligase, catalytic subunit	3.30149	9.85936	0.0104762	0.0436374
Errfi1	ENSMUSG00000028967	ERBB receptor feedback inhibitor 1	3.29991	9.84855	0.00740696	0.0357379
Fat1	ENSMUSG00000070047	FAT atypical cadherin 1	3.29937	9.84488	0.000477297	0.00732467
Ankrd50	ENSMUSG00000044864	ankyrin repeat domain 50	3.29723	9.83025	0.00353272	0.0236206
Psmd5	ENSMUSG00000026869	proteasome (prosome, macropain) 26S subunit, non-ATPase, 5	3.2933	9.80353	0.000580907	0.00823151
Mak16	ENSMUSG00000031578	MAK16 homolog	3.29191	9.79406	0.000433648	0.00699464
Cx3cr1	ENSMUSG00000052336	chemokine (C-X3-C motif) receptor 1	3.29177	9.79312	0.00122277	0.0127683
Hcfc1	ENSMUSG00000031386	host cell factor C1	3.29103	9.78812	0.00398991	0.0252312
Mboat1	ENSMUSG00000038732	membrane bound O-acyltransferase domain containing 1	3.28185	9.72605	0.00114237	0.0123358
Tbl3	ENSMUSG00000040688	transducin (beta)-like 3	3.28183	9.72589	8.36432e-05	0.0028563
Mast2	ENSMUSG00000003810	microtubule associated serine/threonine kinase 2	3.2781	9.70078	0.00249373	0.0199003
Ndufb10	ENSMUSG00000040048	NADH:ubiquinone oxidoreductase subunit B10	3.27804	9.70037	0.00139352	0.013937
Spire2	ENSMUSG00000010154	spire type actin nucleation factor 2	3.27803	9.70028	0.000421114	0.00683721
S100pbp	ENSMUSG00000040928	S100P binding protein	3.27789	9.69937	0.00109727	0.0121503
Nr6a1	ENSMUSG00000063972	nuclear receptor subfamily 6, group A, member 1	3.27784	9.69902	0.00115956	0.0123637
Parm1	ENSMUSG00000034981	prostate androgen-regulated mucin-like protein 1	3.27727	9.69519	0.00301415	0.0217829
Aif1l	ENSMUSG00000001864	allograft inflammatory factor 1-like	3.27708	9.69391	0.00399893	0.0252312
Pa2g4	ENSMUSG00000025364	proliferation-associated 2G4	3.27625	9.68837	0.00126675	0.0130301
Atmin	ENSMUSG00000047388	ATM interactor	3.27366	9.67094	0.000259829	0.00518358
Dmkn	ENSMUSG00000060962	dermokine	3.27365	9.67092	0.00170016	0.0159973
Exph5	ENSMUSG00000034584	exophilin 5	3.27299	9.66645	0.00124814	0.0129265
Tubb5	ENSMUSG00000001525	tubulin, beta 5 class I	3.2728	9.66518	0.0110167	0.044982
Syncrip	ENSMUSG00000032423	synaptotagmin binding, cytoplasmic RNA interacting protein	3.27068	9.65102	0.00786988	0.0370569
Cbarp	ENSMUSG00000035640	calcium channel, voltage-dependent, beta subunit associated regulatory protein	3.26865	9.63741	7.62892e-06	0.000863239
Ank1	ENSMUSG00000031543	ankyrin 1, erythroid	3.26703	9.62663	0.00743659	0.0357674
Iars2	ENSMUSG00000026618	isoleucine-tRNA synthetase 2, mitochondrial	3.26611	9.62047	0.00196536	0.0173653
Hist1h4d	ENSMUSG00000061482	histone cluster 1, H4d	3.26386	9.60552	0.000787399	0.0101003
Hsd17b4	ENSMUSG00000024507	hydroxysteroid (17-beta) dehydrogenase 4	3.26304	9.60001	0.00583379	0.0310794
Ppa2	ENSMUSG00000028013	pyrophosphatase (inorganic) 2	3.25966	9.57755	0.000770938	0.00999057
Taf2	ENSMUSG00000037343	TATA-box binding protein associated factor 2	3.25882	9.57202	0.00205174	0.0177156
Fbxl19	ENSMUSG00000030811	F-box and leucine-rich repeat protein 19	3.25373	9.5383	0.000275043	0.00528733
Plat	ENSMUSG00000031538	plasminogen activator, tissue	3.25161	9.52428	0.000835024	0.0103606
Kctd3	ENSMUSG00000026608	potassium channel tetramerisation domain containing 3	3.24971	9.51174	0.000605642	0.00846102
Arhgap22	ENSMUSG00000063506	Rho GTPase activating protein 22	3.24853	9.50399	0.00113681	0.0123358
Rpl35	ENSMUSG00000062997	ribosomal protein L35	3.24776	9.49889	0.0021878	0.0184286
Ywhaq	ENSMUSG00000076432	tyrosine 3-monooxygenase/tryptophan 5-monooxygenase activation protein theta	3.24144	9.45736	0.00181577	0.016645
Susd2	ENSMUSG00000006342	sushi domain containing 2	3.23973	9.44616	0.00238173	0.019386
Tef	ENSMUSG00000022389	thyrotroph embryonic factor	3.23963	9.4455	0.000904674	0.0108347
Itgb4	ENSMUSG00000020758	integrin beta 4	3.23592	9.42126	0.00447592	0.0269927
Hspd1	ENSMUSG00000025980	heat shock protein 1 (chaperonin)	3.23552	9.41868	0.00143303	0.014184
Ptprz1	ENSMUSG00000068748	protein tyrosine phosphatase, receptor type Z, polypeptide 1	3.23479	9.41386	0.00387487	0.0248834
Pfkl	ENSMUSG00000020277	phosphofructokinase, liver, B-type	3.23041	9.38536	0.00411021	0.0255615
Enah	ENSMUSG00000022995	ENAH actin regulator	3.22759	9.36699	0.00202699	0.0176425
Entpd3	ENSMUSG00000041608	ectonucleoside triphosphate diphosphohydrolase 3	3.22615	9.35766	0.00189578	0.0170082
Dock1	ENSMUSG00000058325	dedicator of cytokinesis 1	3.22614	9.35761	0.00942336	0.0414506
Zfp827	ENSMUSG00000071064	zinc finger protein 827	3.22296	9.33699	5.21596e-08	7.90845e-05
Reep6	ENSMUSG00000035504	receptor accessory protein 6	3.21992	9.31737	0.00101969	0.0116595
Psmd1	ENSMUSG00000026229	proteasome (prosome, macropain) 26S subunit, non-ATPase, 1	3.21716	9.29952	0.00462621	0.0274208
Psd3	ENSMUSG00000030465	pleckstrin and Sec7 domain containing 3	3.21046	9.25649	0.00597779	0.0315363
Dbn1	ENSMUSG00000034675	drebrin 1	3.20876	9.24558	0.0028906	0.0214378
Rpl36a	ENSMUSG00000079435	ribosomal protein L36A	3.2082	9.24195	0.00264019	0.0204285
Me1	ENSMUSG00000032418	malic enzyme 1, NADP(+)-dependent, cytosolic	3.20632	9.22995	0.00828145	0.038341
Eef1g	ENSMUSG00000071644	eukaryotic translation elongation factor 1 gamma	3.20382	9.21394	0.00540782	0.0296527
Mrps25	ENSMUSG00000014551	mitochondrial ribosomal protein S25	3.20348	9.21179	0.00169685	0.0159973
Parn	ENSMUSG00000022685	poly(A)-specific ribonuclease (deadenylation nuclease)	3.2032	9.20996	0.000930824	0.0109509
Prrc1	ENSMUSG00000024594	proline-rich coiled-coil 1	3.20286	9.20783	0.00126992	0.013045
Zmym3	ENSMUSG00000031310	zinc finger, MYM-type 3	3.20212	9.20311	0.00314901	0.0222349
Acads	ENSMUSG00000029545	acyl-Coenzyme A dehydrogenase, short chain	3.19953	9.18659	0.000475917	0.00732467
Cep170b	ENSMUSG00000072825	centrosomal protein 170B	3.19911	9.18391	0.00164302	0.0156676
Srek1	ENSMUSG00000032621	splicing regulatory glutamine/lysine-rich protein 1	3.19864	9.18095	0.00663122	0.0332702
Mtch2	ENSMUSG00000027282	mitochondrial carrier 2	3.19431	9.15341	0.00156693	0.015185
Ssr2	ENSMUSG00000041355	signal sequence receptor, beta	3.19408	9.15193	0.000453282	0.00712679
Tlcd1	ENSMUSG00000019437	TLC domain containing 1	3.19403	9.15162	0.00123777	0.0128542
Usp33	ENSMUSG00000025437	ubiquitin specific peptidase 33	3.19071	9.13058	0.00969174	0.0418729
Cbx1	ENSMUSG00000018666	chromobox 1	3.19022	9.12751	0.00215002	0.0182115
Mapkbp1	ENSMUSG00000033902	mitogen-activated protein kinase binding protein 1	3.19017	9.12717	0.00167362	0.0158631
2008-03-01	ENSMUSG00000025702	membrane-associated ring finger (C3HC4) 8	3.18703	9.10731	0.00242349	0.0195869
Ngef	ENSMUSG00000026259	neuronal guanine nucleotide exchange factor	3.18692	9.10663	0.000278978	0.00528733
Arfgef2	ENSMUSG00000074582	ADP-ribosylation factor guanine nucleotide-exchange factor 2 (brefeldin A-inhibited)	3.18385	9.08729	0.00946344	0.0414506
Clcf1	ENSMUSG00000040663	cardiotrophin-like cytokine factor 1	3.18303	9.08214	0.00015514	0.00398099
Prrg3	ENSMUSG00000033361	proline rich Gla (G-carboxyglutamic acid) 3 (transmembrane)	3.1806	9.06685	0.0042115	0.0259362
Hint1	ENSMUSG00000020267	histidine triad nucleotide binding protein 1	3.17987	9.06227	0.000432934	0.00699464
Dpep2	ENSMUSG00000053687	dipeptidase 2	3.17958	9.06043	0.00117205	0.0124619
Bag1	ENSMUSG00000028416	BCL2-associated athanogene 1	3.17897	9.05658	0.00889152	0.0400277
Camsap1	ENSMUSG00000026933	calmodulin regulated spectrin-associated protein 1	3.17749	9.04734	0.00224692	0.0187913
Snrpd3	ENSMUSG00000020180	small nuclear ribonucleoprotein D3	3.17523	9.03317	0.00238221	0.019386
Smarcb1	ENSMUSG00000000902	SWI/SNF related, matrix associated, actin dependent regulator of chromatin, subfamily b, member 1	3.16997	9.00031	0.00137802	0.0138003
Ints4	ENSMUSG00000025133	integrator complex subunit 4	3.16986	8.99958	0.000815554	0.0102025
Selenos	ENSMUSG00000075701	selenoprotein S	3.16743	8.98448	0.00222004	0.018638
Tardbp	ENSMUSG00000041459	TAR DNA binding protein	3.16614	8.97641	0.00651292	0.0329163
Rad54l2	ENSMUSG00000040661	RAD54 like 2 (S. cerevisiae)	3.16461	8.96688	0.00186862	0.0168954
Cyp2s1	ENSMUSG00000040703	cytochrome P450, family 2, subfamily s, polypeptide 1	3.16224	8.9522	0.000570649	0.00813175
Apmap	ENSMUSG00000033096	adipocyte plasma membrane associated protein	3.16152	8.9477	0.000387651	0.00651637
Llgl2	ENSMUSG00000020782	LLGL2 scribble cell polarity complex component	3.1613	8.94635	0.00264962	0.0204382
Smurf1	ENSMUSG00000038780	SMAD specific E3 ubiquitin protein ligase 1	3.16017	8.93936	0.0079781	0.0374571
Cul5	ENSMUSG00000032030	cullin 5	3.15703	8.9199	0.00127544	0.0130806
Kbtbd11	ENSMUSG00000055675	kelch repeat and BTB (POZ) domain containing 11	3.15446	8.90406	0.00132199	0.0134343
Eif3i	ENSMUSG00000028798	eukaryotic translation initiation factor 3, subunit I	3.15408	8.90168	0.00114576	0.0123358
Slc4a7	ENSMUSG00000021733	solute carrier family 4, sodium bicarbonate cotransporter, member 7	3.15241	8.89137	0.00324988	0.0226446
Maml2	ENSMUSG00000031925	mastermind like transcriptional coactivator 2	3.15154	8.88601	0.000248495	0.00505052
Nufip1	ENSMUSG00000022009	nuclear fragile X mental retardation protein interacting protein 1	3.15091	8.88215	0.00192694	0.0171457
Sec61a1	ENSMUSG00000030082	Sec61 alpha 1 subunit (S. cerevisiae)	3.15086	8.88187	0.00935423	0.0413096
Prdm16	ENSMUSG00000039410	PR domain containing 16	3.15074	8.88114	0.00344552	0.0233636
Zkscan1	ENSMUSG00000029729	zinc finger with KRAB and SCAN domains 1	3.15058	8.88011	0.00428485	0.0262811
Jag1	ENSMUSG00000027276	jagged 1	3.14821	8.86554	0.00955986	0.0415986
Cct5	ENSMUSG00000022234	chaperonin containing Tcp1, subunit 5 (epsilon)	3.14765	8.86214	0.00982271	0.0420646
Acsl3	ENSMUSG00000032883	acyl-CoA synthetase long-chain family member 3	3.14443	8.84233	0.00151185	0.014814
Rai14	ENSMUSG00000022246	retinoic acid induced 14	3.14358	8.83716	4.67519e-05	0.00210968
Sowahb	ENSMUSG00000045314	sosondowah ankyrin repeat domain family member B	3.14236	8.82969	0.000753767	0.00993792
Il23a	ENSMUSG00000025383	interleukin 23, alpha subunit p19	3.14225	8.82901	0.0101821	0.0429792
Srpk1	ENSMUSG00000004865	serine/arginine-rich protein specific kinase 1	3.14209	8.82804	0.00384879	0.0248672
Ecm1	ENSMUSG00000028108	extracellular matrix protein 1	3.13956	8.81256	0.00592862	0.0313861
Gtf2ird1	ENSMUSG00000023079	general transcription factor II I repeat domain-containing 1	3.13781	8.80189	0.00114196	0.0123358
Il18r1	ENSMUSG00000026070	interleukin 18 receptor 1	3.13727	8.79858	0.00828927	0.038341
Rbpjl	ENSMUSG00000017007	recombination signal binding protein for immunoglobulin kappa J region-like	3.13712	8.79767	0.00843816	0.0386991
Slc12a7	ENSMUSG00000017756	solute carrier family 12, member 7	3.13656	8.79426	0.00658536	0.0331059
Sgpp2	ENSMUSG00000032908	sphingosine-1-phosphate phosphotase 2	3.13644	8.79353	0.00121804	0.0127561
Zdhhc21	ENSMUSG00000028403	zinc finger, DHHC domain containing 21	3.13149	8.76338	0.0024387	0.0196508
Stub1	ENSMUSG00000039615	STIP1 homology and U-Box containing protein 1	3.13079	8.75912	0.00344048	0.0233503
Tcaf1	ENSMUSG00000036667	TRPM8 channel-associated factor 1	3.12739	8.73854	0.00497394	0.0283515
Stip1	ENSMUSG00000024966	stress-induced phosphoprotein 1	3.12389	8.71735	0.00299829	0.0217513
Gpat4	ENSMUSG00000031545	glycerol-3-phosphate acyltransferase 4	3.12368	8.71608	0.00375307	0.0245276
Abcc1	ENSMUSG00000023088	ATP-binding cassette, sub-family C (CFTR/MRP), member 1	3.12279	8.71069	0.0113163	0.0456281
Pld1	ENSMUSG00000027695	phospholipase D1	3.1199	8.69326	0.00322612	0.0226094
Spint1	ENSMUSG00000027315	serine protease inhibitor, Kunitz type 1	3.11978	8.69256	0.00387721	0.0248834
Slc5a3	ENSMUSG00000089774	solute carrier family 5 (inositol transporters), member 3	3.11827	8.68344	0.00565166	0.0304086
Prc1	ENSMUSG00000038943	protein regulator of cytokinesis 1	3.11765	8.67972	0.00169066	0.0159812
Cct8	ENSMUSG00000025613	chaperonin containing Tcp1, subunit 8 (theta)	3.11511	8.66445	0.00367665	0.0242582
Tsr1	ENSMUSG00000038335	TSR1 20S rRNA accumulation	3.11257	8.64924	0.00132688	0.0134573
Hes1	ENSMUSG00000022528	hes family bHLH transcription factor 1	3.11062	8.63752	0.00101076	0.0115924
Wdr35	ENSMUSG00000066643	WD repeat domain 35	3.11	8.63381	0.00256989	0.020085
Mlkl	ENSMUSG00000012519	mixed lineage kinase domain-like	3.10751	8.61891	0.000386141	0.00651637
Ptcd3	ENSMUSG00000063884	pentatricopeptide repeat domain 3	3.10613	8.61067	0.00074055	0.00984932
Cdc42bpb	ENSMUSG00000021279	CDC42 binding protein kinase beta	3.10492	8.60347	0.00451035	0.0270432
Rab11fip3	ENSMUSG00000037098	RAB11 family interacting protein 3 (class II)	3.1019	8.5855	0.00527969	0.0293441
Sil1	ENSMUSG00000024357	endoplasmic reticulum chaperone SIL1 homolog (S. cerevisiae)	3.10089	8.57948	0.000335504	0.00590129
Vil1	ENSMUSG00000026175	villin 1	3.10067	8.57815	0.000877182	0.0106059
Krt19	ENSMUSG00000020911	keratin 19	3.09992	8.57371	0.00619556	0.0321262
Net1	ENSMUSG00000021215	neuroepithelial cell transforming gene 1	3.09739	8.5587	0.00968019	0.0418628
Slc4a2	ENSMUSG00000028962	solute carrier family 4 (anion exchanger), member 2	3.09706	8.55675	0.00692132	0.0340939
Rmdn3	ENSMUSG00000070730	regulator of microtubule dynamics 3	3.0951	8.54512	0.000541432	0.00784818
Idh3b	ENSMUSG00000027406	isocitrate dehydrogenase 3 (NAD+) beta	3.09439	8.54091	0.00363936	0.024054
Topbp1	ENSMUSG00000032555	topoisomerase (DNA) II binding protein 1	3.09238	8.52901	0.00252527	0.0200154
Tes	ENSMUSG00000029552	testis derived transcript	3.09117	8.52186	0.0127292	0.0489205
Lamc1	ENSMUSG00000026478	laminin, gamma 1	3.0865	8.49431	0.0127641	0.0489205
F10	ENSMUSG00000031444	coagulation factor X	3.08409	8.48016	0.0103951	0.0434433
Mlf2	ENSMUSG00000030120	myeloid leukemia factor 2	3.08404	8.47988	0.00740203	0.0357379
Wdr36	ENSMUSG00000038299	WD repeat domain 36	3.08364	8.47754	0.00103451	0.0117662
Plch2	ENSMUSG00000029055	phospholipase C, eta 2	3.08299	8.47367	0.00613024	0.0319294
Wdr75	ENSMUSG00000025995	WD repeat domain 75	3.07927	8.45185	0.000859299	0.0104973
Vill	ENSMUSG00000038775	villin-like	3.07886	8.44945	0.00414631	0.0257002
Eif3d	ENSMUSG00000016554	eukaryotic translation initiation factor 3, subunit D	3.07874	8.44875	0.00640255	0.0326557
Prkacb	ENSMUSG00000005034	protein kinase, cAMP dependent, catalytic, beta	3.07838	8.44665	0.00254129	0.0200154
Thsd4	ENSMUSG00000032289	thrombospondin, type I, domain containing 4	3.07622	8.43401	0.000221198	0.00463233
Zfp598	ENSMUSG00000041130	zinc finger protein 598	3.07614	8.43353	0.00426873	0.0262459
Immt	ENSMUSG00000052337	inner membrane protein, mitochondrial	3.07583	8.43174	0.00956421	0.0415986
Pola1	ENSMUSG00000006678	polymerase (DNA directed), alpha 1	3.07458	8.42446	0.00474893	0.0276459
Stk38l	ENSMUSG00000001630	serine/threonine kinase 38 like	3.07394	8.4207	0.00241867	0.0195687
Eps8l2	ENSMUSG00000025504	EPS8-like 2	3.0729	8.41465	1.36773e-05	0.00107231
Drosha	ENSMUSG00000022191	drosha, ribonuclease type III	3.07083	8.40257	0.00605466	0.031765
Marveld3	ENSMUSG00000001672	MARVEL (membrane-associating) domain containing 3	3.07056	8.40098	0.000582615	0.0082403
Hnrnpa1	ENSMUSG00000046434	heterogeneous nuclear ribonucleoprotein A1	3.0694	8.39422	0.010311	0.0433542
Pcyox1	ENSMUSG00000029998	prenylcysteine oxidase 1	3.06929	8.39361	0.00497885	0.0283581
Klhl6	ENSMUSG00000043008	kelch-like 6	3.06739	8.38257	0.00481133	0.0279072
Naa16	ENSMUSG00000022020	N(alpha)-acetyltransferase 16, NatA auxiliary subunit	3.0648	8.36754	0.00103655	0.0117662
Spcs2	ENSMUSG00000035227	signal peptidase complex subunit 2 homolog (S. cerevisiae)	3.06443	8.36536	0.00157038	0.015185
Zfp7	ENSMUSG00000033669	zinc finger protein 7	3.06415	8.36375	0.0012993	0.013257
Cdh16	ENSMUSG00000031881	cadherin 16	3.06251	8.35423	0.00256928	0.020085
Mdfic	ENSMUSG00000041390	MyoD family inhibitor domain containing	3.06196	8.35108	0.0105289	0.0437366
Coq9	ENSMUSG00000031782	coenzyme Q9	3.06181	8.35019	0.000716367	0.00959501
Plcd3	ENSMUSG00000020937	phospholipase C, delta 3	3.05987	8.33899	0.00140537	0.0140186
Ptprf	ENSMUSG00000033295	protein tyrosine phosphatase, receptor type, F	3.05943	8.33644	0.000191168	0.00435208
Irf2bp2	ENSMUSG00000051495	interferon regulatory factor 2 binding protein 2	3.05718	8.32346	0.0100369	0.0426533
Kazn	ENSMUSG00000040606	kazrin, periplakin interacting protein	3.05642	8.31908	0.00349275	0.0235365
Abcb7	ENSMUSG00000031333	ATP-binding cassette, sub-family B (MDR/TAP), member 7	3.05628	8.31824	0.00110341	0.0121938
Fam208a	ENSMUSG00000040651	family with sequence similarity 208, member A	3.05537	8.313	0.0097682	0.0419909
Slc20a2	ENSMUSG00000037656	solute carrier family 20, member 2	3.05425	8.30654	1.6203e-05	0.001165
Rpl14	ENSMUSG00000025794	ribosomal protein L14	3.05406	8.30548	0.0047517	0.0276459
Ephb3	ENSMUSG00000005958	Eph receptor B3	3.04947	8.27907	0.000871977	0.0105598
Afg3l1	ENSMUSG00000031967	AFG3-like AAA ATPase 1	3.04839	8.27288	0.0021251	0.0180597
Tcf7l1	ENSMUSG00000055799	transcription factor 7 like 1 (T cell specific, HMG box)	3.0478	8.26948	0.00486366	0.0280818
Xpot	ENSMUSG00000034667	exportin, tRNA (nuclear export receptor for tRNAs)	3.04675	8.26349	0.00389761	0.0248928
Hmgxb3	ENSMUSG00000024622	HMG box domain containing 3	3.04648	8.26194	0.00296983	0.0216484
Tfrc	ENSMUSG00000022797	transferrin receptor	3.04633	8.26107	0.00807733	0.0377989
Ahr	ENSMUSG00000019256	aryl-hydrocarbon receptor	3.04596	8.25895	0.00563301	0.0304086
Cbx6	ENSMUSG00000089715	chromobox 6	3.04564	8.25713	0.00148285	0.0145804
Cadps2	ENSMUSG00000017978	Ca2+-dependent activator protein for secretion 2	3.04286	8.24122	0.00486751	0.0280827
Ccar2	ENSMUSG00000033712	cell cycle activator and apoptosis regulator 2	3.04036	8.22695	0.00348943	0.023535
Rbbp7	ENSMUSG00000031353	retinoblastoma binding protein 7, chromatin remodeling factor	3.0402	8.22607	0.0048921	0.0281602
Atl3	ENSMUSG00000024759	atlastin GTPase 3	3.03997	8.22476	0.0118012	0.0469878
Larp1	ENSMUSG00000037331	La ribonucleoprotein domain family, member 1	3.03916	8.22013	0.0120422	0.047523
Zc3h15	ENSMUSG00000027091	zinc finger CCCH-type containing 15	3.03871	8.21759	0.0100806	0.0427758
Hsd17b12	ENSMUSG00000027195	hydroxysteroid (17-beta) dehydrogenase 12	3.03675	8.20641	0.00189934	0.0170167
Fblim1	ENSMUSG00000006219	filamin binding LIM protein 1	3.03481	8.19537	0.00156764	0.015185
Pik3c2b	ENSMUSG00000026447	phosphatidylinositol-4-phosphate 3-kinase catalytic subunit type 2 beta	3.03363	8.18868	0.00524377	0.0292302
Ankrd28	ENSMUSG00000014496	ankyrin repeat domain 28	3.03271	8.18344	0.00280152	0.0210697
Rpl7l1	ENSMUSG00000063888	ribosomal protein L7-like 1	3.03164	8.17738	0.00412439	0.0256201
Smg5	ENSMUSG00000001415	Smg-5 homolog, nonsense mediated mRNA decay factor (C. elegans)	3.03128	8.17536	0.00645479	0.0327974
Acvr1	ENSMUSG00000026836	activin A receptor, type 1	3.03082	8.17276	0.00354398	0.0236616
Megf8	ENSMUSG00000045039	multiple EGF-like-domains 8	3.02651	8.14838	0.00592264	0.0313861
Rps21	ENSMUSG00000039001	ribosomal protein S21	3.02397	8.13402	0.00568707	0.030543
Zc3h14	ENSMUSG00000021012	zinc finger CCCH type containing 14	3.02341	8.13085	0.00596968	0.0315154
Syngr1	ENSMUSG00000022415	synaptogyrin 1	3.02243	8.12534	0.00151574	0.0148269
Rbfox2	ENSMUSG00000033565	RNA binding protein, fox-1 homolog (C. elegans) 2	3.02242	8.12532	0.00393783	0.0250435
Fubp3	ENSMUSG00000026843	far upstream element (FUSE) binding protein 3	3.02123	8.11862	0.00307258	0.021947
Ptgs1	ENSMUSG00000047250	prostaglandin-endoperoxide synthase 1	3.02108	8.11775	1.72164e-05	0.00119741
Dhcr24	ENSMUSG00000034926	24-dehydrocholesterol reductase	3.02	8.11168	0.000278223	0.00528733
Ssr4	ENSMUSG00000002014	signal sequence receptor, delta	3.01789	8.09982	0.00291586	0.021524
Col4a3	ENSMUSG00000079465	collagen, type IV, alpha 3	3.0166	8.0926	0.00993453	0.0423586
Efl1	ENSMUSG00000038563	elongation factor like GPTase 1	3.01409	8.0785	0.00307324	0.021947
Samm50	ENSMUSG00000022437	SAMM50 sorting and assembly machinery component	3.01214	8.06762	0.00161198	0.0154298
Ttc14	ENSMUSG00000027677	tetratricopeptide repeat domain 14	3.01138	8.06336	0.00759856	0.0362294
Plin3	ENSMUSG00000024197	perilipin 3	3.01001	8.05571	0.0014308	0.014184
Snrpf	ENSMUSG00000020018	small nuclear ribonucleoprotein polypeptide F	3.00973	8.05415	0.00319951	0.0225405
Mob1b	ENSMUSG00000006262	MOB kinase activator 1B	3.00781	8.04342	0.00692126	0.0340939
Polr3e	ENSMUSG00000030880	polymerase (RNA) III (DNA directed) polypeptide E	3.00559	8.03105	0.00187207	0.0168954
Traf4	ENSMUSG00000017386	TNF receptor associated factor 4	3.00543	8.03019	0.00229592	0.0189807
Mphosph8	ENSMUSG00000079184	M-phase phosphoprotein 8	3.00416	8.02311	0.00192241	0.0171255
Depp1	ENSMUSG00000048489	DEPP1 autophagy regulator	3.00348	8.01932	0.00230932	0.019008
Dnpep	ENSMUSG00000026209	aspartyl aminopeptidase	3.0027	8.01497	0.000338074	0.00590539
Adcy7	ENSMUSG00000031659	adenylate cyclase 7	3.00234	8.013	0.0067894	0.033729
Car8	ENSMUSG00000041261	carbonic anhydrase 8	3.00206	8.01142	0.000457494	0.00715105
Haus6	ENSMUSG00000038047	HAUS augmin-like complex, subunit 6	3.002	8.01107	0.000799947	0.0101329
Spcs3	ENSMUSG00000054408	signal peptidase complex subunit 3 homolog (S. cerevisiae)	2.99912	7.99514	0.00193119	0.0171531
Etfb	ENSMUSG00000004610	electron transferring flavoprotein, beta polypeptide	2.99667	7.98153	0.00266067	0.020457
Gne	ENSMUSG00000028479	glucosamine (UDP-N-acetyl)-2-epimerase/N-acetylmannosamine kinase	2.99663	7.98136	0.00184819	0.0168403
Opa1	ENSMUSG00000038084	OPA1, mitochondrial dynamin like GTPase	2.99584	7.97695	0.00686195	0.0339165
Washc5	ENSMUSG00000022350	WASH complex subunit 5	2.99273	7.95978	0.00606582	0.0317795
Tsc2	ENSMUSG00000002496	tuberous sclerosis 2	2.99132	7.95199	0.00856655	0.0390048
Selenof	ENSMUSG00000037072	selenoprotein F	2.99102	7.95037	0.008755	0.039628
Rps28	ENSMUSG00000067288	ribosomal protein S28	2.99102	7.95036	0.000100017	0.00316926
Atad3a	ENSMUSG00000029036	ATPase family, AAA domain containing 3A	2.98967	7.9429	0.00225045	0.0187913
Elmo3	ENSMUSG00000014791	engulfment and cell motility 3	2.98902	7.93935	0.00084706	0.0104403
Pmpca	ENSMUSG00000026926	peptidase (mitochondrial processing) alpha	2.98434	7.91365	0.00370717	0.0243536
Hook1	ENSMUSG00000028572	hook microtubule tethering protein 1	2.98414	7.91252	0.00253504	0.0200154
Cxcl1	ENSMUSG00000029380	chemokine (C-X-C motif) ligand 1	2.98334	7.90817	0.000451724	0.00712679
Adgrg1	ENSMUSG00000031785	adhesion G protein-coupled receptor G1	2.98281	7.90525	0.000308132	0.00562879
Dtx4	ENSMUSG00000039982	deltex 4, E3 ubiquitin ligase	2.98159	7.89855	0.00977866	0.0419909
Wnk4	ENSMUSG00000035112	WNK lysine deficient protein kinase 4	2.97972	7.88833	0.00289288	0.0214378
Atp13a1	ENSMUSG00000031862	ATPase type 13A1	2.9786	7.88219	0.00371568	0.0243673
Rpl27a	ENSMUSG00000046364	ribosomal protein L27A	2.97844	7.88136	0.0118768	0.0471155
Tmtc3	ENSMUSG00000036676	transmembrane and tetratricopeptide repeat containing 3	2.97805	7.87918	0.000400089	0.00662244
Fam126b	ENSMUSG00000038174	family with sequence similarity 126, member B	2.97792	7.87848	0.00300445	0.0217694
Gnl3	ENSMUSG00000042354	guanine nucleotide binding protein-like 3 (nucleolar)	2.97637	7.87002	0.000766238	0.00996372
Idh2	ENSMUSG00000030541	isocitrate dehydrogenase 2 (NADP+), mitochondrial	2.97561	7.8659	0.00637769	0.0326325
Naa15	ENSMUSG00000063273	N(alpha)-acetyltransferase 15, NatA auxiliary subunit	2.97283	7.85075	0.00512469	0.0288018
Mtmr2	ENSMUSG00000031918	myotubularin related protein 2	2.97088	7.84015	0.00191305	0.0170822
Rhoq	ENSMUSG00000024143	ras homolog family member Q	2.97055	7.83835	0.00400751	0.0252333
Snrnp48	ENSMUSG00000021431	small nuclear ribonucleoprotein 48 (U11/U12)	2.97002	7.83548	0.00329565	0.0228585
Hic1	ENSMUSG00000043099	hypermethylated in cancer 1	2.96921	7.83107	0.00409366	0.0255214
Fem1b	ENSMUSG00000032244	feminization 1 homolog b (C. elegans)	2.9692	7.831	0.00497218	0.0283515
Tmem135	ENSMUSG00000039428	transmembrane protein 135	2.96847	7.82704	0.00319596	0.0225382
Abce1	ENSMUSG00000058355	ATP-binding cassette, sub-family E (OABP), member 1	2.96721	7.82025	0.00973301	0.0419229
Mreg	ENSMUSG00000039395	melanoregulin	2.96549	7.81091	0.00297662	0.0216562
Ttll12	ENSMUSG00000016757	tubulin tyrosine ligase-like family, member 12	2.964	7.80283	0.00174853	0.0162211
Rnf150	ENSMUSG00000047747	ring finger protein 150	2.95952	7.77867	0.00667001	0.0333985
Ddx10	ENSMUSG00000053289	DEAD (Asp-Glu-Ala-Asp) box polypeptide 10	2.95658	7.7628	0.00526565	0.029309
Ripk4	ENSMUSG00000005251	receptor-interacting serine-threonine kinase 4	2.9562	7.76079	5.56161e-06	0.000745486
Stk25	ENSMUSG00000026277	serine/threonine kinase 25 (yeast)	2.9554	7.75647	0.00810977	0.0378805
Fkbp1a	ENSMUSG00000032966	FK506 binding protein 1a	2.95501	7.75437	0.0118995	0.0471812
Rrm1	ENSMUSG00000030978	ribonucleotide reductase M1	2.95342	7.74586	0.00155088	0.0150927
Slc30a4	ENSMUSG00000005802	solute carrier family 30 (zinc transporter), member 4	2.95267	7.74182	0.00100812	0.0115796
Cops2	ENSMUSG00000027206	COP9 signalosome subunit 2	2.9519	7.73765	0.00448276	0.0269927
Cdh1	ENSMUSG00000000303	cadherin 1	2.95133	7.73462	0.00382371	0.0247854
Naa40	ENSMUSG00000024764	N(alpha)-acetyltransferase 40, NatD catalytic subunit	2.95087	7.73214	0.00261265	0.0203561
Ppib	ENSMUSG00000032383	peptidylprolyl isomerase B	2.95063	7.73084	0.00969909	0.0418729
Psma7	ENSMUSG00000027566	proteasome (prosome, macropain) subunit, alpha type 7	2.95059	7.73068	0.00459462	0.0272976
Actl6a	ENSMUSG00000027671	actin-like 6A	2.94955	7.7251	0.00092693	0.0109509
Megf6	ENSMUSG00000057751	multiple EGF-like-domains 6	2.94776	7.7155	0.00954411	0.0415986
Trap1	ENSMUSG00000005981	TNF receptor-associated protein 1	2.9453	7.70235	0.00347316	0.023467
Manf	ENSMUSG00000032575	mesencephalic astrocyte-derived neurotrophic factor	2.94484	7.69991	0.00261583	0.02036
Itga9	ENSMUSG00000039115	integrin alpha 9	2.94471	7.69919	0.000982804	0.011375
Samd4	ENSMUSG00000021838	sterile alpha motif domain containing 4	2.94392	7.69498	0.00434718	0.0265133
Scamp1	ENSMUSG00000021687	secretory carrier membrane protein 1	2.94265	7.68821	0.00306615	0.021947
Fut2	ENSMUSG00000055978	fucosyltransferase 2	2.94143	7.6817	2.75006e-05	0.00159146
Senp5	ENSMUSG00000022772	SUMO/sentrin specific peptidase 5	2.94107	7.67983	0.00294394	0.0215873
Itm2c	ENSMUSG00000026223	integral membrane protein 2C	2.94103	7.67961	0.00495454	0.0283047
Luzp1	ENSMUSG00000001089	leucine zipper protein 1	2.93915	7.6696	0.00621915	0.0322099
Rpl36	ENSMUSG00000057863	ribosomal protein L36	2.93874	7.66743	0.00959311	0.0416528
Def8	ENSMUSG00000001482	differentially expressed in FDCP 8	2.93775	7.66216	0.00262315	0.020396
Xrcc5	ENSMUSG00000026187	X-ray repair complementing defective repair in Chinese hamster cells 5	2.93746	7.66061	0.000415152	0.00679756
L3mbtl2	ENSMUSG00000022394	L3MBTL2 polycomb repressive complex 1 subunit	2.93316	7.63781	0.00183027	0.0167373
Rnase4	ENSMUSG00000021876	ribonuclease, RNase A family 4	2.93286	7.63621	0.00903298	0.0404483
Arg1	ENSMUSG00000019987	arginase, liver	2.93132	7.62806	0.00574212	0.0307639
Asnsd1	ENSMUSG00000026095	asparagine synthetase domain containing 1	2.93069	7.62475	0.00436404	0.0265307
Mgat2	ENSMUSG00000043998	mannoside acetylglucosaminyltransferase 2	2.92985	7.62031	0.00309688	0.0220645
Zbtb41	ENSMUSG00000033964	zinc finger and BTB domain containing 41	2.92934	7.61763	0.00492049	0.0282217
Ccdc91	ENSMUSG00000030301	coiled-coil domain containing 91	2.92933	7.61757	0.00360068	0.0238853
P4ha1	ENSMUSG00000019916	procollagen-proline, 2-oxoglutarate 4-dioxygenase (proline 4-hydroxylase), alpha 1 polypeptide	2.92698	7.60515	0.000264645	0.00523666
Nop2	ENSMUSG00000038279	NOP2 nucleolar protein	2.92457	7.5925	0.00243917	0.0196508
Arhgef10l	ENSMUSG00000040964	Rho guanine nucleotide exchange factor (GEF) 10-like	2.92334	7.58598	0.0055571	0.0302429
Fuk	ENSMUSG00000033703	fucokinase	2.92296	7.58402	0.00170269	0.0159973
Upf3b	ENSMUSG00000036572	UPF3 regulator of nonsense transcripts homolog B (yeast)	2.92195	7.5787	0.00747578	0.0358354
Serpine2	ENSMUSG00000026249	serine (or cysteine) peptidase inhibitor, clade E, member 2	2.92082	7.57276	0.00826373	0.038293
Siva1	ENSMUSG00000064326	SIVA1, apoptosis-inducing factor	2.92034	7.57025	0.00136978	0.0137359
Ldlrad3	ENSMUSG00000048058	low density lipoprotein receptor class A domain containing 3	2.92003	7.56861	0.00767522	0.0364117
Pick1	ENSMUSG00000068206	protein interacting with C kinase 1	2.91995	7.56818	0.00633208	0.0325227
Plekha5	ENSMUSG00000030231	pleckstrin homology domain containing, family A member 5	2.91994	7.56816	0.00297615	0.0216562
Smarcad1	ENSMUSG00000029920	SWI/SNF-related, matrix-associated actin-dependent regulator of chromatin, subfamily a, containing DEAD/H box 1	2.91986	7.56771	0.00452111	0.0270517
Pitpnm2	ENSMUSG00000029406	phosphatidylinositol transfer protein, membrane-associated 2	2.91833	7.55969	0.00485117	0.0280524
Lig1	ENSMUSG00000056394	ligase I, DNA, ATP-dependent	2.91775	7.55668	0.00440385	0.0267084
Il1a	ENSMUSG00000027399	interleukin 1 alpha	2.91689	7.55218	1.32462e-05	0.00105705
Tmem260	ENSMUSG00000036339	transmembrane protein 260	2.91668	7.55109	0.00428103	0.0262811
Emc1	ENSMUSG00000078517	ER membrane protein complex subunit 1	2.91602	7.54762	0.00706687	0.0346222
Tor1b	ENSMUSG00000026848	torsin family 1, member B	2.91579	7.54643	0.00361332	0.0239237
Cpsf4	ENSMUSG00000029625	cleavage and polyadenylation specific factor 4	2.91416	7.53788	0.00198084	0.017441
Tgm1	ENSMUSG00000022218	transglutaminase 1, K polypeptide	2.91409	7.53751	0.00471762	0.0276443
Psmc1	ENSMUSG00000021178	protease (prosome, macropain) 26S subunit, ATPase 1	2.91381	7.53606	0.0106355	0.044107
Pcca	ENSMUSG00000041650	propionyl-Coenzyme A carboxylase, alpha polypeptide	2.91298	7.53174	0.00225069	0.0187913
Phc2	ENSMUSG00000028796	polyhomeotic 2	2.91279	7.53074	0.00672074	0.0335638
Rps11	ENSMUSG00000003429	ribosomal protein S11	2.9127	7.53026	0.00969897	0.0418729
Fam13a	ENSMUSG00000037709	family with sequence similarity 13, member A	2.91221	7.52771	0.00512514	0.0288018
Efnb2	ENSMUSG00000001300	ephrin B2	2.90893	7.5106	0.0115328	0.0460887
Zfp280b	ENSMUSG00000049764	zinc finger protein 280B	2.90754	7.50337	0.00310422	0.0220645
Selenoi	ENSMUSG00000075703	selenoprotein I	2.90725	7.50185	0.00474655	0.0276459
Tspyl2	ENSMUSG00000041096	TSPY-like 2	2.9029	7.47927	0.00369127	0.0242913
Hnf4a	ENSMUSG00000017950	hepatic nuclear factor 4, alpha	2.90189	7.47406	0.00552713	0.0301014
Sema4b	ENSMUSG00000030539	sema domain, immunoglobulin domain (Ig), transmembrane domain (TM) and short cytoplasmic domain, (semaphorin) 4B	2.89946	7.46148	0.00688856	0.0339988
Pabpc4	ENSMUSG00000011257	poly(A) binding protein, cytoplasmic 4	2.89887	7.45841	0.00494123	0.0282713
Tnpo2	ENSMUSG00000031691	transportin 2 (importin 3, karyopherin beta 2b)	2.89833	7.45562	0.00405602	0.0254054
Mtif2	ENSMUSG00000020459	mitochondrial translational initiation factor 2	2.89638	7.44557	0.00107203	0.0120064
Cluh	ENSMUSG00000020741	clustered mitochondria (cluA/CLU1) homolog	2.8961	7.44412	0.00823029	0.0382499
Sdad1	ENSMUSG00000029415	SDA1 domain containing 1	2.89311	7.42868	0.00248535	0.0198959
Ivd	ENSMUSG00000027332	isovaleryl coenzyme A dehydrogenase	2.89293	7.4278	0.00743333	0.0357674
Srp72	ENSMUSG00000036323	signal recognition particle 72	2.89111	7.41841	0.0126502	0.0488778
Jak3	ENSMUSG00000031805	Janus kinase 3	2.88984	7.4119	0.00521935	0.0291253
Ufd1	ENSMUSG00000005262	ubiquitin recognition factor in ER-associated degradation 1	2.88951	7.41021	0.00730083	0.0354197
Lamb2	ENSMUSG00000052911	laminin, beta 2	2.88896	7.40737	0.0130994	0.0497529
Polk	ENSMUSG00000021668	polymerase (DNA directed), kappa	2.88664	7.39547	0.00335836	0.0230676
Seh1l	ENSMUSG00000079614	SEH1-like (S. cerevisiae	2.88651	7.39482	0.00324587	0.0226446
Ttc13	ENSMUSG00000037300	tetratricopeptide repeat domain 13	2.88467	7.38539	0.000932081	0.0109509
Gnptab	ENSMUSG00000035311	N-acetylglucosamine-1-phosphate transferase, alpha and beta subunits	2.88423	7.38314	0.0114647	0.0459374
Atad1	ENSMUSG00000013662	ATPase family, AAA domain containing 1	2.8821	7.37221	0.00294437	0.0215873
Nck2	ENSMUSG00000066877	non-catalytic region of tyrosine kinase adaptor protein 2	2.88082	7.36569	0.00328872	0.0228313
Nolc1	ENSMUSG00000015176	nucleolar and coiled-body phosphoprotein 1	2.87888	7.35581	0.00865762	0.0392985
Vcp-rs	ENSMUSG00000083327	valosin containing protein, related sequence	2.87801	7.35137	0.00228503	0.018932
Il4i1	ENSMUSG00000074141	interleukin 4 induced 1	2.87782	7.35041	0.0088228	0.0397988
Bag5	ENSMUSG00000049792	BCL2-associated athanogene 5	2.87703	7.34637	0.00328781	0.0228313
Twf1	ENSMUSG00000022451	twinfilin actin binding protein 1	2.87646	7.34349	0.00954256	0.0415986
Bicdl1	ENSMUSG00000041609	BICD family like cargo adaptor 1	2.87529	7.33753	0.00406855	0.0254066
Ppp1r21	ENSMUSG00000034709	protein phosphatase 1, regulatory subunit 21	2.87455	7.33376	0.0106112	0.0440304
Srp19	ENSMUSG00000014504	signal recognition particle 19	2.87364	7.32912	0.00126378	0.0130262
Serpinb6a	ENSMUSG00000060147	serine (or cysteine) peptidase inhibitor, clade B, member 6a	2.87333	7.32756	0.00992946	0.0423586
Cct6a	ENSMUSG00000029447	chaperonin containing Tcp1, subunit 6a (zeta)	2.86593	7.29007	0.0112926	0.0456094
Proser1	ENSMUSG00000049504	proline and serine rich 1	2.86574	7.28908	0.00172319	0.016088
Faah	ENSMUSG00000034171	fatty acid amide hydrolase	2.86462	7.28345	0.00324767	0.0226446
Eml2	ENSMUSG00000040811	echinoderm microtubule associated protein like 2	2.86363	7.27846	0.00437536	0.0265782
Astl	ENSMUSG00000050468	astacin-like metalloendopeptidase (M12 family)	2.86341	7.27734	0.00320861	0.0225644
Las1l	ENSMUSG00000057421	LAS1-like (S. cerevisiae)	2.8599	7.25967	1.10447e-05	0.00103863
Ppat	ENSMUSG00000029246	phosphoribosyl pyrophosphate amidotransferase	2.85962	7.25825	0.000506109	0.0075947
Ddost	ENSMUSG00000028757	dolichyl-di-phosphooligosaccharide-protein glycotransferase	2.85882	7.25423	0.00305764	0.0219092
Spats2	ENSMUSG00000051934	spermatogenesis associated, serine-rich 2	2.85833	7.25178	0.00449302	0.027033
Raph1	ENSMUSG00000026014	Ras association (RalGDS/AF-6) and pleckstrin homology domains 1	2.85535	7.23677	0.00291097	0.0215088
Golga1	ENSMUSG00000026754	golgi autoantigen, golgin subfamily a, 1	2.8532	7.22602	0.00415292	0.0257002
Pald1	ENSMUSG00000020092	phosphatase domain containing, paladin 1	2.85303	7.22517	0.00487966	0.0281161
Fem1a	ENSMUSG00000043683	feminization 1 homolog a (C. elegans)	2.85139	7.21695	0.00385095	0.0248672
Abhd12	ENSMUSG00000032046	abhydrolase domain containing 12	2.85045	7.21224	0.00706147	0.0346222
Casp2	ENSMUSG00000029863	caspase 2	2.84987	7.20933	0.00580619	0.0309916
Emg1	ENSMUSG00000004268	EMG1 N1-specific pseudouridine methyltransferase	2.84841	7.20208	0.00263127	0.0204177
Ddx20	ENSMUSG00000027905	DEAD (Asp-Glu-Ala-Asp) box polypeptide 20	2.84703	7.19515	0.00328514	0.0228313
Abcc4	ENSMUSG00000032849	ATP-binding cassette, sub-family C (CFTR/MRP), member 4	2.84184	7.16936	0.0108171	0.0445339
Rps2	ENSMUSG00000044533	ribosomal protein S2	2.84136	7.16698	0.00939364	0.0413987
Hacd3	ENSMUSG00000033629	3-hydroxyacyl-CoA dehydratase 3	2.84095	7.1649	0.00216709	0.0182948
Col4a2	ENSMUSG00000031503	collagen, type IV, alpha 2	2.84081	7.16421	0.00377461	0.0246048
Fam208b	ENSMUSG00000033799	family with sequence similarity 208, member B	2.84069	7.16361	0.00763445	0.0363626
Ran	ENSMUSG00000029430	RAN, member RAS oncogene family	2.83883	7.15441	0.00999872	0.0425605
Dopey1	ENSMUSG00000034973	dopey family member 1	2.83783	7.14943	0.00613348	0.0319294
Tnpo3	ENSMUSG00000012535	transportin 3	2.83592	7.14	0.00939811	0.0413987
Dpp3	ENSMUSG00000063904	dipeptidylpeptidase 3	2.83567	7.13876	0.0019323	0.0171531
Dda1	ENSMUSG00000074247	DET1 and DDB1 associated 1	2.83465	7.13372	0.00179289	0.0164551
Lamc2	ENSMUSG00000026479	laminin, gamma 2	2.83417	7.13133	0.00113865	0.0123358
Cyp1b1	ENSMUSG00000024087	cytochrome P450, family 1, subfamily b, polypeptide 1	2.83306	7.12585	0.00193822	0.0171856
Tsg101	ENSMUSG00000014402	tumor susceptibility gene 101	2.83291	7.12508	0.00389384	0.0248928
Ipo4	ENSMUSG00000002319	importin 4	2.83268	7.12394	0.00320223	0.0225405
Ppp5c	ENSMUSG00000003099	protein phosphatase 5, catalytic subunit	2.83233	7.12222	0.00212285	0.0180597
Enpp1	ENSMUSG00000037370	ectonucleotide pyrophosphatase/phosphodiesterase 1	2.83005	7.111	0.00336568	0.0230676
Mphosph6	ENSMUSG00000031843	M phase phosphoprotein 6	2.82997	7.1106	0.00452491	0.0270531
Slc25a25	ENSMUSG00000026819	solute carrier family 25 (mitochondrial carrier, phosphate carrier), member 25	2.82953	7.10842	0.00237629	0.019386
Rdh10	ENSMUSG00000025921	retinol dehydrogenase 10 (all-trans)	2.82886	7.10512	0.00160812	0.0154123
Dhx57	ENSMUSG00000035051	DEAH (Asp-Glu-Ala-Asp/His) box polypeptide 57	2.82749	7.09837	0.0105823	0.0439345
Card11	ENSMUSG00000036526	caspase recruitment domain family, member 11	2.82641	7.09305	0.00892271	0.0400967
Npc2	ENSMUSG00000021242	NPC intracellular cholesterol transporter 2	2.82456	7.08399	8.18575e-05	0.00283258
Zfp326	ENSMUSG00000029290	zinc finger protein 326	2.82322	7.07742	0.00977964	0.0419909
Mrpl39	ENSMUSG00000022889	mitochondrial ribosomal protein L39	2.82258	7.07424	0.00338002	0.0230721
Pon2	ENSMUSG00000032667	paraoxonase 2	2.82	7.06161	0.00651119	0.0329163
Nup188	ENSMUSG00000052533	nucleoporin 188	2.81788	7.05125	0.00395459	0.0250876
Fam91a1	ENSMUSG00000037119	family with sequence similarity 91, member A1	2.81775	7.05061	0.0125064	0.0486072
Vangl1	ENSMUSG00000027860	VANGL planar cell polarity 1	2.81566	7.04042	0.00119365	0.0125856
Ube2q2	ENSMUSG00000032307	ubiquitin-conjugating enzyme E2Q family member 2	2.81547	7.03948	0.00285344	0.0212367
Rbm28	ENSMUSG00000029701	RNA binding motif protein 28	2.81378	7.03122	0.00869924	0.0394432
Eif3b	ENSMUSG00000056076	eukaryotic translation initiation factor 3, subunit B	2.81228	7.02396	0.000925741	0.0109509
Ndufb4	ENSMUSG00000022820	NADH:ubiquinone oxidoreductase subunit B4	2.80863	7.0062	0.0114576	0.0459333
Anxa7	ENSMUSG00000021814	annexin A7	2.80608	6.99383	0.0100187	0.0426218
Eef1d	ENSMUSG00000055762	eukaryotic translation elongation factor 1 delta (guanine nucleotide exchange protein)	2.80526	6.98983	0.0108066	0.0445339
Emc3	ENSMUSG00000030286	ER membrane protein complex subunit 3	2.80211	6.97458	0.00268217	0.0204869
Ufsp2	ENSMUSG00000031634	UFM1-specific peptidase 2	2.80193	6.97371	0.00776093	0.0367034
Nr1d2	ENSMUSG00000021775	nuclear receptor subfamily 1, group D, member 2	2.80079	6.96824	0.000108199	0.00321669
Rnf43	ENSMUSG00000034177	ring finger protein 43	2.80068	6.96767	0.0026435	0.0204285
Lbp	ENSMUSG00000016024	lipopolysaccharide binding protein	2.79883	6.95875	0.0126373	0.0488778
Ndufa9	ENSMUSG00000000399	NADH:ubiquinone oxidoreductase subunit A9	2.79846	6.957	0.00387184	0.0248834
Gys1	ENSMUSG00000003865	glycogen synthase 1, muscle	2.798	6.95475	0.00823051	0.0382499
Txlng	ENSMUSG00000038344	taxilin gamma	2.79731	6.95143	0.00587942	0.0312566
Prnp	ENSMUSG00000079037	prion protein	2.79678	6.94888	0.00897256	0.0402968
Scmh1	ENSMUSG00000000085	sex comb on midleg homolog 1	2.79535	6.94199	0.00601131	0.0316251
Nol7	ENSMUSG00000063200	nucleolar protein 7	2.79427	6.9368	0.00323694	0.0226168
Scpep1	ENSMUSG00000000278	serine carboxypeptidase 1	2.79279	6.9297	0.00764233	0.0363685
Parl	ENSMUSG00000033918	presenilin associated, rhomboid-like	2.7914	6.92302	0.00237962	0.019386
Dennd1a	ENSMUSG00000035392	DENN/MADD domain containing 1A	2.79052	6.91879	0.00516253	0.0289591
Lncpint	ENSMUSG00000044471	long non-protein coding RNA, Trp53 induced transcript	2.78969	6.91482	0.0040872	0.0255021
Mydgf	ENSMUSG00000019579	myeloid derived growth factor	2.78881	6.91059	0.00163958	0.0156545
Drap1	ENSMUSG00000024914	Dr1 associated protein 1 (negative cofactor 2 alpha)	2.78876	6.91037	0.00730474	0.0354197
Phb2	ENSMUSG00000004264	prohibitin 2	2.78748	6.90425	0.00720641	0.0351264
Mettl14	ENSMUSG00000028114	methyltransferase like 14	2.7874	6.90387	0.00623876	0.032284
Atf7	ENSMUSG00000099083	activating transcription factor 7	2.78592	6.89677	0.00840919	0.0386267
Nelfcd	ENSMUSG00000016253	negative elongation factor complex member C/D, Th1l	2.7852	6.89334	0.0036891	0.0242913
S100a16	ENSMUSG00000074457	S100 calcium binding protein A16	2.7839	6.88713	0.00287033	0.0213124
Tomm40	ENSMUSG00000002984	translocase of outer mitochondrial membrane 40	2.7806	6.87136	0.00338105	0.0230721
Sec14l4	ENSMUSG00000019368	SEC14-like lipid binding 4	2.77804	6.85921	0.00982672	0.0420646
Ldlrad4	ENSMUSG00000024544	low density lipoprotein receptor class A domain containing 4	2.77676	6.85311	0.00451376	0.0270432
Arf2	ENSMUSG00000062421	ADP-ribosylation factor 2	2.77544	6.84685	0.00917308	0.0408345
Timm44	ENSMUSG00000002949	translocase of inner mitochondrial membrane 44	2.77518	6.84561	0.000256515	0.00516476
Rgl3	ENSMUSG00000040146	ral guanine nucleotide dissociation stimulator-like 3	2.77405	6.84026	0.00170823	0.0160076
Wdr5	ENSMUSG00000026917	WD repeat domain 5	2.77369	6.83853	0.00590635	0.0313558
Hs2st1	ENSMUSG00000040151	heparan sulfate 2-O-sulfotransferase 1	2.7733	6.83669	6.50859e-05	0.00244508
Arhgef26	ENSMUSG00000036885	Rho guanine nucleotide exchange factor (GEF) 26	2.77325	6.83645	0.00914978	0.0407787
Dzip1l	ENSMUSG00000037784	DAZ interacting protein 1-like	2.77172	6.82922	0.00392825	0.0250253
Abhd4	ENSMUSG00000040997	abhydrolase domain containing 4	2.77081	6.82493	0.0116276	0.0463943
Urgcp	ENSMUSG00000049680	upregulator of cell proliferation	2.76965	6.81943	0.00358545	0.0238432
Cc2d1a	ENSMUSG00000036686	coiled-coil and C2 domain containing 1A	2.76874	6.81514	0.00249274	0.0199003
Dap	ENSMUSG00000039168	death-associated protein	2.7685	6.81401	0.00912119	0.0407231
Plaa	ENSMUSG00000028577	phospholipase A2, activating protein	2.76781	6.81072	0.00631954	0.0325227
Hif1an	ENSMUSG00000036450	hypoxia-inducible factor 1, alpha subunit inhibitor	2.76461	6.79564	0.00984251	0.0421084
Man2c1	ENSMUSG00000032295	mannosidase, alpha, class 2C, member 1	2.7645	6.7951	0.00247605	0.019844
Kpna6	ENSMUSG00000003731	karyopherin (importin) alpha 6	2.76206	6.78366	0.00956366	0.0415986
Cep192	ENSMUSG00000024542	centrosomal protein 192	2.762	6.78338	0.0128671	0.0492407
Glrx3	ENSMUSG00000031068	glutaredoxin 3	2.76172	6.78205	0.0056377	0.0304086
Gpatch2	ENSMUSG00000039210	G patch domain containing 2	2.7571	6.76036	0.0112202	0.045519
Myh7	ENSMUSG00000053093	myosin, heavy polypeptide 7, cardiac muscle, beta	2.75478	6.7495	0.0127798	0.048956
Larp4	ENSMUSG00000023025	La ribonucleoprotein domain family, member 4	2.75462	6.74876	0.0104969	0.0436756
Dse	ENSMUSG00000039497	dermatan sulfate epimerase	2.75372	6.74453	0.00403583	0.0253485
Aspm	ENSMUSG00000033952	abnormal spindle microtubule assembly	2.75236	6.73819	0.00507507	0.0286791
Stn1	ENSMUSG00000042694	STN1, CST complex subunit	2.75136	6.73351	0.00126062	0.0130201
Cpox	ENSMUSG00000022742	coproporphyrinogen oxidase	2.75032	6.72868	0.00302662	0.0218107
Mrgbp	ENSMUSG00000027569	MRG/MORF4L binding protein	2.75006	6.72745	0.00275113	0.0208772
Mthfsd	ENSMUSG00000031816	methenyltetrahydrofolate synthetase domain containing	2.74845	6.71996	0.00378313	0.024618
Pelp1	ENSMUSG00000018921	proline, glutamic acid and leucine rich protein 1	2.74832	6.71935	0.0036363	0.024054
Map3k4	ENSMUSG00000014426	mitogen-activated protein kinase kinase kinase 4	2.74612	6.70912	0.0101172	0.0428004
Tubgcp3	ENSMUSG00000000759	tubulin, gamma complex associated protein 3	2.74514	6.70454	0.0109219	0.0447077
Tmco1	ENSMUSG00000052428	transmembrane and coiled-coil domains 1	2.74347	6.6968	0.0097929	0.0419909
Uqcc1	ENSMUSG00000005882	ubiquinol-cytochrome c reductase complex assembly factor 1	2.74285	6.69393	0.00575779	0.0308261
Psmb4	ENSMUSG00000005779	proteasome (prosome, macropain) subunit, beta type 4	2.73702	6.6669	0.0028236	0.0211938
Rab18	ENSMUSG00000073639	RAB18, member RAS oncogene family	2.73644	6.66423	0.00654227	0.0329953
Zfp618	ENSMUSG00000028358	zinc finger protein 618	2.73526	6.65878	1.47576e-05	0.00111688
Pitrm1	ENSMUSG00000021193	pitrilysin metallepetidase 1	2.73495	6.65735	0.00700986	0.0344629
Capn15	ENSMUSG00000037326	calpain 15	2.73447	6.65516	0.0021606	0.0182603
Thada	ENSMUSG00000024251	thyroid adenoma associated	2.73225	6.6449	0.0082393	0.0382499
Erlin2	ENSMUSG00000031483	ER lipid raft associated 2	2.73204	6.64396	0.00985209	0.0421256
Fzd5	ENSMUSG00000045005	frizzled class receptor 5	2.73083	6.63839	0.00900581	0.0403744
Mrps10	ENSMUSG00000034729	mitochondrial ribosomal protein S10	2.73079	6.63819	0.00643318	0.0327535
Adamtsl4	ENSMUSG00000015850	ADAMTS-like 4	2.7306	6.63731	0.00448038	0.0269927
Dnajb11	ENSMUSG00000004460	DnaJ heat shock protein family (Hsp40) member B11	2.73059	6.63725	0.0112387	0.045519
Gfm1	ENSMUSG00000027774	G elongation factor, mitochondrial 1	2.72958	6.63263	0.00400385	0.0252312
Plekhb1	ENSMUSG00000030701	pleckstrin homology domain containing, family B (evectins) member 1	2.72923	6.63099	0.00174225	0.0161863
Jade3	ENSMUSG00000037315	jade family PHD finger 3	2.72907	6.63027	0.00211568	0.0180597
Zcrb1	ENSMUSG00000022635	zinc finger CCHC-type and RNA binding motif 1	2.72801	6.62541	0.0115295	0.0460887
Rab3il1	ENSMUSG00000024663	RAB3A interacting protein (rabin3)-like 1	2.72332	6.60392	0.0111363	0.0452921
Eif2s1	ENSMUSG00000021116	eukaryotic translation initiation factor 2, subunit 1 alpha	2.7232	6.60338	0.000848338	0.0104403
Pwp2	ENSMUSG00000032834	PWP2 periodic tryptophan protein homolog (yeast)	2.72259	6.60058	0.00532096	0.0294059
Pomp	ENSMUSG00000029649	proteasome maturation protein	2.72039	6.59051	0.00628335	0.0324704
Smpd3	ENSMUSG00000031906	sphingomyelin phosphodiesterase 3, neutral	2.72	6.58871	0.00429748	0.026316
Bicc1	ENSMUSG00000014329	BicC family RNA binding protein 1	2.71979	6.58775	0.0109098	0.0446826
Etv5	ENSMUSG00000013089	ets variant 5	2.7167	6.57369	0.00522111	0.0291253
Polr1b	ENSMUSG00000027395	polymerase (RNA) I polypeptide B	2.71516	6.56665	0.00757717	0.0361957
Togaram1	ENSMUSG00000035614	TOG array regulator of axonemal microtubules 1	2.7151	6.56638	0.0102929	0.0433024
Ppp2r5b	ENSMUSG00000024777	protein phosphatase 2, regulatory subunit B', beta	2.71273	6.5556	0.00280678	0.0210884
Mgat4b	ENSMUSG00000036620	mannoside acetylglucosaminyltransferase 4, isoenzyme B	2.71093	6.54744	0.0029019	0.0214837
Stx8	ENSMUSG00000020903	syntaxin 8	2.71057	6.54579	0.00680472	0.033783
Ddx19a	ENSMUSG00000015023	DEAD (Asp-Glu-Ala-Asp) box polypeptide 19a	2.70551	6.5229	0.0120001	0.0474064
Zfp266	ENSMUSG00000060510	zinc finger protein 266	2.70365	6.51449	0.00294041	0.0215873
Prepl	ENSMUSG00000024127	prolyl endopeptidase-like	2.70363	6.51438	0.00648387	0.0328351
Fh1	ENSMUSG00000026526	fumarate hydratase 1	2.70093	6.50223	0.00106506	0.0119618
Ddhd1	ENSMUSG00000037697	DDHD domain containing 1	2.69982	6.4972	0.00963059	0.0417197
Wdr46	ENSMUSG00000024312	WD repeat domain 46	2.69935	6.49508	0.00250967	0.0199851
Zfyve9	ENSMUSG00000034557	zinc finger, FYVE domain containing 9	2.69927	6.49473	0.00633144	0.0325227
Nvl	ENSMUSG00000026516	nuclear VCP-like	2.69725	6.48563	0.00543516	0.0297717
Psma6	ENSMUSG00000021024	proteasome (prosome, macropain) subunit, alpha type 6	2.69602	6.48012	0.00661722	0.033222
Muc5b	ENSMUSG00000066108	mucin 5, subtype B, tracheobronchial	2.69401	6.47111	0.00943951	0.0414506
Cops5	ENSMUSG00000025917	COP9 signalosome subunit 5	2.69096	6.45741	0.00455228	0.0271538
Bicd1	ENSMUSG00000003452	BICD cargo adaptor 1	2.68993	6.45281	0.00257256	0.020085
Ift46	ENSMUSG00000002031	intraflagellar transport 46	2.6863	6.43658	0.00540953	0.0296527
Slc7a6	ENSMUSG00000031904	solute carrier family 7 (cationic amino acid transporter, y+ system), member 6	2.68601	6.43532	1.56767e-05	0.00115383
Minos1	ENSMUSG00000050608	mitochondrial inner membrane organizing system 1	2.68447	6.42847	0.00771285	0.0365445
Tpd52l2	ENSMUSG00000000827	tumor protein D52-like 2	2.68395	6.42613	0.00941218	0.0414365
Nupl1	ENSMUSG00000063895	nucleoporin like 1	2.68199	6.41739	0.0093223	0.0412562
Tbc1d22b	ENSMUSG00000042203	TBC1 domain family, member 22B	2.68166	6.41592	0.00268349	0.0204869
Mcu	ENSMUSG00000009647	mitochondrial calcium uniporter	2.68058	6.41115	0.0127004	0.0489205
Tfg	ENSMUSG00000022757	Trk-fused gene	2.67988	6.40801	0.00925722	0.0411095
Impa1	ENSMUSG00000027531	inositol (myo)-1(or 4)-monophosphatase 1	2.67946	6.40616	0.00303447	0.0218464
Anapc7	ENSMUSG00000029466	anaphase promoting complex subunit 7	2.6793	6.40545	0.00338123	0.0230721
Ndufb7	ENSMUSG00000033938	NADH:ubiquinone oxidoreductase subunit B7	2.67693	6.39492	0.00638748	0.0326325
Ppp1r8	ENSMUSG00000028882	protein phosphatase 1, regulatory subunit 8	2.67651	6.39307	0.00270957	0.0206444
Lmf2	ENSMUSG00000022614	lipase maturation factor 2	2.67577	6.38981	0.00467031	0.0275563
Dnajc18	ENSMUSG00000024350	DnaJ heat shock protein family (Hsp40) member C18	2.67391	6.38157	0.00746133	0.0358354
Bzw2	ENSMUSG00000020547	basic leucine zipper and W2 domains 2	2.67383	6.38119	0.0045525	0.0271538
Rab12	ENSMUSG00000023460	RAB12, member RAS oncogene family	2.67372	6.38071	0.0108207	0.0445339
Pde7a	ENSMUSG00000069094	phosphodiesterase 7A	2.67186	6.37252	0.00510031	0.0287689
Aimp1	ENSMUSG00000028029	aminoacyl tRNA synthetase complex-interacting multifunctional protein 1	2.67116	6.36942	0.00240127	0.0194758
Tial1	ENSMUSG00000030846	Tia1 cytotoxic granule-associated RNA binding protein-like 1	2.67106	6.36897	0.00744034	0.0357674
Cops4	ENSMUSG00000035297	COP9 signalosome subunit 4	2.66911	6.36039	0.0126289	0.0488778
Rsrc1	ENSMUSG00000034544	arginine/serine-rich coiled-coil 1	2.6691	6.36031	0.00115233	0.0123562
Zfp467	ENSMUSG00000068551	zinc finger protein 467	2.6681	6.35591	0.00800772	0.0375427
Tnfaip1	ENSMUSG00000017615	tumor necrosis factor, alpha-induced protein 1 (endothelial)	2.66749	6.35324	0.00847792	0.0387876
Rian	ENSMUSG00000097451	RNA imprinted and accumulated in nucleus	2.66734	6.35259	0.00285453	0.0212367
Orc2	ENSMUSG00000026037	origin recognition complex, subunit 2	2.66717	6.35182	0.00945145	0.0414506
Zfp706	ENSMUSG00000062397	zinc finger protein 706	2.66377	6.33685	0.00115917	0.0123637
Tbc1d24	ENSMUSG00000036473	TBC1 domain family, member 24	2.66311	6.33395	0.00945134	0.0414506
Usp39	ENSMUSG00000056305	ubiquitin specific peptidase 39	2.66225	6.33022	0.00516961	0.0289591
Uhrf1bp1	ENSMUSG00000039512	UHRF1 (ICBP90) binding protein 1	2.66192	6.32874	0.0109444	0.0447757
Noc3l	ENSMUSG00000024999	NOC3 like DNA replication regulator	2.66002	6.3204	0.00798415	0.0374571
Golm1	ENSMUSG00000021556	golgi membrane protein 1	2.65981	6.31951	0.00115495	0.0123637
Map3k13	ENSMUSG00000033618	mitogen-activated protein kinase kinase kinase 13	2.65933	6.31739	0.0120353	0.0475208
Tfdp2	ENSMUSG00000032411	transcription factor Dp 2	2.65618	6.30363	0.00684787	0.0339165
Hs3st1	ENSMUSG00000051022	heparan sulfate (glucosamine) 3-O-sulfotransferase 1	2.65446	6.29612	0.0123156	0.0482503
Prdm1	ENSMUSG00000038151	PR domain containing 1, with ZNF domain	2.65242	6.28719	0.00474443	0.0276459
Chdh	ENSMUSG00000015970	choline dehydrogenase	2.6523	6.28668	0.00591858	0.0313861
Tmed2	ENSMUSG00000029390	transmembrane p24 trafficking protein 2	2.65102	6.28111	0.00264158	0.0204285
Bahd1	ENSMUSG00000040007	bromo adjacent homology domain containing 1	2.65082	6.28025	0.010344	0.0433849
Ctdspl	ENSMUSG00000047409	CTD (carboxy-terminal domain, RNA polymerase II, polypeptide A) small phosphatase-like	2.65027	6.27786	0.00642059	0.0327113
Vldlr	ENSMUSG00000024924	very low density lipoprotein receptor	2.64946	6.27434	0.00649749	0.0328821
Setdb1	ENSMUSG00000015697	SET domain, bifurcated 1	2.64938	6.27396	0.00959316	0.0416528
Cfap20	ENSMUSG00000031796	cilia and flagella associated protein 20	2.64915	6.27296	0.00252226	0.0200154
Mettl3	ENSMUSG00000022160	methyltransferase like 3	2.64845	6.26995	0.00618546	0.0321116
Hmg20b	ENSMUSG00000020232	high mobility group 20B	2.64777	6.26698	0.0126571	0.0488778
Ndor1	ENSMUSG00000006471	NADPH dependent diflavin oxidoreductase 1	2.64749	6.26575	0.00636607	0.0326089
Ap1ar	ENSMUSG00000074238	adaptor-related protein complex 1 associated regulatory protein	2.64708	6.26397	0.00533768	0.0294505
Nmt2	ENSMUSG00000026643	N-myristoyltransferase 2	2.64688	6.2631	0.000202431	0.00454033
Acadm	ENSMUSG00000062908	acyl-Coenzyme A dehydrogenase, medium chain	2.64591	6.2589	0.0125651	0.0487959
Mob3b	ENSMUSG00000073910	MOB kinase activator 3B	2.64136	6.23918	0.00681749	0.0338242
Pcgf2	ENSMUSG00000018537	polycomb group ring finger 2	2.64062	6.23598	0.00438319	0.0266045
Ddx49	ENSMUSG00000057788	DEAD (Asp-Glu-Ala-Asp) box polypeptide 49	2.6404	6.23505	0.0040534	0.0254054
Sh3rf1	ENSMUSG00000031642	SH3 domain containing ring finger 1	2.63934	6.23047	0.000756462	0.00995022
Pomgnt1	ENSMUSG00000028700	protein O-linked mannose beta 1,2-N-acetylglucosaminyltransferase	2.63731	6.22171	0.00758242	0.036198
Klhl42	ENSMUSG00000040102	kelch-like 42	2.63713	6.22095	0.00352437	0.0236206
Park7	ENSMUSG00000028964	Parkinson disease (autosomal recessive, early onset) 7	2.63681	6.21953	0.00567281	0.0305004
Rwdd4a	ENSMUSG00000031568	RWD domain containing 4A	2.63579	6.21514	0.00433036	0.0264319
Irs1	ENSMUSG00000055980	insulin receptor substrate 1	2.63537	6.21336	0.00582293	0.0310433
Tsc22d1	ENSMUSG00000022010	TSC22 domain family, member 1	2.63508	6.2121	0.000750674	0.00993792
Gga2	ENSMUSG00000030872	golgi associated, gamma adaptin ear containing, ARF binding protein 2	2.6344	6.20915	0.0125088	0.0486072
Sugp1	ENSMUSG00000011306	SURP and G patch domain containing 1	2.63382	6.20666	0.00816669	0.0380738
Shb	ENSMUSG00000044813	src homology 2 domain-containing transforming protein B	2.63099	6.19453	0.00503397	0.0285434
Ifi207	ENSMUSG00000073490	interferon activated gene 207	2.62945	6.18789	0.0116412	0.0464008
Map4k5	ENSMUSG00000034761	mitogen-activated protein kinase kinase kinase kinase 5	2.62804	6.18186	0.0107438	0.0443861
Tmem165	ENSMUSG00000029234	transmembrane protein 165	2.62768	6.1803	0.00835269	0.0384723
Cbfa2t2	ENSMUSG00000038533	core-binding factor, runt domain, alpha subunit 2, translocated to, 2 (human)	2.62522	6.16979	0.00721936	0.0351283
Exosc9	ENSMUSG00000027714	exosome component 9	2.62406	6.16483	0.0102846	0.0432911
Plxna2	ENSMUSG00000026640	plexin A2	2.6235	6.16243	0.000122875	0.00343733
Tcim	ENSMUSG00000056313	transcriptional and immune response regulator	2.62242	6.15783	0.00764799	0.0363685
Tdrd3	ENSMUSG00000022019	tudor domain containing 3	2.62145	6.15368	0.00667932	0.033423
Lpcat1	ENSMUSG00000021608	lysophosphatidylcholine acyltransferase 1	2.62027	6.14863	0.00271987	0.0207022
Stx3	ENSMUSG00000041488	syntaxin 3	2.61999	6.14747	0.00594177	0.0313939
Zfp629	ENSMUSG00000045639	zinc finger protein 629	2.61583	6.12974	0.00510409	0.0287689
Disp2	ENSMUSG00000040035	dispatched RND tramsporter family member 2	2.61564	6.12893	0.0097882	0.0419909
Rint1	ENSMUSG00000028999	RAD50 interactor 1	2.61115	6.10993	0.00739662	0.0357379
Gtf2f2	ENSMUSG00000067995	general transcription factor IIF, polypeptide 2	2.60789	6.09613	0.00514861	0.0289123
Keap1	ENSMUSG00000003308	kelch-like ECH-associated protein 1	2.60534	6.08535	0.00459076	0.0272961
Wdr45	ENSMUSG00000039382	WD repeat domain 45	2.60402	6.07976	0.00484786	0.0280524
Atp9a	ENSMUSG00000027546	ATPase, class II, type 9A	2.60241	6.07302	4.99487e-05	0.00220152
Pawr	ENSMUSG00000035873	PRKC, apoptosis, WT1, regulator	2.60027	6.06402	0.000530424	0.00778355
Lars	ENSMUSG00000024493	leucyl-tRNA synthetase	2.5977	6.05323	0.0062821	0.0324704
Deaf1	ENSMUSG00000058886	DEAF1, transcription factor	2.59546	6.04381	0.00559981	0.0303446
Sh3bp4	ENSMUSG00000036206	SH3-domain binding protein 4	2.59454	6.03997	0.00265622	0.0204435
Snx5	ENSMUSG00000027423	sorting nexin 5	2.5943	6.03895	0.00492883	0.0282217
Kdsr	ENSMUSG00000009905	3-ketodihydrosphingosine reductase	2.59305	6.03374	0.0060953	0.0318459
Cmpk1	ENSMUSG00000028719	cytidine monophosphate (UMP-CMP) kinase 1	2.59075	6.02412	0.0107	0.044274
Mlec	ENSMUSG00000048578	malectin	2.59033	6.02237	0.00578867	0.0309401
Tbrg1	ENSMUSG00000011114	transforming growth factor beta regulated gene 1	2.58734	6.00991	0.00901961	0.0404123
Sae1	ENSMUSG00000052833	SUMO1 activating enzyme subunit 1	2.58719	6.00926	0.00881727	0.0397988
Zfp24	ENSMUSG00000051469	zinc finger protein 24	2.58579	6.00345	0.00925398	0.0411095
Nol8	ENSMUSG00000021392	nucleolar protein 8	2.5856	6.00264	0.010674	0.044194
Alpk1	ENSMUSG00000028028	alpha-kinase 1	2.58488	5.99965	0.0102523	0.0432273
Plekhm2	ENSMUSG00000028917	pleckstrin homology domain containing, family M (with RUN domain) member 2	2.58475	5.99911	0.0113955	0.0457814
Dars	ENSMUSG00000026356	aspartyl-tRNA synthetase	2.5824	5.98936	0.0055829	0.0302746
Cdc25a	ENSMUSG00000032477	cell division cycle 25A	2.58214	5.98826	0.00981198	0.042049
Rpl37a	ENSMUSG00000046330	ribosomal protein L37a	2.58041	5.98108	0.0130732	0.0497031
Sarnp	ENSMUSG00000078427	SAP domain containing ribonucleoprotein	2.58018	5.98015	0.0121736	0.0478059
Mrpl12	ENSMUSG00000039640	mitochondrial ribosomal protein L12	2.57977	5.97845	0.00225983	0.0188468
Arl1	ENSMUSG00000060904	ADP-ribosylation factor-like 1	2.57885	5.97464	0.00865714	0.0392985
Slc25a1	ENSMUSG00000003528	solute carrier family 25 (mitochondrial carrier, citrate transporter), member 1	2.57881	5.97446	0.00474717	0.0276459
Mrpl37	ENSMUSG00000028622	mitochondrial ribosomal protein L37	2.57722	5.96788	0.00675536	0.0336481
Aqp5	ENSMUSG00000044217	aquaporin 5	2.57704	5.96712	0.00395412	0.0250876
Mrps5	ENSMUSG00000027374	mitochondrial ribosomal protein S5	2.57675	5.96594	0.00932768	0.0412562
Cbx3	ENSMUSG00000029836	chromobox 3	2.57543	5.96048	0.00953296	0.0415986
Nln	ENSMUSG00000021710	neurolysin (metallopeptidase M3 family)	2.57358	5.95286	0.00768924	0.0364554
Slc39a4	ENSMUSG00000063354	solute carrier family 39 (zinc transporter), member 4	2.57097	5.94208	0.00656777	0.0330707
Dok4	ENSMUSG00000040631	docking protein 4	2.57034	5.93951	0.00600119	0.0315938
Asna1	ENSMUSG00000052456	arsA arsenite transporter, ATP-binding, homolog 1 (bacterial)	2.56784	5.9292	0.00932175	0.0412562
Smim10l1	ENSMUSG00000072704	small integral membrane protein 10 like 1	2.56769	5.9286	0.00930875	0.0412447
Tmtc2	ENSMUSG00000036019	transmembrane and tetratricopeptide repeat containing 2	2.5667	5.92451	0.00754498	0.0360646
Cnih4	ENSMUSG00000062169	cornichon family AMPA receptor auxiliary protein 4	2.56659	5.92407	0.00466868	0.0275563
Tjap1	ENSMUSG00000012296	tight junction associated protein 1	2.56592	5.92133	0.00598528	0.0315538
Morc4	ENSMUSG00000031434	microrchidia 4	2.56393	5.91317	0.0104124	0.0434433
Pmepa1	ENSMUSG00000038400	prostate transmembrane protein, androgen induced 1	2.56356	5.91163	0.000409415	0.0067327
Nsa2	ENSMUSG00000060739	NSA2 ribosome biogenesis homolog	2.56352	5.91147	0.0131683	0.0498147
Slc24a4	ENSMUSG00000041771	solute carrier family 24 (sodium/potassium/calcium exchanger), member 4	2.56189	5.90482	0.0111876	0.0454276
Usp31	ENSMUSG00000063317	ubiquitin specific peptidase 31	2.56103	5.90127	0.00856559	0.0390048
Bccip	ENSMUSG00000030983	BRCA2 and CDKN1A interacting protein	2.55798	5.88881	0.0131371	0.0497907
Acad9	ENSMUSG00000027710	acyl-Coenzyme A dehydrogenase family, member 9	2.55789	5.88845	0.00295484	0.0216014
Slx4	ENSMUSG00000039738	SLX4 structure-specific endonuclease subunit homolog (S. cerevisiae)	2.55513	5.87721	0.000328262	0.00581438
Pole3	ENSMUSG00000028394	polymerase (DNA directed), epsilon 3 (p17 subunit)	2.55411	5.87306	0.00476695	0.0276921
Dus1l	ENSMUSG00000025155	dihydrouridine synthase 1-like (S. cerevisiae)	2.55274	5.86749	0.00563051	0.0304086
Mlh3	ENSMUSG00000021245	mutL homolog 3	2.5522	5.86529	0.0127609	0.0489205
Sumo3	ENSMUSG00000020265	small ubiquitin-like modifier 3	2.55139	5.86197	0.0127488	0.0489205
Arl6ip4	ENSMUSG00000029404	ADP-ribosylation factor-like 6 interacting protein 4	2.54693	5.84391	0.00823609	0.0382499
Cdk16	ENSMUSG00000031065	cyclin-dependent kinase 16	2.54472	5.83495	0.0104269	0.0434797
Ccny	ENSMUSG00000024286	cyclin Y	2.54462	5.83455	0.0131196	0.0497794
Bad	ENSMUSG00000024959	BCL2-associated agonist of cell death	2.5435	5.83	0.00469068	0.0276087
Tshz1	ENSMUSG00000046982	teashirt zinc finger family member 1	2.54337	5.8295	0.00955078	0.0415986
Agpat3	ENSMUSG00000001211	1-acylglycerol-3-phosphate O-acyltransferase 3	2.5433	5.82923	0.00204391	0.0176882
Ndufv2	ENSMUSG00000024099	NADH:ubiquinone oxidoreductase core subunit V2	2.54111	5.82035	0.00445108	0.0268874
Epb41l4a	ENSMUSG00000024376	erythrocyte membrane protein band 4.1 like 4a	2.54109	5.82028	0.00400168	0.0252312
Cdhr2	ENSMUSG00000034918	cadherin-related family member 2	2.53975	5.8149	0.00136022	0.0136717
Pik3r4	ENSMUSG00000032571	phosphoinositide-3-kinase regulatory subunit 4	2.53886	5.81131	0.00937727	0.041379
Zfp513	ENSMUSG00000043059	zinc finger protein 513	2.53852	5.80994	0.0119505	0.0472959
Eya2	ENSMUSG00000017897	EYA transcriptional coactivator and phosphatase 2	2.53849	5.80979	0.000857443	0.0104973
Nprl3	ENSMUSG00000020289	nitrogen permease regulator-like 3	2.53808	5.80816	0.00845732	0.0387167
Zdhhc13	ENSMUSG00000030471	zinc finger, DHHC domain containing 13	2.53732	5.80511	0.00492735	0.0282217
Epcam	ENSMUSG00000045394	epithelial cell adhesion molecule	2.53517	5.79646	0.00635299	0.0325859
Rusc2	ENSMUSG00000035969	RUN and SH3 domain containing 2	2.53205	5.78395	0.00947552	0.0414506
Atp5j2	ENSMUSG00000038690	ATP synthase, H+ transporting, mitochondrial F0 complex, subunit F2	2.5319	5.78332	0.00549182	0.0299521
Utp11	ENSMUSG00000028907	UTP11 small subunit processome component	2.53039	5.77727	0.00999203	0.0425559
Dazap1	ENSMUSG00000069565	DAZ associated protein 1	2.53023	5.77664	0.0120555	0.047547
Lama5	ENSMUSG00000015647	laminin, alpha 5	2.52839	5.76929	0.00203657	0.0176763
2002-03-01	ENSMUSG00000073481	mitochondrial amidoxime reducing component 2	2.52811	5.76816	0.0129582	0.0494642
Lyar	ENSMUSG00000067367	Ly1 antibody reactive clone	2.52808	5.76805	0.00907222	0.0406001
Prps1l3	ENSMUSG00000079104	phosphoribosyl pyrophosphate synthetase 1-like 3	2.52723	5.76462	0.0025478	0.0200154
Lama3	ENSMUSG00000024421	laminin, alpha 3	2.52306	5.74798	5.50293e-05	0.00228062
Efna1	ENSMUSG00000027954	ephrin A1	2.52305	5.74797	0.00765173	0.0363685
Pepd	ENSMUSG00000063931	peptidase D	2.52271	5.74662	0.0101117	0.0428004
Gna11	ENSMUSG00000034781	guanine nucleotide binding protein, alpha 11	2.51981	5.73508	0.00704795	0.0346052
Dhx36	ENSMUSG00000027770	DEAH (Asp-Glu-Ala-His) box polypeptide 36	2.51944	5.73358	0.0108964	0.0446518
St7	ENSMUSG00000029534	suppression of tumorigenicity 7	2.51928	5.73296	0.0104933	0.0436756
Msmo1	ENSMUSG00000031604	methylsterol monoxygenase 1	2.51832	5.72913	0.0123318	0.0482639
Abcd3	ENSMUSG00000028127	ATP-binding cassette, sub-family D (ALD), member 3	2.51552	5.71805	0.00114483	0.0123358
Tbc1d30	ENSMUSG00000052302	TBC1 domain family, member 30	2.51496	5.71581	0.00472109	0.0276443
Fn1	ENSMUSG00000026193	fibronectin 1	2.51396	5.71185	0.00353327	0.0236206
Kctd9	ENSMUSG00000034327	potassium channel tetramerisation domain containing 9	2.5082	5.68911	0.0125006	0.0486072
Nlgn2	ENSMUSG00000051790	neuroligin 2	2.50712	5.68483	0.00283637	0.0212244
Spred2	ENSMUSG00000045671	sprouty-related, EVH1 domain containing 2	2.50363	5.6711	0.00910764	0.0407105
Mios	ENSMUSG00000042447	meiosis regulator for oocyte development	2.5023	5.66587	0.005693	0.030544
Uck1	ENSMUSG00000002550	uridine-cytidine kinase 1	2.50095	5.66057	0.00428197	0.0262811
Ltv1	ENSMUSG00000019814	LTV1 ribosome biogenesis factor	2.49268	5.62822	0.0125771	0.0487959
Hlcs	ENSMUSG00000040820	holocarboxylase synthetase (biotin-	2.49177	5.62469	0.00741063	0.0357379
Slc39a1	ENSMUSG00000052310	solute carrier family 39 (zinc transporter), member 1	2.49087	5.62117	0.0108902	0.0446502
Asb6	ENSMUSG00000039483	ankyrin repeat and SOCS box-containing 6	2.48972	5.61668	0.011851	0.0470855
Med10	ENSMUSG00000021598	mediator complex subunit 10	2.48969	5.61659	0.00996845	0.0424794
Atic	ENSMUSG00000026192	5-aminoimidazole-4-carboxamide ribonucleotide formyltransferase/IMP cyclohydrolase	2.48923	5.6148	0.00638292	0.0326325
Uri1	ENSMUSG00000030421	URI1, prefoldin-like chaperone	2.48807	5.61025	0.0111022	0.0451774
Sh3glb2	ENSMUSG00000026860	SH3-domain GRB2-like endophilin B2	2.48776	5.60908	0.00568878	0.030543
Fgd6	ENSMUSG00000020021	FYVE, RhoGEF and PH domain containing 6	2.48592	5.60192	0.000272522	0.0052685
Tti1	ENSMUSG00000027650	TELO2 interacting protein 1	2.48149	5.58473	0.0118603	0.0470855
Mavs	ENSMUSG00000037523	mitochondrial antiviral signaling protein	2.47966	5.57767	0.00767245	0.0364117
Pdgfa	ENSMUSG00000025856	platelet derived growth factor, alpha	2.47802	5.57133	0.00556587	0.0302472
Cracr2b	ENSMUSG00000048200	calcium release activated channel regulator 2B	2.47698	5.56731	0.00923384	0.0410568
Ino80b	ENSMUSG00000030034	INO80 complex subunit B	2.47617	5.56417	0.00967563	0.0418628
Hnrnpab	ENSMUSG00000020358	heterogeneous nuclear ribonucleoprotein A/B	2.475	5.55969	0.00854052	0.0389565
Papss1	ENSMUSG00000028032	3'-phosphoadenosine 5'-phosphosulfate synthase 1	2.47494	5.55944	0.0123621	0.0483325
Tab1	ENSMUSG00000022414	TGF-beta activated kinase 1/MAP3K7 binding protein 1	2.47394	5.55559	0.0112907	0.0456094
Mdh1	ENSMUSG00000020321	malate dehydrogenase 1, NAD (soluble)	2.46809	5.53309	0.00863718	0.0392557
Spata5	ENSMUSG00000027722	spermatogenesis associated 5	2.46768	5.53154	0.00915881	0.0407949
Itfg2	ENSMUSG00000001518	integrin alpha FG-GAP repeat containing 2	2.46518	5.52198	0.010381	0.0434433
Spred1	ENSMUSG00000027351	sprouty protein with EVH-1 domain 1, related sequence	2.46511	5.52169	0.0017205	0.016088
Impa2	ENSMUSG00000024525	inositol (myo)-1(or 4)-monophosphatase 2	2.46427	5.51847	0.00850017	0.038866
Naga	ENSMUSG00000022453	N-acetyl galactosaminidase, alpha	2.45899	5.49833	0.00588531	0.031266
Epb41l5	ENSMUSG00000026383	erythrocyte membrane protein band 4.1 like 5	2.45422	5.48016	5.57199e-07	0.000248478
Cblb	ENSMUSG00000022637	Casitas B-lineage lymphoma b	2.45376	5.47841	0.0112779	0.0456094
Pdk3	ENSMUSG00000035232	pyruvate dehydrogenase kinase, isoenzyme 3	2.4523	5.47288	0.00928822	0.0411778
Ppia	ENSMUSG00000071866	peptidylprolyl isomerase A	2.45192	5.47145	7.50023e-05	0.00269181
Mea1	ENSMUSG00000002768	male enhanced antigen 1	2.45148	5.46978	0.00110967	0.0122336
Rpf1	ENSMUSG00000028187	ribosome production factor 1 homolog	2.45093	5.46767	0.00748703	0.0358554
Magt1	ENSMUSG00000031232	magnesium transporter 1	2.44998	5.46407	0.0127565	0.0489205
Stk3	ENSMUSG00000022329	serine/threonine kinase 3	2.44966	5.46289	0.0114815	0.0459563
Insig2	ENSMUSG00000003721	insulin induced gene 2	2.44881	5.45967	0.0107812	0.0445114
Tmem110	ENSMUSG00000006526	transmembrane protein 110	2.44378	5.44064	0.0100374	0.0426533
Fam117a	ENSMUSG00000038893	family with sequence similarity 117, member A	2.44309	5.43805	0.0101413	0.0428545
Cyp4v3	ENSMUSG00000079057	cytochrome P450, family 4, subfamily v, polypeptide 3	2.44179	5.43315	0.0131274	0.0497844
Npepl1	ENSMUSG00000039263	aminopeptidase-like 1	2.44129	5.43125	0.0113944	0.0457814
Ints2	ENSMUSG00000018068	integrator complex subunit 2	2.44079	5.42937	0.011045	0.0450416
Tsn	ENSMUSG00000026374	translin	2.43676	5.41426	0.00750526	0.0359201
Cacybp	ENSMUSG00000014226	calcyclin binding protein	2.43649	5.41324	0.0104015	0.0434433
Plxna4	ENSMUSG00000029765	plexin A4	2.43605	5.41156	0.000177847	0.00423981
Cdkn1a	ENSMUSG00000023067	cyclin-dependent kinase inhibitor 1A (P21)	2.43245	5.39811	0.000160702	0.00404746
Slc35a3	ENSMUSG00000027957	solute carrier family 35 (UDP-N-acetylglucosamine (UDP-GlcNAc) transporter), member 3	2.42875	5.38428	0.0120671	0.047547
Polr2e	ENSMUSG00000004667	polymerase (RNA) II (DNA directed) polypeptide E	2.42793	5.3812	0.00741574	0.0357398
Mlph	ENSMUSG00000026303	melanophilin	2.42291	5.36253	0.00126465	0.0130262
Echs1	ENSMUSG00000025465	enoyl Coenzyme A hydratase, short chain, 1, mitochondrial	2.42248	5.36093	0.00728079	0.0353695
Apoe	ENSMUSG00000002985	apolipoprotein E	2.42176	5.35823	0.00686294	0.0339165
Alg10b	ENSMUSG00000075470	asparagine-linked glycosylation 10B (alpha-1,2-glucosyltransferase)	2.42148	5.35721	0.00715791	0.0349415
Mcm6	ENSMUSG00000026355	minichromosome maintenance complex component 6	2.41878	5.34717	0.00081417	0.010202
Epn3	ENSMUSG00000010080	epsin 3	2.418	5.34428	0.000725328	0.00968083
Ube2e3	ENSMUSG00000027011	ubiquitin-conjugating enzyme E2E 3	2.41693	5.34032	0.00926197	0.0411095
Spr	ENSMUSG00000033735	sepiapterin reductase	2.41658	5.33903	0.0052074	0.0290916
Urod	ENSMUSG00000028684	uroporphyrinogen decarboxylase	2.41537	5.33456	0.00653637	0.0329908
Efnb1	ENSMUSG00000031217	ephrin B1	2.40596	5.29989	0.0123754	0.0483599
Mrps9	ENSMUSG00000060679	mitochondrial ribosomal protein S9	2.40125	5.28259	0.00676045	0.0336513
Myc	ENSMUSG00000022346	myelocytomatosis oncogene	2.39838	5.27212	0.0125742	0.0487959
Mtcl1	ENSMUSG00000052105	microtubule crosslinking factor 1	2.39816	5.27129	6.39997e-05	0.00244508
Selenow	ENSMUSG00000041571	selenoprotein W	2.39813	5.2712	0.00973832	0.0419229
Bpnt1	ENSMUSG00000026617	bisphosphate 3'-nucleotidase 1	2.39598	5.26336	0.00660999	0.0332077
Dhx32	ENSMUSG00000030986	DEAH (Asp-Glu-Ala-His) box polypeptide 32	2.39372	5.25512	0.00175028	0.0162211
Stambp	ENSMUSG00000006906	STAM binding protein	2.39337	5.25385	0.00860456	0.0391309
Zfp942	ENSMUSG00000071267	zinc finger protein 942	2.39055	5.24358	0.00899129	0.040357
Ralgds	ENSMUSG00000026821	ral guanine nucleotide dissociation stimulator	2.3823	5.21367	0.000500967	0.00755036
Dap3	ENSMUSG00000068921	death associated protein 3	2.38074	5.20805	0.0126596	0.0488778
N4bp2	ENSMUSG00000037795	NEDD4 binding protein 2	2.3807	5.20789	0.00891472	0.0400845
Pgm3	ENSMUSG00000056131	phosphoglucomutase 3	2.37909	5.20207	0.0126664	0.0488778
Rrn3	ENSMUSG00000022682	RRN3 RNA polymerase I transcription factor homolog (yeast)	2.37644	5.19253	0.0126756	0.0488778
Rab3gap1	ENSMUSG00000036104	RAB3 GTPase activating protein subunit 1	2.37538	5.18871	0.00824777	0.0382658
Snx7	ENSMUSG00000028007	sorting nexin 7	2.37144	5.17457	0.00371489	0.0243673
Mfsd12	ENSMUSG00000034854	major facilitator superfamily domain containing 12	2.37078	5.17222	0.00400246	0.0252312
Tmem109	ENSMUSG00000034659	transmembrane protein 109	2.3701	5.16977	0.0107368	0.0443813
Hmga1	ENSMUSG00000046711	high mobility group AT-hook 1	2.36702	5.15874	0.00283053	0.0212038
Wdr70	ENSMUSG00000039828	WD repeat domain 70	2.36587	5.15462	0.00693108	0.0341198
Fbxw5	ENSMUSG00000015095	F-box and WD-40 domain protein 5	2.36568	5.15395	0.0124991	0.0486072
Timmdc1	ENSMUSG00000002846	translocase of inner mitochondrial membrane domain containing 1	2.36232	5.14195	0.012761	0.0489205
Lcorl	ENSMUSG00000015882	ligand dependent nuclear receptor corepressor-like	2.36082	5.13661	0.0106708	0.044194
Stap2	ENSMUSG00000038781	signal transducing adaptor family member 2	2.36024	5.13457	0.00962875	0.0417197
Plbd2	ENSMUSG00000029598	phospholipase B domain containing 2	2.35206	5.10553	0.0121772	0.0478059
Cdcp1	ENSMUSG00000035498	CUB domain containing protein 1	2.34523	5.08142	0.000124854	0.00347189
Sh3bgrl2	ENSMUSG00000032261	SH3 domain binding glutamic acid-rich protein like 2	2.34486	5.08011	0.00817123	0.0380738
Mtpap	ENSMUSG00000024234	mitochondrial poly(A) polymerase	2.34099	5.06649	0.0114732	0.0459473
Psmd14	ENSMUSG00000026914	proteasome (prosome, macropain) 26S subunit, non-ATPase, 14	2.33869	5.05843	0.0130158	0.0495281
Prkcsh	ENSMUSG00000003402	protein kinase C substrate 80K-H	2.33341	5.03994	0.0096288	0.0417197
Dpy19l4	ENSMUSG00000045205	dpy-19-like 4 (C. elegans)	2.33329	5.03954	0.00759205	0.0362211
Pdxk	ENSMUSG00000032788	pyridoxal (pyridoxine, vitamin B6) kinase	2.33289	5.03814	0.0120964	0.0476376
Anxa4	ENSMUSG00000029994	annexin A4	2.33138	5.03285	0.000696037	0.00942405
Trio	ENSMUSG00000022263	triple functional domain (PTPRF interacting)	2.3119	4.96537	6.45986e-05	0.00244508
Emc10	ENSMUSG00000008140	ER membrane protein complex subunit 10	2.31107	4.96251	0.0108118	0.0445339
Ick	ENSMUSG00000009828	intestinal cell kinase	2.3038	4.93755	0.000640744	0.00884881
Snx17	ENSMUSG00000029146	sorting nexin 17	2.30077	4.92719	0.0127068	0.0489205
H2-Ab1	ENSMUSG00000073421	histocompatibility 2, class II antigen A, beta 1	2.28513	4.87407	0.00294844	0.0215962
Snx30	ENSMUSG00000028385	sorting nexin family member 30	2.2759	4.843	0.00227258	0.0188701
Shroom3	ENSMUSG00000029381	shroom family member 3	2.27522	4.84072	0.0018649	0.0168954
Atp8b1	ENSMUSG00000039529	ATPase, class I, type 8B, member 1	2.27201	4.82996	0.00039485	0.0065933
Tmem173	ENSMUSG00000024349	transmembrane protein 173	2.266	4.80988	0.0118566	0.0470855
Rtcb	ENSMUSG00000001783	RNA 2',3'-cyclic phosphate and 5'-OH ligase	2.26083	4.79268	0.00610788	0.0318897
Arfgef3	ENSMUSG00000019852	ARFGEF family member 3	2.2582	4.78393	0.0105269	0.0437366
Ktn1	ENSMUSG00000021843	kinectin 1	2.2581	4.78361	0.00172273	0.016088
Ube2i	ENSMUSG00000015120	ubiquitin-conjugating enzyme E2I	2.25517	4.77391	0.00585268	0.0311581
Ros1	ENSMUSG00000019893	Ros1 proto-oncogene	2.2495	4.75518	0.0127369	0.0489205
Plpbp	ENSMUSG00000031485	pyridoxal phosphate binding protein	2.24294	4.73359	0.0101365	0.0428545
Nr2f6	ENSMUSG00000002393	nuclear receptor subfamily 2, group F, member 6	2.24079	4.72655	0.000154651	0.00398099
Ints11	ENSMUSG00000029034	integrator complex subunit 11	2.2334	4.70242	0.0129028	0.0492775
Hnrnpr	ENSMUSG00000066037	heterogeneous nuclear ribonucleoprotein R	2.23099	4.69457	0.00586306	0.0311915
Pcx	ENSMUSG00000024892	pyruvate carboxylase	2.22917	4.68864	0.00565172	0.0304086
Lpp	ENSMUSG00000033306	LIM domain containing preferred translocation partner in lipoma	2.2278	4.6842	9.48429e-05	0.0030984
Myh14	ENSMUSG00000030739	myosin, heavy polypeptide 14	2.22744	4.68301	0.000940385	0.0109509
Smarcc1	ENSMUSG00000032481	SWI/SNF related, matrix associated, actin dependent regulator of chromatin, subfamily c, member 1	2.22733	4.68267	0.00453607	0.0270984
Eif3e	ENSMUSG00000022336	eukaryotic translation initiation factor 3, subunit E	2.21626	4.64688	0.00167299	0.0158631
Piezo1	ENSMUSG00000014444	piezo-type mechanosensitive ion channel component 1	2.21342	4.63772	9.16983e-05	0.00302319
Itga3	ENSMUSG00000001507	integrin alpha 3	2.21111	4.63032	0.00154871	0.0150909
Itga7	ENSMUSG00000025348	integrin alpha 7	2.20954	4.62527	0.0093403	0.0412879
Tjp2	ENSMUSG00000024812	tight junction protein 2	2.20252	4.60281	0.00103833	0.0117662
Gramd4	ENSMUSG00000035900	GRAM domain containing 4	2.19642	4.58342	0.000206774	0.00457321
Ctnna1	ENSMUSG00000037815	catenin (cadherin associated protein), alpha 1	2.19376	4.57497	0.00312415	0.0221158
Nup160	ENSMUSG00000051329	nucleoporin 160	2.19252	4.57104	5.79588e-05	0.00232551
Abl2	ENSMUSG00000026596	v-abl Abelson murine leukemia viral oncogene 2 (arg, Abelson-related gene)	2.16731	4.49185	0.0103329	0.0433743
Rps17	ENSMUSG00000061787	ribosomal protein S17	2.16486	4.48424	0.000258966	0.00518001
Ckmt1	ENSMUSG00000000308	creatine kinase, mitochondrial 1, ubiquitous	2.16324	4.47921	2.64685e-05	0.00154352
Aebp2	ENSMUSG00000030232	AE binding protein 2	2.16044	4.47051	0.000205059	0.00457321
Ahcyl2	ENSMUSG00000029772	S-adenosylhomocysteine hydrolase-like 2	2.16001	4.46918	0.000514441	0.00766204
Hsp90b1	ENSMUSG00000020048	heat shock protein 90, beta (Grp94), member 1	2.15947	4.46752	0.00442927	0.026777
Rpap1	ENSMUSG00000034032	RNA polymerase II associated protein 1	2.15146	4.44277	0.0119534	0.0472959
Il17re	ENSMUSG00000043088	interleukin 17 receptor E	2.14952	4.4368	0.000122359	0.00343558
Patj	ENSMUSG00000061859	PATJ, crumbs cell polarity complex component	2.14539	4.4241	0.000125724	0.00347189
Cgnl1	ENSMUSG00000032232	cingulin-like 1	2.14514	4.42336	0.000183786	0.00428938
Epha2	ENSMUSG00000006445	Eph receptor A2	2.13878	4.40389	0.00277108	0.0209369
Rpl28	ENSMUSG00000030432	ribosomal protein L28	2.13514	4.3928	0.00441066	0.026724
Dis3	ENSMUSG00000033166	DIS3 homolog, exosome endoribonuclease and 3'-5' exoribonuclease	2.13075	4.37944	2.17961e-05	0.00140031
Nat10	ENSMUSG00000027185	N-acetyltransferase 10	2.12941	4.37538	5.82515e-05	0.00232551
Celsr1	ENSMUSG00000016028	cadherin, EGF LAG seven-pass G-type receptor 1	2.1286	4.37293	0.000146468	0.00382887
Aldh7a1	ENSMUSG00000053644	aldehyde dehydrogenase family 7, member A1	2.12392	4.35877	0.00292337	0.0215376
Vars2	ENSMUSG00000038838	valyl-tRNA synthetase 2, mitochondrial	2.12207	4.35318	4.13853e-05	0.00196089
Ldha	ENSMUSG00000063229	lactate dehydrogenase A	2.1182	4.34153	0.0030258	0.0218107
Hvcn1	ENSMUSG00000064267	hydrogen voltage-gated channel 1	2.11405	4.32906	0.00476532	0.0276921
Pigu	ENSMUSG00000038383	phosphatidylinositol glycan anchor biosynthesis, class U	2.11374	4.32812	0.00135736	0.0136655
Bhlhe40	ENSMUSG00000030103	basic helix-loop-helix family, member e40	2.11319	4.32648	0.00209342	0.0179527
Hc	ENSMUSG00000026874	hemolytic complement	2.10921	4.31456	0.00246618	0.0198052
Pygb	ENSMUSG00000033059	brain glycogen phosphorylase	2.10884	4.31346	5.64459e-05	0.00230063
Dsg2	ENSMUSG00000044393	desmoglein 2	2.10806	4.3111	0.00891107	0.0400845
Rpl12	ENSMUSG00000038900	ribosomal protein L12	2.10629	4.30583	4.04757e-05	0.00195587
Cenpb	ENSMUSG00000068267	centromere protein B	2.09593	4.27501	6.47911e-06	0.000797869
Camkk1	ENSMUSG00000020785	calcium/calmodulin-dependent protein kinase kinase 1, alpha	2.08937	4.25561	3.94368e-05	0.00195587
Pdia3	ENSMUSG00000027248	protein disulfide isomerase associated 3	2.08149	4.23244	0.0037679	0.0245821
Slc4a4	ENSMUSG00000060961	solute carrier family 4 (anion exchanger), member 4	2.07883	4.22464	0.000438813	0.0070119
Creld1	ENSMUSG00000030284	cysteine-rich with EGF-like domains 1	2.07777	4.22154	5.51499e-05	0.00228062
Myef2	ENSMUSG00000027201	myelin basic protein expression factor 2, repressor	2.07022	4.1995	0.000298218	0.00547959
Fam83h	ENSMUSG00000046761	family with sequence similarity 83, member H	2.06569	4.18635	0.00442208	0.0267548
Asap2	ENSMUSG00000052632	ArfGAP with SH3 domain, ankyrin repeat and PH domain 2	2.06519	4.1849	0.000375802	0.0064456
Prr12	ENSMUSG00000046574	proline rich 12	2.06513	4.18471	0.00389734	0.0248928
Ext1	ENSMUSG00000061731	exostoses (multiple) 1	2.06463	4.18328	0.0010027	0.0115524
Akt1s1	ENSMUSG00000011096	AKT1 substrate 1 (proline-rich)	2.05832	4.16501	0.000913639	0.0108733
Thoc1	ENSMUSG00000024287	THO complex 1	2.05304	4.14979	0.00177235	0.016306
Pkhd1	ENSMUSG00000043760	polycystic kidney and hepatic disease 1	2.04236	4.11919	0.00100678	0.0115796
C77080	ENSMUSG00000050390	expressed sequence C77080	2.03725	4.10464	0.0042896	0.026289
Plekhd1	ENSMUSG00000066438	pleckstrin homology domain containing, family D (with coiled-coil domains) member 1	2.03166	4.08876	0.00307449	0.021947
Pi4k2b	ENSMUSG00000029186	phosphatidylinositol 4-kinase type 2 beta	2.03129	4.08769	0.000183887	0.00428938
Slc35d1	ENSMUSG00000028521	solute carrier family 35 (UDP-glucuronic acid/UDP-N-acetylgalactosamine dual transporter), member D1	2.01438	4.04007	8.1906e-05	0.00283258
Zfhx2	ENSMUSG00000040721	zinc finger homeobox 2	2.01281	4.03567	0.0110642	0.0450713
Itga6	ENSMUSG00000027111	integrin alpha 6	2.00832	4.02312	0.0112375	0.045519
Ptpn3	ENSMUSG00000038764	protein tyrosine phosphatase, non-receptor type 3	2.00308	4.00854	0.000619291	0.00863023
Trip6	ENSMUSG00000023348	thyroid hormone receptor interactor 6	1.99988	3.99966	0.00509931	0.0287689
Ddx54	ENSMUSG00000029599	DEAD (Asp-Glu-Ala-Asp) box polypeptide 54	1.99183	3.97742	0.00232617	0.0191059
Gmcl1	ENSMUSG00000001157	germ cell-less, spermatogenesis associated 1	1.98957	3.97118	0.00322854	0.0226094
Naxd	ENSMUSG00000031505	NAD(P)HX dehydratase	1.98524	3.95927	0.00078645	0.0101003
Kcnn3	ENSMUSG00000000794	potassium intermediate/small conductance calcium-activated channel, subfamily N, member 3	1.98112	3.94799	0.00804442	0.0376682
Fam129b	ENSMUSG00000026796	family with sequence similarity 129, member B	1.97473	3.93056	0.00548175	0.0299212
Vcan	ENSMUSG00000021614	versican	1.97473	3.93054	0.0110569	0.0450659
Tuft1	ENSMUSG00000005968	tuftelin 1	1.97245	3.92435	0.000819924	0.0102403
Exosc7	ENSMUSG00000025785	exosome component 7	1.96765	3.9113	0.00404408	0.0253793
Atp1a1	ENSMUSG00000033161	ATPase, Na+/K+ transporting, alpha 1 polypeptide	1.96232	3.89689	0.00809356	0.0378282
Exoc4	ENSMUSG00000029763	exocyst complex component 4	1.96219	3.89652	0.000311746	0.0056675
S100a13	ENSMUSG00000042312	S100 calcium binding protein A13	1.95897	3.88785	0.00188527	0.0169741
Bsg	ENSMUSG00000023175	basigin	1.95756	3.88404	0.00196318	0.0173653
Ubfd1	ENSMUSG00000030870	ubiquitin family domain containing 1	1.94444	3.84889	0.00111024	0.0122336
Rab15	ENSMUSG00000021062	RAB15, member RAS oncogene family	1.93947	3.83564	0.000831151	0.0103464
Ddx1	ENSMUSG00000037149	DEAD (Asp-Glu-Ala-Asp) box polypeptide 1	1.93875	3.83373	0.000276569	0.00528733
Klhl22	ENSMUSG00000022750	kelch-like 22	1.93544	3.82495	0.00227174	0.0188701
Primpol	ENSMUSG00000038225	primase and polymerase (DNA-directed)	1.93004	3.81067	0.0118361	0.0470775
Ccdc86	ENSMUSG00000024732	coiled-coil domain containing 86	1.92071	3.78608	0.00536864	0.0295073
Nus1	ENSMUSG00000023068	NUS1 dehydrodolichyl diphosphate synthase subunit	1.91509	3.77138	0.000100542	0.00316926
Wnt7a	ENSMUSG00000030093	wingless-type MMTV integration site family, member 7A	1.91401	3.76856	0.000846707	0.0104403
Myo5b	ENSMUSG00000025885	myosin VB	1.91235	3.76421	9.94596e-05	0.00316808
Arhgef5	ENSMUSG00000033542	Rho guanine nucleotide exchange factor (GEF) 5	1.91077	3.7601	1.2502e-05	0.0010499
Phlda1	ENSMUSG00000020205	pleckstrin homology like domain, family A, member 1	1.90434	3.74338	0.000796622	0.0101329
Padi2	ENSMUSG00000028927	peptidyl arginine deiminase, type II	1.90408	3.7427	0.00801457	0.0375516
Ruvbl1	ENSMUSG00000030079	RuvB-like protein 1	1.90226	3.73798	0.00691062	0.0340855
Tanc1	ENSMUSG00000035168	tetratricopeptide repeat, ankyrin repeat and coiled-coil containing 1	1.90165	3.73639	0.000104349	0.00316926
Dcaf1	ENSMUSG00000040325	DDB1 and CUL4 associated factor 1	1.90024	3.73275	0.000156357	0.00399104
Eif3k	ENSMUSG00000053565	eukaryotic translation initiation factor 3, subunit K	1.89997	3.73206	0.0010965	0.0121503
Usp14	ENSMUSG00000047879	ubiquitin specific peptidase 14	1.88868	3.70296	0.00087953	0.010613
Ptgr2	ENSMUSG00000072946	prostaglandin reductase 2	1.88636	3.697	0.00314872	0.0222349
Psmc5	ENSMUSG00000020708	protease (prosome, macropain) 26S subunit, ATPase 5	1.88493	3.69334	0.00900437	0.0403744
Mta1	ENSMUSG00000021144	metastasis associated 1	1.87891	3.67796	0.00335349	0.0230676
Phf20	ENSMUSG00000038116	PHD finger protein 20	1.8761	3.67082	0.000513827	0.00766204
Crtc1	ENSMUSG00000003575	CREB regulated transcription coactivator 1	1.87456	3.6669	0.00104998	0.0118451
Plekha7	ENSMUSG00000045659	pleckstrin homology domain containing, family A member 7	1.87382	3.66501	0.0112768	0.0456094
Renbp	ENSMUSG00000031387	renin binding protein	1.87204	3.66049	0.000251142	0.0050771
Eif3g	ENSMUSG00000070319	eukaryotic translation initiation factor 3, subunit G	1.86923	3.65337	0.000692723	0.00941134
Wasl	ENSMUSG00000029684	Wiskott-Aldrich syndrome-like (human)	1.86147	3.63378	0.00355767	0.0237001
Trim37	ENSMUSG00000018548	tripartite motif-containing 37	1.86004	3.63019	0.00159166	0.0153126
Cd74	ENSMUSG00000024610	CD74 antigen (invariant polypeptide of major histocompatibility complex, class II antigen-associated)	1.85498	3.61746	0.00866216	0.0392985
Pnpla6	ENSMUSG00000004565	patatin-like phospholipase domain containing 6	1.85326	3.61317	0.000207487	0.00457321
Pls3	ENSMUSG00000016382	plastin 3 (T-isoform)	1.84956	3.60391	0.0119803	0.0473673
Abcf3	ENSMUSG00000003234	ATP-binding cassette, sub-family F (GCN20), member 3	1.84953	3.60383	0.00950925	0.0415742
Nup205	ENSMUSG00000038759	nucleoporin 205	1.8491	3.60275	0.000220899	0.00463233
Plekha6	ENSMUSG00000041757	pleckstrin homology domain containing, family A member 6	1.84795	3.59988	0.00118227	0.0125354
Epg5	ENSMUSG00000039840	ectopic P-granules autophagy protein 5 homolog (C. elegans)	1.84594	3.59486	0.0124196	0.048459
Hook2	ENSMUSG00000052566	hook microtubule tethering protein 2	1.84024	3.58069	0.00166637	0.0158504
Sec23b	ENSMUSG00000027429	SEC23 homolog B, COPII coat complex component	1.83779	3.57463	0.00467229	0.0275563
Pgap2	ENSMUSG00000030990	post-GPI attachment to proteins 2	1.8313	3.55856	0.00546389	0.0298858
Zfp386	ENSMUSG00000042063	zinc finger protein 386 (Kruppel-like)	1.82928	3.5536	0.00254282	0.0200154
Phldb2	ENSMUSG00000033149	pleckstrin homology like domain, family B, member 2	1.82735	3.54885	0.00386499	0.0248834
Slc39a9	ENSMUSG00000048833	solute carrier family 39 (zinc transporter), member 9	1.82705	3.54812	0.00272736	0.0207384
Tarm1	ENSMUSG00000053338	T cell-interacting, activating receptor on myeloid cells 1	1.8245	3.54184	0.00471092	0.027642
Eif2s2	ENSMUSG00000074656	eukaryotic translation initiation factor 2, subunit 2 (beta)	1.82441	3.54161	0.00507681	0.0286791
Hnrnpf	ENSMUSG00000042079	heterogeneous nuclear ribonucleoprotein F	1.82259	3.53717	0.0115845	0.0462467
Ehf	ENSMUSG00000012350	ets homologous factor	1.82256	3.53709	0.00211782	0.0180597
Atp2c2	ENSMUSG00000034112	ATPase, Ca++ transporting, type 2C, member 2	1.81761	3.52498	0.00535728	0.0295073
Mfn1	ENSMUSG00000027668	mitofusin 1	1.81511	3.51886	0.00406388	0.0254054
Garem1	ENSMUSG00000042680	GRB2 associated regulator of MAPK1 subtype 1	1.81337	3.51461	0.0107858	0.0445114
Sgsm2	ENSMUSG00000038351	small G protein signaling modulator 2	1.8114	3.50983	0.00112965	0.0123221
D5Ertd579e	ENSMUSG00000029190	DNA segment, Chr 5, ERATO Doi 579, expressed	1.80997	3.50636	0.00525292	0.0292597
Rpn2	ENSMUSG00000027642	ribophorin II	1.80934	3.50483	0.000544141	0.0078724
Hunk	ENSMUSG00000053414	hormonally upregulated Neu-associated kinase	1.798	3.47739	0.00118502	0.0125402
Snx25	ENSMUSG00000038291	sorting nexin 25	1.79777	3.47683	0.00418949	0.0258426
Camk2d	ENSMUSG00000053819	calcium/calmodulin-dependent protein kinase II, delta	1.79665	3.47411	0.00208378	0.0179106
Ckap2l	ENSMUSG00000048327	cytoskeleton associated protein 2-like	1.78793	3.45319	0.00321494	0.0225671
Ralgapa2	ENSMUSG00000037110	Ral GTPase activating protein, alpha subunit 2 (catalytic)	1.78675	3.45037	0.00469651	0.0276211
Synj2	ENSMUSG00000023805	synaptojanin 2	1.78636	3.44944	0.00169805	0.0159973
Taf10	ENSMUSG00000043866	TATA-box binding protein associated factor 10	1.78145	3.43771	0.000801738	0.0101329
Sugp2	ENSMUSG00000036054	SURP and G patch domain containing 2	1.7761	3.42499	0.00837434	0.038523
Cul7	ENSMUSG00000038545	cullin 7	1.77058	3.41191	0.0005905	0.00828997
Pdap1	ENSMUSG00000029623	PDGFA associated protein 1	1.77047	3.41165	0.004315	0.0263594
Nup214	ENSMUSG00000001855	nucleoporin 214	1.76828	3.40647	0.000752817	0.00993792
Ttll7	ENSMUSG00000036745	tubulin tyrosine ligase-like family, member 7	1.76547	3.39986	0.00347038	0.023467
Tango6	ENSMUSG00000041949	transport and golgi organization 6	1.76191	3.39148	0.0124174	0.048459
Arhgef16	ENSMUSG00000029032	Rho guanine nucleotide exchange factor (GEF) 16	1.76148	3.39045	0.000159805	0.00403826
Vdac1	ENSMUSG00000020402	voltage-dependent anion channel 1	1.75927	3.38526	0.000517832	0.00769657
Sestd1	ENSMUSG00000042272	SEC14 and spectrin domains 1	1.75832	3.38305	0.000136988	0.00363887
Ssbp1	ENSMUSG00000029911	single-stranded DNA binding protein 1	1.75773	3.38166	0.00143318	0.014184
Lgmn	ENSMUSG00000021190	legumain	1.74514	3.35228	0.0066398	0.0332912
Mllt1	ENSMUSG00000024212	myeloid/lymphoid or mixed-lineage leukemia; translocated to, 1	1.7423	3.34569	0.00267452	0.0204868
Aldh9a1	ENSMUSG00000026687	aldehyde dehydrogenase 9, subfamily A1	1.74129	3.34335	0.00158634	0.0152809
Large1	ENSMUSG00000004383	LARGE xylosyl- and glucuronyltransferase 1	1.72983	3.31689	0.00159835	0.0153575
Erbb2	ENSMUSG00000062312	erb-b2 receptor tyrosine kinase 2	1.72433	3.30426	0.00832389	0.0384723
Taf3	ENSMUSG00000025782	TATA-box binding protein associated factor 3	1.72347	3.30229	0.00530732	0.0294059
Nol6	ENSMUSG00000028430	nucleolar protein family 6 (RNA-associated)	1.71751	3.28868	0.000163894	0.00408711
Lmo7	ENSMUSG00000033060	LIM domain only 7	1.7036	3.25713	0.00422966	0.0260268
Nek1	ENSMUSG00000031644	NIMA (never in mitosis gene a)-related expressed kinase 1	1.69656	3.24127	0.0040147	0.0252367
Mgat3	ENSMUSG00000042428	mannoside acetylglucosaminyltransferase 3	1.69108	3.22899	0.00333709	0.0230487
Sav1	ENSMUSG00000021067	salvador family WW domain containing 1	1.69003	3.22664	0.00277281	0.0209369
Plekhb2	ENSMUSG00000026123	pleckstrin homology domain containing, family B (evectins) member 2	1.68975	3.22602	0.00296913	0.0216484
Shank2	ENSMUSG00000037541	SH3 and multiple ankyrin repeat domains 2	1.68919	3.22476	0.00954809	0.0415986
Slc39a10	ENSMUSG00000025986	solute carrier family 39 (zinc transporter), member 10	1.68888	3.22405	0.00118604	0.0125402
Ptprs	ENSMUSG00000013236	protein tyrosine phosphatase, receptor type, S	1.685	3.21541	0.00465921	0.0275518
Car4	ENSMUSG00000000805	carbonic anhydrase 4	1.68122	3.20698	0.0101505	0.0428698
Ctnnd1	ENSMUSG00000034101	catenin (cadherin associated protein), delta 1	1.67742	3.19856	0.00252189	0.0200154
Cltb	ENSMUSG00000047547	clathrin, light polypeptide (Lcb)	1.67652	3.19657	0.0122444	0.0480211
Fam20b	ENSMUSG00000033557	family with sequence similarity 20, member B	1.66949	3.18102	0.00266413	0.0204628
Lima1	ENSMUSG00000023022	LIM domain and actin binding 1	1.66375	3.16839	0.00435309	0.026528
Ptma	ENSMUSG00000026238	prothymosin alpha	1.66373	3.16835	0.000409044	0.0067327
Eif3h	ENSMUSG00000022312	eukaryotic translation initiation factor 3, subunit H	1.65827	3.15637	0.00447533	0.0269927
Macc1	ENSMUSG00000041886	metastasis associated in colon cancer 1	1.65401	3.14707	0.00436265	0.0265307
Carmil1	ENSMUSG00000021338	capping protein regulator and myosin 1 linker 1	1.65263	3.14406	0.000603246	0.00845325
Usp10	ENSMUSG00000031826	ubiquitin specific peptidase 10	1.65129	3.14114	0.000388524	0.00651637
Myof	ENSMUSG00000048612	myoferlin	1.64737	3.13262	0.00910328	0.0407105
Tnfrsf10b	ENSMUSG00000022074	tumor necrosis factor receptor superfamily, member 10b	1.64656	3.13086	0.0029959	0.0217513
Acp5	ENSMUSG00000001348	acid phosphatase 5, tartrate resistant	1.64645	3.13063	0.0035501	0.0236704
Ppfibp1	ENSMUSG00000016487	PTPRF interacting protein, binding protein 1 (liprin beta 1)	1.64452	3.12643	0.000458757	0.00715604
Sytl2	ENSMUSG00000030616	synaptotagmin-like 2	1.64439	3.12616	0.000559749	0.00803685
St13	ENSMUSG00000022403	suppression of tumorigenicity 13	1.63744	3.11113	0.00011883	0.00339944
Med12l	ENSMUSG00000056476	mediator complex subunit 12-like	1.63576	3.1075	0.000989058	0.01143
Epb41l1	ENSMUSG00000027624	erythrocyte membrane protein band 4.1 like 1	1.63485	3.10556	0.000630012	0.00873148
Zdhhc3	ENSMUSG00000025786	zinc finger, DHHC domain containing 3	1.63425	3.10427	0.00593775	0.0313939
Rcbtb2	ENSMUSG00000022106	regulator of chromosome condensation (RCC1) and BTB (POZ) domain containing protein 2	1.6275	3.08977	0.00307956	0.0219625
Ctss	ENSMUSG00000038642	cathepsin S	1.62596	3.08647	0.00798452	0.0374571
Dynll1	ENSMUSG00000009013	dynein light chain LC8-type 1	1.61926	3.07218	0.00134097	0.0135365
Chchd3	ENSMUSG00000053768	coiled-coil-helix-coiled-coil-helix domain containing 3	1.61923	3.07211	0.000229024	0.0047438
Gde1	ENSMUSG00000033917	glycerophosphodiester phosphodiesterase 1	1.61522	3.06359	0.00628826	0.0324736
Clmn	ENSMUSG00000021097	calmin	1.61372	3.0604	0.00618851	0.0321116
Cgn	ENSMUSG00000068876	cingulin	1.61262	3.05807	0.00383486	0.0248055
Xpnpep1	ENSMUSG00000025027	X-prolyl aminopeptidase (aminopeptidase P) 1, soluble	1.61017	3.05287	0.00670337	0.0335213
Ptprk	ENSMUSG00000019889	protein tyrosine phosphatase, receptor type, K	1.60429	3.04046	0.00131736	0.0134053
Pgap1	ENSMUSG00000073678	post-GPI attachment to proteins 1	1.59995	3.03134	0.00345111	0.0233785
AI661453	ENSMUSG00000034382	expressed sequence AI661453	1.59516	3.02128	0.00345388	0.0233785
Pacsin3	ENSMUSG00000027257	protein kinase C and casein kinase substrate in neurons 3	1.59472	3.02036	0.00531031	0.0294059
Tom1l1	ENSMUSG00000020541	target of myb1-like 1 (chicken)	1.59324	3.01725	0.00101866	0.0116595
Eml4	ENSMUSG00000032624	echinoderm microtubule associated protein like 4	1.59275	3.01624	0.000563168	0.00807066
Srebf2	ENSMUSG00000022463	sterol regulatory element binding factor 2	1.59069	3.01194	0.0123283	0.0482639
Rps15	ENSMUSG00000063457	ribosomal protein S15	1.58133	2.99247	0.0132154	0.0499679
Plekha1	ENSMUSG00000040268	pleckstrin homology domain containing, family A (phosphoinositide binding specific) member 1	1.57492	2.97918	0.0126749	0.0488778
Tcp1	ENSMUSG00000068039	t-complex protein 1	1.57463	2.97859	0.000535663	0.00782741
Olr1	ENSMUSG00000030162	oxidized low density lipoprotein (lectin-like) receptor 1	1.57171	2.97256	0.0117399	0.0467685
Junos	ENSMUSG00000087366	jun proto-oncogene, opposite strand	1.57154	2.97222	0.00496227	0.0283275
Zfp704	ENSMUSG00000040209	zinc finger protein 704	1.56596	2.96074	0.00200808	0.0175876
Ssbp3	ENSMUSG00000061887	single-stranded DNA binding protein 3	1.56477	2.95831	0.000842791	0.0104228
Egln3	ENSMUSG00000035105	egl-9 family hypoxia-inducible factor 3	1.56079	2.95016	0.01242	0.048459
Plxnb1	ENSMUSG00000053646	plexin B1	1.56003	2.94861	0.00752256	0.0359802
Comt	ENSMUSG00000000326	catechol-O-methyltransferase	1.55262	2.9335	0.00535671	0.0295073
Yipf6	ENSMUSG00000047694	Yip1 domain family, member 6	1.5507	2.92959	0.00946714	0.0414506
Wwtr1	ENSMUSG00000027803	WW domain containing transcription regulator 1	1.53607	2.90004	0.0102401	0.0432
Evpl	ENSMUSG00000034282	envoplakin	1.53263	2.89312	0.00121703	0.0127561
Cfdp1	ENSMUSG00000031954	craniofacial development protein 1	1.53101	2.88988	0.000709321	0.00956826
Cib1	ENSMUSG00000030538	calcium and integrin binding 1 (calmyrin)	1.52772	2.88329	0.0113019	0.0456228
Prmt7	ENSMUSG00000060098	protein arginine N-methyltransferase 7	1.52644	2.88075	0.00964918	0.0417764
Golgb1	ENSMUSG00000034243	golgi autoantigen, golgin subfamily b, macrogolgin 1	1.5261	2.88006	0.00841217	0.0386267
Rnf168	ENSMUSG00000014074	ring finger protein 168	1.51899	2.86591	0.00143169	0.014184
Knop1	ENSMUSG00000030980	lysine rich nucleolar protein 1	1.51692	2.86178	0.000127277	0.00347189
Ptms	ENSMUSG00000030122	parathymosin	1.51654	2.86103	0.0121585	0.0478059
Nek6	ENSMUSG00000026749	NIMA (never in mitosis gene a)-related expressed kinase 6	1.50526	2.83875	0.00634971	0.0325859
Rapgef5	ENSMUSG00000041992	Rap guanine nucleotide exchange factor (GEF) 5	1.50121	2.8308	0.00240813	0.0195043
Myo6	ENSMUSG00000033577	myosin VI	1.49698	2.82252	0.00103786	0.0117662
Uqcrfs1	ENSMUSG00000038462	ubiquinol-cytochrome c reductase, Rieske iron-sulfur polypeptide 1	1.49625	2.82109	0.00813371	0.0379456
Pdia4	ENSMUSG00000025823	protein disulfide isomerase associated 4	1.4924	2.81358	0.00205015	0.0177156
Naa50	ENSMUSG00000022698	N(alpha)-acetyltransferase 50, NatE catalytic subunit	1.4921	2.81297	4.77323e-05	0.00212858
Mthfd1	ENSMUSG00000021048	methylenetetrahydrofolate dehydrogenase (NADP+ dependent), methenyltetrahydrofolate cyclohydrolase, formyltetrahydrofolate synthase	1.4838	2.79684	0.00939359	0.0413987
Iars	ENSMUSG00000037851	isoleucine-tRNA synthetase	1.48197	2.79329	0.0016305	0.0155874
Cyb5r3	ENSMUSG00000018042	cytochrome b5 reductase 3	1.47828	2.78616	0.000753545	0.00993792
Mbtps1	ENSMUSG00000031835	membrane-bound transcription factor peptidase, site 1	1.47769	2.78502	0.00564274	0.0304086
Atp5a1	ENSMUSG00000025428	ATP synthase, H+ transporting, mitochondrial F1 complex, alpha subunit 1	1.47233	2.7747	0.00546861	0.0298901
Kif21a	ENSMUSG00000022629	kinesin family member 21A	1.47042	2.77103	0.00884744	0.0398766
Galnt3	ENSMUSG00000026994	polypeptide N-acetylgalactosaminyltransferase 3	1.46986	2.76996	0.00254521	0.0200154
Lsg1	ENSMUSG00000022538	large 60S subunit nuclear export GTPase 1	1.4692	2.76869	0.000952424	0.0110572
Lonp1	ENSMUSG00000041168	lon peptidase 1, mitochondrial	1.46849	2.76732	0.00603062	0.0316827
Ano8	ENSMUSG00000034863	anoctamin 8	1.46319	2.75717	0.004065	0.0254054
Ncor2	ENSMUSG00000029478	nuclear receptor co-repressor 2	1.45942	2.74998	0.00500541	0.0284453
Ptgfrn	ENSMUSG00000027864	prostaglandin F2 receptor negative regulator	1.4549	2.74138	0.00379083	0.0246469
Ddr1	ENSMUSG00000003534	discoidin domain receptor family, member 1	1.45346	2.73865	0.00334435	0.0230487
Celf1	ENSMUSG00000005506	CUGBP, Elav-like family member 1	1.45268	2.73715	0.00292906	0.0215584
Dapk1	ENSMUSG00000021559	death associated protein kinase 1	1.45161	2.73514	0.00302609	0.0218107
B4galt6	ENSMUSG00000056124	UDP-Gal:betaGlcNAc beta 1,4-galactosyltransferase, polypeptide 6	1.44665	2.72574	0.00613654	0.0319294
Eif3c	ENSMUSG00000030738	eukaryotic translation initiation factor 3, subunit C	1.4464	2.72528	0.00492815	0.0282217
Adk	ENSMUSG00000039197	adenosine kinase	1.44483	2.72231	0.00172892	0.0161217
Shtn1	ENSMUSG00000041362	shootin 1	1.44316	2.71916	0.00851292	0.0389008
Lrp5	ENSMUSG00000024913	low density lipoprotein receptor-related protein 5	1.44057	2.71427	0.00819225	0.0381401
Havcr2	ENSMUSG00000020399	hepatitis A virus cellular receptor 2	1.43048	2.69536	0.00305744	0.0219092
Arfip2	ENSMUSG00000030881	ADP-ribosylation factor interacting protein 2	1.42812	2.69095	0.00417304	0.0257621
Gtf2i	ENSMUSG00000060261	general transcription factor II I	1.42635	2.68765	0.011317	0.0456281
Brd7	ENSMUSG00000031660	bromodomain containing 7	1.42437	2.68398	0.00652807	0.0329709
Rps26	ENSMUSG00000025362	ribosomal protein S26	1.42151	2.67866	8.22014e-05	0.00283258
Psmd11	ENSMUSG00000017428	proteasome (prosome, macropain) 26S subunit, non-ATPase, 11	1.41327	2.66341	0.00947079	0.0414506
Akap1	ENSMUSG00000018428	A kinase (PRKA) anchor protein 1	1.41292	2.66276	0.0038772	0.0248834
Pofut1	ENSMUSG00000046020	protein O-fucosyltransferase 1	1.4079	2.65352	0.000575673	0.00818795
Tecpr1	ENSMUSG00000066621	tectonin beta-propeller repeat containing 1	1.4005	2.63994	0.00747812	0.0358354
Wwc1	ENSMUSG00000018849	WW, C2 and coiled-coil domain containing 1	1.39701	2.63355	0.0121045	0.0476449
Vars	ENSMUSG00000007029	valyl-tRNA synthetase	1.39515	2.63016	0.0103681	0.0434259
Babam1	ENSMUSG00000031820	BRISC and BRCA1 A complex member 1	1.39492	2.62974	0.000992102	0.0114477
Ccdc25	ENSMUSG00000022035	coiled-coil domain containing 25	1.39468	2.62931	0.00315001	0.0222349
Trim44	ENSMUSG00000027189	tripartite motif-containing 44	1.38807	2.61728	0.00491421	0.0282217
Rsl1d1	ENSMUSG00000005846	ribosomal L1 domain containing 1	1.38766	2.61653	0.00773581	0.0366278
Wls	ENSMUSG00000028173	wntless WNT ligand secretion mediator	1.38732	2.61592	0.00608932	0.0318367
Rpl5	ENSMUSG00000058558	ribosomal protein L5	1.38705	2.61543	0.00683625	0.0338951
Msh2	ENSMUSG00000024151	mutS homolog 2	1.38446	2.61074	0.00488073	0.0281161
Dock7	ENSMUSG00000028556	dedicator of cytokinesis 7	1.38096	2.60441	0.000215365	0.0045869
Gart	ENSMUSG00000022962	phosphoribosylglycinamide formyltransferase	1.3807	2.60395	0.000500808	0.00755036
Ppl	ENSMUSG00000039457	periplakin	1.38057	2.60372	0.00504374	0.0285478
Pld2	ENSMUSG00000020828	phospholipase D2	1.37954	2.60186	0.00474173	0.0276459
Abca13	ENSMUSG00000004668	ATP-binding cassette, sub-family A (ABC1), member 13	1.37954	2.60186	0.00156955	0.015185
Crat	ENSMUSG00000026853	carnitine acetyltransferase	1.37658	2.59653	0.00503865	0.0285478
Zfp687	ENSMUSG00000019338	zinc finger protein 687	1.37623	2.59589	0.000769403	0.00998774
Mccc1	ENSMUSG00000027709	methylcrotonoyl-Coenzyme A carboxylase 1 (alpha)	1.36788	2.58091	0.0131174	0.0497794
Hspa9	ENSMUSG00000024359	heat shock protein 9	1.36373	2.5735	0.0109896	0.0449365
Eif5a	ENSMUSG00000078812	eukaryotic translation initiation factor 5A	1.3629	2.57201	0.00300863	0.0217694
Bcl2l1	ENSMUSG00000007659	BCL2-like 1	1.35867	2.56448	0.000805195	0.0101329
Ubap2	ENSMUSG00000028433	ubiquitin-associated protein 2	1.35711	2.56172	0.00467712	0.0275563
Thap12	ENSMUSG00000030753	THAP domain containing 12	1.35704	2.56159	0.00201214	0.0175876
Hivep2	ENSMUSG00000015501	human immunodeficiency virus type I enhancer binding protein 2	1.35085	2.55063	0.00112277	0.0122824
Snx29	ENSMUSG00000071669	sorting nexin 29	1.34971	2.54861	0.01275	0.0489205
Cops6	ENSMUSG00000019494	COP9 signalosome subunit 6	1.34608	2.5422	0.00229888	0.0189845
Pnn	ENSMUSG00000020994	pinin	1.34532	2.54086	0.00343323	0.023322
Sqle	ENSMUSG00000022351	squalene epoxidase	1.34015	2.53178	0.012654	0.0488778
Chmp2b	ENSMUSG00000004843	charged multivesicular body protein 2B	1.33212	2.51773	0.000443784	0.00704477
Eml3	ENSMUSG00000071647	echinoderm microtubule associated protein like 3	1.3314	2.51646	0.00918192	0.0408498
Ier3	ENSMUSG00000003541	immediate early response 3	1.33066	2.51517	0.00491534	0.0282217
Gtpbp4	ENSMUSG00000021149	GTP binding protein 4	1.33038	2.51469	0.000477062	0.00732467
Rplp1	ENSMUSG00000007892	ribosomal protein, large, P1	1.32859	2.51157	0.00382769	0.0247854
Mkl2	ENSMUSG00000009569	MKL/myocardin-like 2	1.32735	2.50941	0.000287367	0.00533953
Enpp5	ENSMUSG00000023960	ectonucleotide pyrophosphatase/phosphodiesterase 5	1.32283	2.50156	0.0046345	0.0274271
Nfs1	ENSMUSG00000027618	nitrogen fixation gene 1 (S. cerevisiae)	1.31982	2.49635	0.0052068	0.0290916
Dnajc1	ENSMUSG00000026740	DnaJ heat shock protein family (Hsp40) member C1	1.31914	2.49517	0.00119818	0.0126158
Sfxn3	ENSMUSG00000025212	sideroflexin 3	1.31639	2.49042	0.00837332	0.038523
Arid5b	ENSMUSG00000019947	AT rich interactive domain 5B (MRF1-like)	1.31167	2.48229	0.00701825	0.0344818
Ptpn21	ENSMUSG00000021009	protein tyrosine phosphatase, non-receptor type 21	1.30992	2.47928	0.00819551	0.0381401
Set	ENSMUSG00000054766	SET nuclear oncogene	1.308	2.47598	0.00188045	0.0169509
Usp24	ENSMUSG00000028514	ubiquitin specific peptidase 24	1.30658	2.47355	0.000760711	0.00995863
Tnk2	ENSMUSG00000022791	tyrosine kinase, non-receptor, 2	1.30623	2.47295	0.00828447	0.038341
Spns1	ENSMUSG00000030741	spinster homolog 1	1.30198	2.46567	0.00151247	0.014814
Abcc5	ENSMUSG00000022822	ATP-binding cassette, sub-family C (CFTR/MRP), member 5	1.29724	2.45759	0.00360622	0.0238975
Prpf40b	ENSMUSG00000023007	pre-mRNA processing factor 40B	1.29533	2.45434	0.011984	0.0473673
Tacc2	ENSMUSG00000030852	transforming, acidic coiled-coil containing protein 2	1.2952	2.45411	0.00406133	0.0254054
Prmt5	ENSMUSG00000023110	protein arginine N-methyltransferase 5	1.29461	2.45311	0.0103641	0.0434259
Zc3h18	ENSMUSG00000017478	zinc finger CCCH-type containing 18	1.29392	2.45194	0.0128392	0.0491587
Rangap1	ENSMUSG00000022391	RAN GTPase activating protein 1	1.29273	2.44991	0.00259902	0.0202707
Ssr1	ENSMUSG00000021427	signal sequence receptor, alpha	1.2894	2.44427	0.00876092	0.039628
Urb2	ENSMUSG00000031976	URB2 ribosome biogenesis 2 homolog (S. cerevisiae)	1.28851	2.44276	0.00214114	0.0181566
Arhgap10	ENSMUSG00000037148	Rho GTPase activating protein 10	1.28144	2.43081	0.00674381	0.0336126
Hdac3	ENSMUSG00000024454	histone deacetylase 3	1.28047	2.42918	0.00409835	0.0255297
Ipo5	ENSMUSG00000030662	importin 5	1.27959	2.4277	0.00630327	0.0324798
Calu	ENSMUSG00000029767	calumenin	1.27335	2.41722	0.0112907	0.0456094
Atp6v0a1	ENSMUSG00000019302	ATPase, H+ transporting, lysosomal V0 subunit A1	1.27328	2.4171	0.00164835	0.0156987
Tars	ENSMUSG00000022241	threonyl-tRNA synthetase	1.27169	2.41444	0.00240204	0.0194758
Ddx23	ENSMUSG00000003360	DEAD (Asp-Glu-Ala-Asp) box polypeptide 23	1.27038	2.41225	0.0101097	0.0428004
Ppp1r13b	ENSMUSG00000021285	protein phosphatase 1, regulatory subunit 13B	1.2693	2.41045	0.00189384	0.0170082
Rps23	ENSMUSG00000049517	ribosomal protein S23	1.26628	2.4054	0.000540198	0.0078453
Usp6nl	ENSMUSG00000039046	USP6 N-terminal like	1.26351	2.40079	0.00176784	0.0162843
Inppl1	ENSMUSG00000032737	inositol polyphosphate phosphatase-like 1	1.2624	2.39895	0.000786089	0.0101003
Specc1	ENSMUSG00000042331	sperm antigen with calponin homology and coiled-coil domains 1	1.26189	2.3981	0.00942823	0.0414506
Psmd2	ENSMUSG00000006998	proteasome (prosome, macropain) 26S subunit, non-ATPase, 2	1.25925	2.39371	0.00499551	0.0284103
Tmem63b	ENSMUSG00000036026	transmembrane protein 63b	1.25735	2.39056	0.00401387	0.0252367
Ptbp2	ENSMUSG00000028134	polypyrimidine tract binding protein 2	1.25708	2.39012	0.001909	0.0170662
Ptpn13	ENSMUSG00000034573	protein tyrosine phosphatase, non-receptor type 13	1.2558	2.38799	0.00377823	0.0246072
Sf3a1	ENSMUSG00000002129	splicing factor 3a, subunit 1	1.25526	2.3871	0.0111863	0.0454276
Msantd4	ENSMUSG00000041124	Myb/SANT-like DNA-binding domain containing 4 with coiled-coils	1.25472	2.3862	0.00961986	0.0417197
Zbtb20	ENSMUSG00000022708	zinc finger and BTB domain containing 20	1.25275	2.38295	0.0102604	0.0432374
Misp	ENSMUSG00000035852	mitotic spindle positioning	1.25243	2.38242	0.00517066	0.0289591
Vegfa	ENSMUSG00000023951	vascular endothelial growth factor A	1.25114	2.3803	0.00298336	0.0216844
Clec5a	ENSMUSG00000029915	C-type lectin domain family 5, member a	1.24734	2.37403	0.0031076	0.0220645
Fyco1	ENSMUSG00000025241	FYVE and coiled-coil domain containing 1	1.24263	2.3663	0.00712358	0.0348187
Ola1	ENSMUSG00000027108	Obg-like ATPase 1	1.23911	2.36052	0.0122835	0.0481495
Tcf7l2	ENSMUSG00000024985	transcription factor 7 like 2, T cell specific, HMG box	1.23876	2.35995	0.00914651	0.0407787
Sec31a	ENSMUSG00000035325	Sec31 homolog A (S. cerevisiae)	1.23574	2.35503	0.0124713	0.0486072
Rpn1	ENSMUSG00000030062	ribophorin I	1.22827	2.34286	0.00430496	0.0263405
Spag7	ENSMUSG00000018287	sperm associated antigen 7	1.21994	2.32937	0.00648109	0.0328351
Btbd3	ENSMUSG00000062098	BTB (POZ) domain containing 3	1.21676	2.32425	0.000495544	0.00751344
Ercc6	ENSMUSG00000054051	excision repair cross-complementing rodent repair deficiency, complementation group 6	1.2109	2.31482	0.00842997	0.038685
Cul4a	ENSMUSG00000031446	cullin 4A	1.20557	2.30628	0.00706966	0.0346222
Lrpprc	ENSMUSG00000024120	leucine-rich PPR-motif containing	1.19046	2.28226	0.0108775	0.0446502
Pdk1	ENSMUSG00000006494	pyruvate dehydrogenase kinase, isoenzyme 1	1.1904	2.28216	0.00580914	0.0309916
Snd1	ENSMUSG00000001424	staphylococcal nuclease and tudor domain containing 1	1.18928	2.28039	0.00605077	0.031765
Dgcr8	ENSMUSG00000022718	DGCR8, microprocessor complex subunit	1.18735	2.27734	0.00431338	0.0263594
Tnks1bp1	ENSMUSG00000033955	tankyrase 1 binding protein 1	1.17665	2.26051	0.00292338	0.0215376
Esd	ENSMUSG00000021996	esterase D/formylglutathione hydrolase	1.17305	2.25488	0.00528501	0.0293521
Wdr43	ENSMUSG00000041057	WD repeat domain 43	1.17131	2.25216	0.00220384	0.0185431
Eps8	ENSMUSG00000015766	epidermal growth factor receptor pathway substrate 8	1.16916	2.24881	0.013168	0.0498147
Pmm2	ENSMUSG00000022711	phosphomannomutase 2	1.166	2.24388	0.00333036	0.023036
Limk2	ENSMUSG00000020451	LIM motif-containing protein kinase 2	1.16592	2.24376	0.0113617	0.0457182
Frmd4b	ENSMUSG00000030064	FERM domain containing 4B	1.16482	2.24205	0.00688037	0.0339805
Zwint	ENSMUSG00000019923	ZW10 interactor	1.16409	2.24092	0.00305258	0.0219092
Npdc1	ENSMUSG00000015094	neural proliferation, differentiation and control 1	1.16404	2.24085	0.0121705	0.0478059
Vapb	ENSMUSG00000054455	vesicle-associated membrane protein, associated protein B and C	1.1616	2.23706	0.00388816	0.0248928
Rpl22	ENSMUSG00000028936	ribosomal protein L22	1.15343	2.22442	0.0011416	0.0123358
Skiv2l2	ENSMUSG00000016018	superkiller viralicidic activity 2-like 2 (S. cerevisiae)	1.15288	2.22358	0.00284168	0.0212244
Srp68	ENSMUSG00000020780	signal recognition particle 68	1.1398	2.20351	0.000763219	0.00995863
Afg3l2	ENSMUSG00000024527	AFG3-like AAA ATPase 2	1.13861	2.20168	0.00210517	0.0180128
Lztr1	ENSMUSG00000022761	leucine-zipper-like transcriptional regulator, 1	1.13534	2.19671	0.0108851	0.0446502
Yes1	ENSMUSG00000014932	YES proto-oncogene 1, Src family tyrosine kinase	1.12972	2.18816	0.00654596	0.0329953
Rnaseh2a	ENSMUSG00000052926	ribonuclease H2, large subunit	1.12956	2.18792	0.00844641	0.0387136
Arhgef28	ENSMUSG00000021662	Rho guanine nucleotide exchange factor (GEF) 28	1.12681	2.18376	0.0020402	0.0176763
Eif6	ENSMUSG00000027613	eukaryotic translation initiation factor 6	1.12575	2.18216	0.0115744	0.0462307
Ehmt2	ENSMUSG00000013787	euchromatic histone lysine N-methyltransferase 2	1.12289	2.17783	0.00782407	0.0369329
Rbm25	ENSMUSG00000010608	RNA binding motif protein 25	1.10844	2.15613	0.00970892	0.0418915
Aqr	ENSMUSG00000040383	aquarius	1.10459	2.15037	0.00124547	0.0129164
Sf3b3	ENSMUSG00000033732	splicing factor 3b, subunit 3	1.09579	2.1373	0.00467813	0.0275563
Ppip5k2	ENSMUSG00000040648	diphosphoinositol pentakisphosphate kinase 2	1.09222	2.13202	0.00187194	0.0168954
Rabl6	ENSMUSG00000015087	RAB, member RAS oncogene family-like 6	1.09209	2.13182	0.00972936	0.0419229
Ddx21	ENSMUSG00000020075	DEAD (Asp-Glu-Ala-Asp) box polypeptide 21	1.07637	2.10873	0.00569835	0.0305511
Exoc6b	ENSMUSG00000033769	exocyst complex component 6B	1.06335	2.08977	0.00341645	0.0232705
Rad23a	ENSMUSG00000003813	RAD23 homolog A, nucleotide excision repair protein	1.05935	2.08399	0.00594253	0.0313939
Ncaph2	ENSMUSG00000008690	non-SMC condensin II complex, subunit H2	1.05677	2.08026	0.00537529	0.0295077
Naca	ENSMUSG00000061315	nascent polypeptide-associated complex alpha polypeptide	1.05454	2.07706	0.00149495	0.0146803
Dhx37	ENSMUSG00000029480	DEAH (Asp-Glu-Ala-His) box polypeptide 37	1.03121	2.04373	0.00841198	0.0386267
Hdgfl2	ENSMUSG00000002833	HDGF like 2	1.02891	2.04049	0.00721869	0.0351283
Hnrnpd	ENSMUSG00000000568	heterogeneous nuclear ribonucleoprotein D	1.02472	2.03456	0.00592766	0.0313861
Farsa	ENSMUSG00000003808	phenylalanyl-tRNA synthetase, alpha subunit	1.01233	2.01717	0.011532	0.0460887
Txlna	ENSMUSG00000053841	taxilin alpha	1.00732	2.01017	0.0130809	0.0497073
Eftud2	ENSMUSG00000020929	elongation factor Tu GTP binding domain containing 2	1.00377	2.00524	0.00357534	0.0237969
Rnf4	ENSMUSG00000029110	ring finger protein 4	1.00258	2.00358	0.00310072	0.0220645
Pes1	ENSMUSG00000020430	pescadillo ribosomal biogenesis factor 1	1.00231	2.0032	0.0116415	0.0464008
Hip1	ENSMUSG00000039959	huntingtin interacting protein 1	-1.00966	-2.01344	0.011224	0.045519
Agap1	ENSMUSG00000055013	ArfGAP with GTPase domain, ankyrin repeat and PH domain 1	-1.01083	-2.01506	0.00354564	0.0236616
Atp11c	ENSMUSG00000062949	ATPase, class VI, type 11C	-1.012	-2.0167	0.00564843	0.0304086
Stim1	ENSMUSG00000030987	stromal interaction molecule 1	-1.01298	-2.01808	0.0066661	0.0333985
Nsd3	ENSMUSG00000054823	nuclear receptor binding SET domain protein 3	-1.0216	-2.03016	0.00481914	0.0279311
Ypel5	ENSMUSG00000039770	yippee like 5	-1.02916	-2.04084	0.00563738	0.0304086
Myo1g	ENSMUSG00000020437	myosin IG	-1.03188	-2.04468	0.00275019	0.0208772
Syf2	ENSMUSG00000028821	SYF2 homolog, RNA splicing factor (S. cerevisiae)	-1.03231	-2.0453	0.00975886	0.0419875
Max	ENSMUSG00000059436	Max protein	-1.03693	-2.05186	0.00352768	0.0236206
Flcn	ENSMUSG00000032633	folliculin	-1.04	-2.05623	0.00364799	0.0240901
Cdc42	ENSMUSG00000006699	cell division cycle 42	-1.04093	-2.05755	0.00277682	0.0209397
Cap1	ENSMUSG00000028656	CAP, adenylate cyclase-associated protein 1 (yeast)	-1.04396	-2.06187	0.00874141	0.0396106
Lamp2	ENSMUSG00000016534	lysosomal-associated membrane protein 2	-1.04435	-2.06243	0.00231175	0.019008
Zbtb11	ENSMUSG00000022601	zinc finger and BTB domain containing 11	-1.04594	-2.06471	0.0110313	0.04501
Scaper	ENSMUSG00000034007	S phase cyclin A-associated protein in the ER	-1.04713	-2.06641	0.00390353	0.0249096
Washc2	ENSMUSG00000024104	WASH complex subunit 2`	-1.04742	-2.06684	0.00531931	0.0294059
Podxl	ENSMUSG00000025608	podocalyxin-like	-1.04795	-2.06759	0.0113238	0.0456281
Tbc1d1	ENSMUSG00000029174	TBC1 domain family, member 1	-1.05112	-2.07213	0.0063879	0.0326325
Apobr	ENSMUSG00000042759	apolipoprotein B receptor	-1.05113	-2.07216	0.00731418	0.0354233
Per2	ENSMUSG00000055866	period circadian clock 2	-1.05166	-2.07291	0.00779916	0.0368612
Pnpla7	ENSMUSG00000036833	patatin-like phospholipase domain containing 7	-1.0537	-2.07585	0.0074721	0.0358354
Mnt	ENSMUSG00000000282	max binding protein	-1.05411	-2.07644	0.00527949	0.0293441
Ankrd12	ENSMUSG00000034647	ankyrin repeat domain 12	-1.05559	-2.07856	0.0113951	0.0457814
Mier3	ENSMUSG00000032727	MIER family member 3	-1.05633	-2.07964	0.00128713	0.0131683
Tacc1	ENSMUSG00000065954	transforming, acidic coiled-coil containing protein 1	-1.059	-2.08349	0.00200968	0.0175876
Atp6ap1	ENSMUSG00000019087	ATPase, H+ transporting, lysosomal accessory protein 1	-1.05918	-2.08375	0.00157412	0.0152018
Asxl1	ENSMUSG00000042548	additional sex combs like 1	-1.07643	-2.10882	0.00632483	0.0325227
Ric8a	ENSMUSG00000025485	RIC8 guanine nucleotide exchange factor A	-1.08245	-2.11762	0.00142467	0.014184
Chm	ENSMUSG00000025531	choroidermia (RAB escort protein 1)	-1.08295	-2.11836	0.0105098	0.0437054
Tor1aip1	ENSMUSG00000026466	torsin A interacting protein 1	-1.09223	-2.13204	0.00201373	0.0175876
Ssu72	ENSMUSG00000029038	Ssu72 RNA polymerase II CTD phosphatase homolog (yeast)	-1.09391	-2.13452	0.00763609	0.0363626
Btbd10	ENSMUSG00000038187	BTB (POZ) domain containing 10	-1.10143	-2.14568	0.00855816	0.0390048
Ubtf	ENSMUSG00000020923	upstream binding transcription factor, RNA polymerase I	-1.10182	-2.14626	0.00451226	0.0270432
Bcl10	ENSMUSG00000028191	B cell leukemia/lymphoma 10	-1.10635	-2.15301	0.0128888	0.0492739
Megf9	ENSMUSG00000039270	multiple EGF-like-domains 9	-1.10836	-2.156	0.00979138	0.0419909
Zswim4	ENSMUSG00000035671	zinc finger SWIM-type containing 4	-1.11006	-2.15855	0.00456476	0.0272056
Phf21a	ENSMUSG00000058318	PHD finger protein 21A	-1.11253	-2.16225	0.00255377	0.0200416
Creg1	ENSMUSG00000040713	cellular repressor of E1A-stimulated genes 1	-1.11366	-2.16394	0.00387972	0.0248834
Smchd1	ENSMUSG00000024054	SMC hinge domain containing 1	-1.11512	-2.16612	0.00108197	0.0120801
Atp6v1b2	ENSMUSG00000006273	ATPase, H+ transporting, lysosomal V1 subunit B2	-1.11768	-2.16998	0.00108682	0.0121027
Cybc1	ENSMUSG00000039294	cytochrome b 245 chaperone 1	-1.12283	-2.17774	0.00218407	0.0184176
Ctsa	ENSMUSG00000017760	cathepsin A	-1.12295	-2.17792	0.00238554	0.019386
Rab8b	ENSMUSG00000036943	RAB8B, member RAS oncogene family	-1.13351	-2.19391	0.00536337	0.0295073
Inpp4a	ENSMUSG00000026113	inositol polyphosphate-4-phosphatase, type I	-1.13399	-2.19465	0.00622019	0.0322099
Trafd1	ENSMUSG00000042726	TRAF type zinc finger domain containing 1	-1.1432	-2.2087	0.000212176	0.00457321
Zfp36	ENSMUSG00000044786	zinc finger protein 36	-1.14351	-2.20917	0.00882492	0.0397988
Jak1	ENSMUSG00000028530	Janus kinase 1	-1.14858	-2.21696	0.0113273	0.0456281
Smim3	ENSMUSG00000038059	small integral membrane protein 3	-1.14878	-2.21727	0.00463089	0.0274271
Elf4	ENSMUSG00000031103	E74-like factor 4 (ets domain transcription factor)	-1.14886	-2.21739	0.00946901	0.0414506
B2m	ENSMUSG00000060802	beta-2 microglobulin	-1.1493	-2.21806	0.00605908	0.0317662
Itpr2	ENSMUSG00000030287	inositol 1,4,5-triphosphate receptor 2	-1.15342	-2.22441	0.0060831	0.0318367
Irf9	ENSMUSG00000002325	interferon regulatory factor 9	-1.15435	-2.22584	0.00338113	0.0230721
Wbp1l	ENSMUSG00000047731	WW domain binding protein 1 like	-1.15594	-2.2283	0.00875935	0.039628
Synj1	ENSMUSG00000022973	synaptojanin 1	-1.15693	-2.22982	0.00643843	0.0327582
Clasrp	ENSMUSG00000061028	CLK4-associating serine/arginine rich protein	-1.16031	-2.23506	0.00360123	0.0238853
Zranb1	ENSMUSG00000030967	zinc finger, RAN-binding domain containing 1	-1.16651	-2.24468	0.00399111	0.0252312
Cyth4	ENSMUSG00000018008	cytohesin 4	-1.16897	-2.24851	0.00728292	0.0353695
Kat6a	ENSMUSG00000031540	K(lysine) acetyltransferase 6A	-1.17026	-2.25052	0.00108719	0.0121027
Arid3a	ENSMUSG00000019564	AT rich interactive domain 3A (BRIGHT-like)	-1.17592	-2.25938	0.00212676	0.0180597
Sla	ENSMUSG00000022372	src-like adaptor	-1.17888	-2.264	0.00212467	0.0180597
Tmsb4x	ENSMUSG00000049775	thymosin, beta 4, X chromosome	-1.17954	-2.26505	0.0055795	0.0302746
Limd2	ENSMUSG00000040699	LIM domain containing 2	-1.17958	-2.26511	0.00389445	0.0248928
Rgs2	ENSMUSG00000026360	regulator of G-protein signaling 2	-1.1815	-2.26813	0.011863	0.0470855
Slc12a6	ENSMUSG00000027130	solute carrier family 12, member 6	-1.18671	-2.27634	0.00451612	0.0270432
Hbp1	ENSMUSG00000002996	high mobility group box transcription factor 1	-1.19017	-2.2818	0.00782138	0.0369329
Zmym5	ENSMUSG00000040123	zinc finger, MYM-type 5	-1.1941	-2.28802	0.0033684	0.0230676
Cd300a	ENSMUSG00000034652	CD300A molecule	-1.19559	-2.29039	0.00991694	0.0423551
Txn1	ENSMUSG00000028367	thioredoxin 1	-1.19724	-2.293	0.0037564	0.0245283
Wbp2	ENSMUSG00000034341	WW domain binding protein 2	-1.19827	-2.29464	0.0113471	0.0456837
Il1rap	ENSMUSG00000022514	interleukin 1 receptor accessory protein	-1.20076	-2.29861	0.00266816	0.020473
Nin	ENSMUSG00000021068	ninein	-1.20474	-2.30497	0.00209203	0.0179527
Tirap	ENSMUSG00000032041	toll-interleukin 1 receptor (TIR) domain-containing adaptor protein	-1.20599	-2.30696	0.00498534	0.0283738
Fam32a	ENSMUSG00000003039	family with sequence similarity 32, member A	-1.207	-2.30858	0.0078611	0.0370385
Zbtb39	ENSMUSG00000044617	zinc finger and BTB domain containing 39	-1.20768	-2.30965	0.00323001	0.0226094
Trpv2	ENSMUSG00000018507	transient receptor potential cation channel, subfamily V, member 2	-1.20875	-2.31137	0.0037048	0.0243536
Pnrc2	ENSMUSG00000028675	proline-rich nuclear receptor coactivator 2	-1.21038	-2.31398	0.00107614	0.0120328
Hmgcl	ENSMUSG00000028672	3-hydroxy-3-methylglutaryl-Coenzyme A lyase	-1.21311	-2.31836	0.000804589	0.0101329
Apbb1ip	ENSMUSG00000026786	amyloid beta (A4) precursor protein-binding, family B, member 1 interacting protein	-1.21421	-2.32014	0.00885933	0.0399065
Ngly1	ENSMUSG00000021785	N-glycanase 1	-1.2156	-2.32237	0.00173228	0.0161332
Wdfy4	ENSMUSG00000051506	WD repeat and FYVE domain containing 4	-1.21774	-2.32583	0.00086889	0.0105598
Vsir	ENSMUSG00000020101	V-set immunoregulatory receptor	-1.22099	-2.33106	0.0129885	0.0495031
Rassf2	ENSMUSG00000027339	Ras association (RalGDS/AF-6) domain family member 2	-1.22118	-2.33137	0.00128971	0.0131769
Nr3c1	ENSMUSG00000024431	nuclear receptor subfamily 3, group C, member 1	-1.2215	-2.33189	0.0062995	0.0324798
Orai2	ENSMUSG00000039747	ORAI calcium release-activated calcium modulator 2	-1.222	-2.3327	0.0077401	0.0366278
Stk4	ENSMUSG00000018209	serine/threonine kinase 4	-1.22528	-2.33802	0.00143261	0.014184
Wrn	ENSMUSG00000031583	Werner syndrome RecQ like helicase	-1.2259	-2.33901	0.0108768	0.0446502
Cpne3	ENSMUSG00000028228	copine III	-1.22803	-2.34247	0.0130206	0.0495281
Neurl3	ENSMUSG00000047180	neuralized E3 ubiquitin protein ligase 3	-1.23235	-2.34949	0.00808245	0.0377995
Trim39	ENSMUSG00000045409	tripartite motif-containing 39	-1.23443	-2.35288	0.00275742	0.020904
Hist1h2bc	ENSMUSG00000018102	histone cluster 1, H2bc	-1.23583	-2.35516	0.011919	0.0472089
Gmip	ENSMUSG00000036246	Gem-interacting protein	-1.23716	-2.35734	0.000922885	0.010949
Trim30a	ENSMUSG00000030921	tripartite motif-containing 30A	-1.24256	-2.36618	0.0103176	0.043358
Dcaf12	ENSMUSG00000028436	DDB1 and CUL4 associated factor 12	-1.24505	-2.37027	0.00412638	0.0256201
Plcg2	ENSMUSG00000034330	phospholipase C, gamma 2	-1.24716	-2.37374	0.00459933	0.0273043
Senp2	ENSMUSG00000022855	SUMO/sentrin specific peptidase 2	-1.24769	-2.37462	0.000356846	0.00617637
Bin3	ENSMUSG00000022089	bridging integrator 3	-1.24815	-2.37536	0.000708893	0.00956826
Tnrc18	ENSMUSG00000039477	trinucleotide repeat containing 18	-1.24842	-2.37582	0.00131422	0.0133913
Lrrc8d	ENSMUSG00000046079	leucine rich repeat containing 8D	-1.24942	-2.37746	0.00263133	0.0204177
Rtf2	ENSMUSG00000027502	replication termination factor 2	-1.25094	-2.37996	0.0031244	0.0221158
Katna1	ENSMUSG00000019794	katanin p60 (ATPase-containing) subunit A1	-1.25191	-2.38156	0.00227031	0.0188701
Map3k14	ENSMUSG00000020941	mitogen-activated protein kinase kinase kinase 14	-1.25354	-2.38426	0.00066724	0.00914711
R3hdm4	ENSMUSG00000035781	R3H domain containing 4	-1.25642	-2.38901	0.00176511	0.0162789
Snx20	ENSMUSG00000031662	sorting nexin 20	-1.25817	-2.39192	0.000861273	0.0104973
Paip2	ENSMUSG00000037058	polyadenylate-binding protein-interacting protein 2	-1.25992	-2.39482	0.00347981	0.023491
Prdm2	ENSMUSG00000057637	PR domain containing 2, with ZNF domain	-1.26131	-2.39713	0.000191891	0.00435546
Tuba4a	ENSMUSG00000026202	tubulin, alpha 4A	-1.2635	-2.40077	0.0129999	0.0495031
Tlr13	ENSMUSG00000033777	toll-like receptor 13	-1.26627	-2.40539	0.00914665	0.0407787
Senp7	ENSMUSG00000052917	SUMO1/sentrin specific peptidase 7	-1.26655	-2.40586	0.00277871	0.0209397
Phyh	ENSMUSG00000026664	phytanoyl-CoA hydroxylase	-1.2728	-2.41629	0.003589	0.0238459
Sirpa	ENSMUSG00000037902	signal-regulatory protein alpha	-1.27308	-2.41676	0.0123472	0.0482993
Raf1	ENSMUSG00000000441	v-raf-leukemia viral oncogene 1	-1.2743	-2.41881	0.00232985	0.0191154
Fam107b	ENSMUSG00000026655	family with sequence similarity 107, member B	-1.27489	-2.41981	0.00277103	0.0209369
Tle3	ENSMUSG00000032280	transducin-like enhancer of split 3	-1.27696	-2.42328	0.0023656	0.0193544
Ubc	ENSMUSG00000008348	ubiquitin C	-1.28009	-2.42855	0.0127106	0.0489205
Lfng	ENSMUSG00000029570	LFNG O-fucosylpeptide 3-beta-N-acetylglucosaminyltransferase	-1.28333	-2.434	0.00197493	0.0174121
Cd33	ENSMUSG00000004609	CD33 antigen	-1.29017	-2.44556	0.00720969	0.0351264
Vav3	ENSMUSG00000033721	vav 3 oncogene	-1.29183	-2.44839	0.00351526	0.0236206
Spidr	ENSMUSG00000041974	scaffolding protein involved in DNA repair	-1.29227	-2.44913	0.000748957	0.00993792
Rab32	ENSMUSG00000019832	RAB32, member RAS oncogene family	-1.2952	-2.45411	0.00048145	0.00734575
Mirt1	ENSMUSG00000097636	myocardial infarction associated transcript 1	-1.29675	-2.45675	0.00972919	0.0419229
Slc9a3r1	ENSMUSG00000020733	solute carrier family 9 (sodium/hydrogen exchanger), member 3 regulator 1	-1.2974	-2.45786	0.00327258	0.0227818
Tpcn1	ENSMUSG00000032741	two pore channel 1	-1.3047	-2.47032	0.00457739	0.027238
Pacs1	ENSMUSG00000024855	phosphofurin acidic cluster sorting protein 1	-1.30846	-2.47678	0.0110185	0.044982
Rhof	ENSMUSG00000029449	ras homolog family member F (in filopodia)	-1.30892	-2.47757	0.00183341	0.0167459
Ier5	ENSMUSG00000056708	immediate early response 5	-1.31134	-2.48172	0.00336646	0.0230676
Ptpn6	ENSMUSG00000004266	protein tyrosine phosphatase, non-receptor type 6	-1.31185	-2.4826	0.00399429	0.0252312
Dgka	ENSMUSG00000025357	diacylglycerol kinase, alpha	-1.3138	-2.48596	0.0054822	0.0299212
Tfdp1	ENSMUSG00000038482	transcription factor Dp 1	-1.31409	-2.48645	0.0114183	0.0458133
Ezh1	ENSMUSG00000006920	enhancer of zeste 1 polycomb repressive complex 2 subunit	-1.31415	-2.48656	0.00227593	0.0188773
Mknk1	ENSMUSG00000028708	MAP kinase-interacting serine/threonine kinase 1	-1.31703	-2.49153	0.00334212	0.0230487
Zfp276	ENSMUSG00000001065	zinc finger protein (C2H2 type) 276	-1.31729	-2.49197	0.00112121	0.0122824
Jmy	ENSMUSG00000021690	junction-mediating and regulatory protein	-1.31975	-2.49622	0.00693654	0.0341245
Vrk1	ENSMUSG00000021115	vaccinia related kinase 1	-1.32104	-2.49846	0.00379583	0.0246582
Myl12b	ENSMUSG00000034868	myosin, light chain 12B, regulatory	-1.32135	-2.49899	0.000474612	0.00732467
Rb1cc1	ENSMUSG00000025907	RB1-inducible coiled-coil 1	-1.32179	-2.49976	0.000266061	0.00523666
Gpx1	ENSMUSG00000063856	glutathione peroxidase 1	-1.32447	-2.50441	0.00550426	0.0299984
Ip6k1	ENSMUSG00000032594	inositol hexaphosphate kinase 1	-1.32764	-2.50992	0.0104084	0.0434433
Arhgap23	ENSMUSG00000049807	Rho GTPase activating protein 23	-1.32775	-2.51012	0.00176152	0.0162656
Srf	ENSMUSG00000015605	serum response factor	-1.32816	-2.51082	0.0020383	0.0176763
Inpp5k	ENSMUSG00000006127	inositol polyphosphate 5-phosphatase K	-1.32964	-2.51339	0.000510742	0.00763695
Phf20l1	ENSMUSG00000072501	PHD finger protein 20-like 1	-1.3312	-2.51611	0.000442643	0.00704477
Cass4	ENSMUSG00000074570	Cas scaffolding protein family member 4	-1.33352	-2.52017	0.0114216	0.0458133
Cd82	ENSMUSG00000027215	CD82 antigen	-1.33624	-2.52493	0.00436298	0.0265307
Rnf13	ENSMUSG00000036503	ring finger protein 13	-1.3378	-2.52765	0.000212361	0.00457321
Lats2	ENSMUSG00000021959	large tumor suppressor 2	-1.33871	-2.52925	0.000548312	0.00790257
Myd88	ENSMUSG00000032508	myeloid differentiation primary response gene 88	-1.34002	-2.53154	0.00992921	0.0423586
Cyba	ENSMUSG00000006519	cytochrome b-245, alpha polypeptide	-1.34149	-2.53412	0.00784544	0.0369877
Btg1	ENSMUSG00000036478	B cell translocation gene 1, anti-proliferative	-1.3419	-2.53484	0.00182222	0.0166839
D16Ertd472e	ENSMUSG00000022864	DNA segment, Chr 16, ERATO Doi 472, expressed	-1.34367	-2.53796	0.00343024	0.023322
Arap1	ENSMUSG00000032812	ArfGAP with RhoGAP domain, ankyrin repeat and PH domain 1	-1.34702	-2.54387	0.00517222	0.0289591
Capza1	ENSMUSG00000070372	capping protein (actin filament) muscle Z-line, alpha 1	-1.35019	-2.54945	0.000938118	0.0109509
Sqor	ENSMUSG00000005803	sulfide quinone oxidoreductase	-1.35043	-2.54987	0.00608882	0.0318367
Suco	ENSMUSG00000040297	SUN domain containing ossification factor	-1.35108	-2.55104	0.00537045	0.0295073
Bst1	ENSMUSG00000029082	bone marrow stromal cell antigen 1	-1.35512	-2.55818	0.00739304	0.0357379
Rab31	ENSMUSG00000056515	RAB31, member RAS oncogene family	-1.35601	-2.55977	0.00140142	0.0139976
Il6st	ENSMUSG00000021756	interleukin 6 signal transducer	-1.35787	-2.56307	0.00713408	0.0348476
Tmcc1	ENSMUSG00000030126	transmembrane and coiled coil domains 1	-1.35841	-2.56403	0.00530057	0.0293955
Rc3h1	ENSMUSG00000040423	RING CCCH (C3H) domains 1	-1.36041	-2.56759	0.00283904	0.0212244
Rnf167	ENSMUSG00000040746	ring finger protein 167	-1.36103	-2.56869	0.00386166	0.0248834
Tprgl	ENSMUSG00000029030	transformation related protein 63 regulated like	-1.36646	-2.57837	0.0120628	0.047547
Ppm1d	ENSMUSG00000020525	protein phosphatase 1D magnesium-dependent, delta isoform	-1.36757	-2.58035	0.0128867	0.0492739
Ehd1	ENSMUSG00000024772	EH-domain containing 1	-1.37273	-2.5896	0.00415624	0.0257002
Atf3	ENSMUSG00000026628	activating transcription factor 3	-1.37659	-2.59654	0.0102698	0.0432528
Arg2	ENSMUSG00000021125	arginase type II	-1.37767	-2.59848	0.00089145	0.0107017
P2ry2	ENSMUSG00000032860	purinergic receptor P2Y, G-protein coupled 2	-1.38276	-2.60766	0.00123183	0.0128101
Cd44	ENSMUSG00000005087	CD44 antigen	-1.38601	-2.61354	0.0065792	0.0330968
Sec14l1	ENSMUSG00000020823	SEC14-like lipid binding 1	-1.3948	-2.62953	0.00576677	0.0308524
Adrb2	ENSMUSG00000045730	adrenergic receptor, beta 2	-1.40397	-2.64628	0.00321175	0.0225656
Pxn	ENSMUSG00000029528	paxillin	-1.40443	-2.64714	0.000216978	0.00460759
Snap23	ENSMUSG00000027287	synaptosomal-associated protein 23	-1.4104	-2.65811	0.00106199	0.011945
Elmsan1	ENSMUSG00000042507	ELM2 and Myb/SANT-like domain containing 1	-1.41129	-2.65974	0.000405232	0.00669295
Nfkbil1	ENSMUSG00000042419	nuclear factor of kappa light polypeptide gene enhancer in B cells inhibitor like 1	-1.41219	-2.66141	0.00269089	0.0205228
Ogfrl1	ENSMUSG00000026158	opioid growth factor receptor-like 1	-1.41317	-2.66321	0.00557073	0.0302519
Numb	ENSMUSG00000021224	NUMB endocytic adaptor protein	-1.41447	-2.66561	5.11029e-05	0.00221378
Gnai2	ENSMUSG00000032562	guanine nucleotide binding protein (G protein), alpha inhibiting 2	-1.41833	-2.67275	0.00351754	0.0236206
Alox5	ENSMUSG00000025701	arachidonate 5-lipoxygenase	-1.41915	-2.67428	0.000397678	0.00662244
Aacs	ENSMUSG00000029482	acetoacetyl-CoA synthetase	-1.42193	-2.67944	0.000113001	0.00330758
Ino80c	ENSMUSG00000047989	INO80 complex subunit C	-1.42721	-2.68927	0.0100447	0.0426602
Notch1	ENSMUSG00000026923	notch 1	-1.42875	-2.69214	0.00640536	0.0326557
Jdp2	ENSMUSG00000034271	Jun dimerization protein 2	-1.42949	-2.69351	0.00372626	0.0244019
Srgn	ENSMUSG00000020077	serglycin	-1.43015	-2.69475	0.00115673	0.0123637
Msl2	ENSMUSG00000066415	MSL complex subunit 2	-1.43505	-2.70391	0.00305069	0.0219092
Cpne2	ENSMUSG00000034361	copine II	-1.43556	-2.70487	0.00085338	0.0104684
Ppp1r3d	ENSMUSG00000049999	protein phosphatase 1, regulatory subunit 3D	-1.44018	-2.71354	0.00616366	0.0320265
Arpc5	ENSMUSG00000008475	actin related protein 2/3 complex, subunit 5	-1.44093	-2.71495	0.00022421	0.0046568
Csf2ra	ENSMUSG00000059326	colony stimulating factor 2 receptor, alpha, low-affinity (granulocyte-macrophage)	-1.44479	-2.72224	0.0051125	0.0287948
Cdk2ap2	ENSMUSG00000024856	CDK2-associated protein 2	-1.44605	-2.72461	0.000833847	0.0103606
Pten	ENSMUSG00000013663	phosphatase and tensin homolog	-1.45558	-2.74267	0.00630659	0.0324798
Ccnk	ENSMUSG00000021258	cyclin K	-1.4571	-2.74555	0.00300941	0.0217694
Sp2	ENSMUSG00000018678	Sp2 transcription factor	-1.45865	-2.7485	0.00614087	0.03193
Gadd45a	ENSMUSG00000036390	growth arrest and DNA-damage-inducible 45 alpha	-1.45941	-2.74996	0.00212733	0.0180597
Ralgapa1	ENSMUSG00000021027	Ral GTPase activating protein, alpha subunit 1	-1.46222	-2.75532	9.56372e-05	0.0030984
Dgat1	ENSMUSG00000022555	diacylglycerol O-acyltransferase 1	-1.46465	-2.75997	0.00787883	0.037076
Mxd1	ENSMUSG00000001156	MAX dimerization protein 1	-1.46542	-2.76143	0.00394102	0.0250435
Lpcat2	ENSMUSG00000033192	lysophosphatidylcholine acyltransferase 2	-1.46648	-2.76346	0.000838497	0.0103867
Irf2	ENSMUSG00000031627	interferon regulatory factor 2	-1.46667	-2.76383	1.96906e-05	0.00129804
Ogt	ENSMUSG00000034160	O-linked N-acetylglucosamine (GlcNAc) transferase (UDP-N-acetylglucosamine:polypeptide-N-acetylglucosaminyl transferase)	-1.4713	-2.77271	0.000170081	0.00418631
Clk1	ENSMUSG00000026034	CDC-like kinase 1	-1.47169	-2.77347	0.000186487	0.00431023
Pygl	ENSMUSG00000021069	liver glycogen phosphorylase	-1.47485	-2.77954	0.00857339	0.0390125
Acox3	ENSMUSG00000029098	acyl-Coenzyme A oxidase 3, pristanoyl	-1.47969	-2.78889	0.00208142	0.0179106
Tut7	ENSMUSG00000035248	terminal uridylyl transferase 7	-1.48024	-2.78995	0.000104513	0.00316926
Arap3	ENSMUSG00000024451	ArfGAP with RhoGAP domain, ankyrin repeat and PH domain 3	-1.48558	-2.8003	0.00612374	0.0319294
Ppp1r12a	ENSMUSG00000019907	protein phosphatase 1, regulatory subunit 12A	-1.48586	-2.80084	0.00143683	0.014194
Zfp831	ENSMUSG00000050600	zinc finger protein 831	-1.48739	-2.80381	0.00477958	0.0277443
Gfod1	ENSMUSG00000051335	glucose-fructose oxidoreductase domain containing 1	-1.49693	-2.82242	0.00417296	0.0257621
Card9	ENSMUSG00000026928	caspase recruitment domain family, member 9	-1.50005	-2.82853	0.00027312	0.0052685
Ccdc97	ENSMUSG00000002608	coiled-coil domain containing 97	-1.50272	-2.83377	0.000522031	0.00771445
Mical1	ENSMUSG00000019823	microtubule associated monooxygenase, calponin and LIM domain containing 1	-1.51177	-2.85159	2.13566e-05	0.0013838
Mctp2	ENSMUSG00000032776	multiple C2 domains, transmembrane 2	-1.51186	-2.85178	0.0108327	0.0445593
Arpc3	ENSMUSG00000029465	actin related protein 2/3 complex, subunit 3	-1.51703	-2.86202	0.000135052	0.00361778
Pstpip2	ENSMUSG00000025429	proline-serine-threonine phosphatase-interacting protein 2	-1.51937	-2.86666	0.000910093	0.0108557
Tlr2	ENSMUSG00000027995	toll-like receptor 2	-1.52682	-2.8815	0.00676906	0.0336721
Syk	ENSMUSG00000021457	spleen tyrosine kinase	-1.52846	-2.88479	0.00245354	0.0197308
Trp53inp1	ENSMUSG00000028211	transformation related protein 53 inducible nuclear protein 1	-1.52924	-2.88633	0.000381835	0.00650492
Ttc7	ENSMUSG00000036918	tetratricopeptide repeat domain 7	-1.53441	-2.89671	0.0129885	0.0495031
Herc4	ENSMUSG00000020064	hect domain and RLD 4	-1.5419	-2.91177	7.56517e-05	0.00269256
Ccr1	ENSMUSG00000025804	chemokine (C-C motif) receptor 1	-1.54815	-2.92441	0.000104281	0.00316926
Bcl3	ENSMUSG00000053175	B cell leukemia/lymphoma 3	-1.54997	-2.92812	0.00304768	0.0219092
Dgat2	ENSMUSG00000030747	diacylglycerol O-acyltransferase 2	-1.55044	-2.92907	0.0060258	0.0316793
Slfn4	ENSMUSG00000000204	schlafen 4	-1.55129	-2.9308	0.0104664	0.0436204
Gla	ENSMUSG00000031266	galactosidase, alpha	-1.5515	-2.93122	0.00783578	0.0369652
Tbc1d15	ENSMUSG00000020130	TBC1 domain family, member 15	-1.55183	-2.93188	3.55105e-05	0.00184387
Ppt1	ENSMUSG00000028657	palmitoyl-protein thioesterase 1	-1.55213	-2.9325	0.000354773	0.00615455
Ckap4	ENSMUSG00000046841	cytoskeleton-associated protein 4	-1.55493	-2.93819	0.0050205	0.0285097
Notch2	ENSMUSG00000027878	notch 2	-1.55535	-2.93905	0.00835222	0.0384723
Asap1	ENSMUSG00000022377	ArfGAP with SH3 domain, ankyrin repeat and PH domain1	-1.5557	-2.93977	2.90055e-05	0.00163757
Sesn2	ENSMUSG00000028893	sestrin 2	-1.55639	-2.94118	0.000169877	0.00418631
Mid1ip1	ENSMUSG00000008035	Mid1 interacting protein 1 (gastrulation specific G12-like (zebrafish))	-1.55648	-2.94134	0.00504604	0.0285478
Antxr2	ENSMUSG00000029338	anthrax toxin receptor 2	-1.5573	-2.94303	0.00351878	0.0236206
Gripap1	ENSMUSG00000031153	GRIP1 associated protein 1	-1.5635	-2.95571	1.17582e-05	0.00103863
Sbno2	ENSMUSG00000035673	strawberry notch 2	-1.56805	-2.96504	0.00630195	0.0324798
Daglb	ENSMUSG00000039206	diacylglycerol lipase, beta	-1.57486	-2.97907	0.00561836	0.0304056
Cnr2	ENSMUSG00000062585	cannabinoid receptor 2 (macrophage)	-1.57683	-2.98314	0.0104103	0.0434433
Galnt6	ENSMUSG00000037280	polypeptide N-acetylgalactosaminyltransferase 6	-1.57857	-2.98673	0.0118146	0.0470165
Map1lc3b	ENSMUSG00000031812	microtubule-associated protein 1 light chain 3 beta	-1.58114	-2.99206	5.26158e-05	0.002216
Tyrobp	ENSMUSG00000030579	TYRO protein tyrosine kinase binding protein	-1.58189	-2.99362	0.00490099	0.02819
Arhgap30	ENSMUSG00000048865	Rho GTPase activating protein 30	-1.58331	-2.99656	0.000109917	0.00324023
C5ar1	ENSMUSG00000049130	complement component 5a receptor 1	-1.58435	-2.99872	0.00742353	0.0357546
Cd52	ENSMUSG00000000682	CD52 antigen	-1.58448	-2.999	0.00267536	0.0204868
Acod1	ENSMUSG00000022126	aconitate decarboxylase 1	-1.5855	-3.00113	0.0129013	0.0492775
Gpcpd1	ENSMUSG00000027346	glycerophosphocholine phosphodiesterase 1	-1.58844	-3.00724	0.000931551	0.0109509
Stk40	ENSMUSG00000042608	serine/threonine kinase 40	-1.59046	-3.01146	0.000106866	0.00318957
Cd244a	ENSMUSG00000004709	CD244 molecule A	-1.60156	-3.03471	0.0047327	0.0276459
Entpd1	ENSMUSG00000048120	ectonucleoside triphosphate diphosphohydrolase 1	-1.60513	-3.04223	0.000269108	0.00523666
Fos	ENSMUSG00000021250	FBJ osteosarcoma oncogene	-1.60724	-3.04669	0.0114089	0.0458108
Cd53	ENSMUSG00000040747	CD53 antigen	-1.61586	-3.06494	0.00187193	0.0168954
Zfp740	ENSMUSG00000046897	zinc finger protein 740	-1.61651	-3.06632	9.05248e-05	0.00301926
Nrros	ENSMUSG00000052384	negative regulator of reactive oxygen species	-1.61703	-3.06744	0.00250446	0.0199646
Slc44a2	ENSMUSG00000057193	solute carrier family 44, member 2	-1.62366	-3.08156	0.00296202	0.021633
Cep85l	ENSMUSG00000038594	centrosomal protein 85-like	-1.62564	-3.0858	0.00276055	0.0209068
Tpd52	ENSMUSG00000027506	tumor protein D52	-1.63415	-3.10405	2.49477e-05	0.0014892
Btg2	ENSMUSG00000020423	B cell translocation gene 2, anti-proliferative	-1.63445	-3.10469	0.00199217	0.0175204
Siglece	ENSMUSG00000030474	sialic acid binding Ig-like lectin E	-1.63463	-3.10509	0.00105854	0.0119239
Ing3	ENSMUSG00000029670	inhibitor of growth family, member 3	-1.63733	-3.11089	0.000102289	0.00316926
Pfkfb4	ENSMUSG00000025648	6-phosphofructo-2-kinase/fructose-2,6-biphosphatase 4	-1.63835	-3.1131	0.00013952	0.00368537
Arl13b	ENSMUSG00000022911	ADP-ribosylation factor-like 13B	-1.64359	-3.12442	0.000712203	0.00957208
Pik3cd	ENSMUSG00000039936	phosphatidylinositol-4,5-bisphosphate 3-kinase catalytic subunit delta	-1.64801	-3.13401	0.000774866	0.0100073
Dok3	ENSMUSG00000035711	docking protein 3	-1.65587	-3.15113	0.0087914	0.0397185
Pnpla2	ENSMUSG00000025509	patatin-like phospholipase domain containing 2	-1.66035	-3.16092	0.000277839	0.00528733
Klf3	ENSMUSG00000029178	Kruppel-like factor 3 (basic)	-1.66422	-3.16942	0.00201335	0.0175876
Cwc25	ENSMUSG00000018541	CWC25 spliceosome-associated protein	-1.66591	-3.17313	0.00145126	0.0143069
Spi1	ENSMUSG00000002111	spleen focus forming virus (SFFV) proviral integration oncogene	-1.66778	-3.17725	0.00747004	0.0358354
Adipor1	ENSMUSG00000026457	adiponectin receptor 1	-1.67101	-3.18437	0.000428008	0.00693318
Rab27a	ENSMUSG00000032202	RAB27A, member RAS oncogene family	-1.67549	-3.19429	0.00911524	0.0407205
Acpp	ENSMUSG00000032561	acid phosphatase, prostate	-1.68051	-3.20542	0.00727103	0.0353571
Midn	ENSMUSG00000035621	midnolin	-1.68369	-3.21248	0.00797149	0.0374571
Rassf5	ENSMUSG00000026430	Ras association (RalGDS/AF-6) domain family member 5	-1.6875	-3.22097	8.3366e-05	0.0028563
2007-03-01	ENSMUSG00000026977	membrane-associated ring finger (C3HC4) 7	-1.68854	-3.22329	0.000453158	0.00712679
Rnf44	ENSMUSG00000034928	ring finger protein 44	-1.69043	-3.22753	0.00340988	0.0232467
Rnf149	ENSMUSG00000048234	ring finger protein 149	-1.69434	-3.23628	0.00685936	0.0339165
Nlrp3	ENSMUSG00000032691	NLR family, pyrin domain containing 3	-1.69453	-3.23671	0.00249377	0.0199003
Mettl9	ENSMUSG00000030876	methyltransferase like 9	-1.69561	-3.23913	0.000624584	0.0086721
Pilra	ENSMUSG00000046245	paired immunoglobin-like type 2 receptor alpha	-1.69575	-3.23944	0.000101241	0.00316926
Hmgn2	ENSMUSG00000003038	high mobility group nucleosomal binding domain 2	-1.70114	-3.25159	0.00199697	0.0175423
Gad1-ps	ENSMUSG00000090665	glutamate decarboxylase 1, pseudogene	-1.70551	-3.26144	0.0035319	0.0236206
Cd84	ENSMUSG00000038147	CD84 antigen	-1.70684	-3.26445	0.000173074	0.00419799
H2-D1	ENSMUSG00000073411	histocompatibility 2, D region locus 1	-1.70808	-3.26725	0.000569112	0.00812512
Myo1f	ENSMUSG00000024300	myosin IF	-1.71114	-3.2742	0.000585294	0.00826278
Grk6	ENSMUSG00000074886	G protein-coupled receptor kinase 6	-1.71193	-3.276	0.00674352	0.0336126
Prr13	ENSMUSG00000023048	proline rich 13	-1.7126	-3.27751	0.000247552	0.00504488
Clec7a	ENSMUSG00000079293	C-type lectin domain family 7, member a	-1.7127	-3.27774	0.000161904	0.00406422
Rap1b	ENSMUSG00000052681	RAS related protein 1b	-1.71614	-3.28556	0.000860052	0.0104973
Fem1c	ENSMUSG00000033319	fem-1 homolog c (C.elegans)	-1.72293	-3.30107	0.00156108	0.0151725
Tbc1d14	ENSMUSG00000029192	TBC1 domain family, member 14	-1.72901	-3.31501	4.04995e-06	0.000644355
Jaml	ENSMUSG00000048534	junction adhesion molecule like	-1.72972	-3.31664	0.00709446	0.0347212
Klf2	ENSMUSG00000055148	Kruppel-like factor 2 (lung)	-1.72988	-3.31701	0.0131422	0.0497907
S100a11	ENSMUSG00000027907	S100 calcium binding protein A11	-1.73385	-3.32613	0.000939467	0.0109509
Adgre5	ENSMUSG00000002885	adhesion G protein-coupled receptor E5	-1.73473	-3.32816	0.0121714	0.0478059
Nr4a1	ENSMUSG00000023034	nuclear receptor subfamily 4, group A, member 1	-1.73495	-3.32867	0.00127683	0.0130806
Smarca2	ENSMUSG00000024921	SWI/SNF related, matrix associated, actin dependent regulator of chromatin, subfamily a, member 2	-1.73528	-3.32944	5.60516e-06	0.000745486
Trib1	ENSMUSG00000032501	tribbles pseudokinase 1	-1.74236	-3.34583	0.00927849	0.0411587
Ddit3	ENSMUSG00000025408	DNA-damage inducible transcript 3	-1.74512	-3.35224	0.00335794	0.0230676
Lmnb1	ENSMUSG00000024590	lamin B1	-1.74555	-3.35323	0.000678518	0.00926819
Nfam1	ENSMUSG00000058099	Nfat activating molecule with ITAM motif 1	-1.74707	-3.35676	0.00284886	0.0212367
Tspan13	ENSMUSG00000020577	tetraspanin 13	-1.74825	-3.3595	0.000283387	0.00531787
Nhsl2	ENSMUSG00000079481	NHS-like 2	-1.74951	-3.36244	0.00170291	0.0159973
Srpk2	ENSMUSG00000062604	serine/arginine-rich protein specific kinase 2	-1.75491	-3.37506	0.000417044	0.00679916
Bcl6	ENSMUSG00000022508	B cell leukemia/lymphoma 6	-1.75573	-3.37698	0.000558259	0.00803066
Il17ra	ENSMUSG00000002897	interleukin 17 receptor A	-1.76061	-3.38842	0.000413466	0.00678461
Arhgap25	ENSMUSG00000030047	Rho GTPase activating protein 25	-1.76268	-3.39327	0.000269397	0.00523666
Cdk11b	ENSMUSG00000029062	cyclin-dependent kinase 11B	-1.76522	-3.39925	0.000155438	0.00398099
Coro1a	ENSMUSG00000030707	coronin, actin binding protein 1A	-1.76589	-3.40083	0.00133353	0.0134794
Fgl2	ENSMUSG00000039899	fibrinogen-like protein 2	-1.76697	-3.40339	0.00111649	0.0122668
Sh3glb1	ENSMUSG00000037062	SH3-domain GRB2-like B1 (endophilin)	-1.76874	-3.40757	4.10215e-05	0.00195587
Hdc	ENSMUSG00000027360	histidine decarboxylase	-1.77345	-3.41871	0.000907307	0.010849
Dennd4a	ENSMUSG00000053641	DENN/MADD domain containing 4A	-1.77501	-3.42241	0.000490171	0.00746181
Ccdc189	ENSMUSG00000057176	coiled-coil domain containing 189	-1.77918	-3.43231	0.00295314	0.0216014
Lyn	ENSMUSG00000042228	LYN proto-oncogene, Src family tyrosine kinase	-1.78014	-3.4346	4.63121e-05	0.00210968
Rasgrp2	ENSMUSG00000032946	RAS, guanyl releasing protein 2	-1.78098	-3.43659	0.00767109	0.0364117
Abcd2	ENSMUSG00000055782	ATP-binding cassette, sub-family D (ALD), member 2	-1.78243	-3.44006	0.00028203	0.00531787
Abtb1	ENSMUSG00000030083	ankyrin repeat and BTB (POZ) domain containing 1	-1.78304	-3.44151	0.000438346	0.0070119
Pag1	ENSMUSG00000027508	phosphoprotein associated with glycosphingolipid microdomains 1	-1.79521	-3.47066	0.00116695	0.0124251
Map3k15	ENSMUSG00000031303	mitogen-activated protein kinase kinase kinase 15	-1.79739	-3.4759	0.000461421	0.00717223
Cnn2	ENSMUSG00000004665	calponin 2	-1.79883	-3.47938	0.00203271	0.017672
Fmnl1	ENSMUSG00000055805	formin-like 1	-1.80129	-3.48533	0.00678494	0.0337289
Mapk14	ENSMUSG00000053436	mitogen-activated protein kinase 14	-1.80551	-3.49553	0.000384856	0.00651637
Sde2	ENSMUSG00000038806	SDE2 telomere maintenance homolog (S. pombe)	-1.81377	-3.51559	3.08345e-05	0.00166969
Homer1	ENSMUSG00000007617	homer scaffolding protein 1	-1.81396	-3.51607	0.00118856	0.0125494
Emb	ENSMUSG00000021728	embigin	-1.81606	-3.52117	0.000869303	0.0105598
Sephs2	ENSMUSG00000049091	selenophosphate synthetase 2	-1.82054	-3.53213	0.00451509	0.0270432
Pip4k2a	ENSMUSG00000026737	phosphatidylinositol-5-phosphate 4-kinase, type II, alpha	-1.82231	-3.53647	4.23171e-05	0.00199258
Tgfbi	ENSMUSG00000035493	transforming growth factor, beta induced	-1.82493	-3.54291	0.00336682	0.0230676
Il6ra	ENSMUSG00000027947	interleukin 6 receptor, alpha	-1.82808	-3.55065	5.19454e-05	0.002216
Hmgb2	ENSMUSG00000054717	high mobility group box 2	-1.83206	-3.56046	0.000173894	0.00419799
Pstpip1	ENSMUSG00000032322	proline-serine-threonine phosphatase-interacting protein 1	-1.83445	-3.56636	0.000735174	0.009795
Prkcb	ENSMUSG00000052889	protein kinase C, beta	-1.84464	-3.59164	1.78397e-05	0.00121443
Rac2	ENSMUSG00000033220	Rac family small GTPase 2	-1.84719	-3.59799	0.000535966	0.00782741
Sun2	ENSMUSG00000042524	Sad1 and UNC84 domain containing 2	-1.849	-3.60249	0.000578196	0.00820843
Iqsec1	ENSMUSG00000034312	IQ motif and Sec7 domain 1	-1.85065	-3.60663	9.38903e-05	0.00308131
Samhd1	ENSMUSG00000027639	SAM domain and HD domain, 1	-1.85436	-3.61591	0.000127316	0.00347189
Marcks	ENSMUSG00000069662	myristoylated alanine rich protein kinase C substrate	-1.85532	-3.61831	0.00330313	0.0228894
Ifitm3	ENSMUSG00000025492	interferon induced transmembrane protein 3	-1.85743	-3.62362	0.00221336	0.0186025
Ankrd13a	ENSMUSG00000041870	ankyrin repeat domain 13a	-1.86348	-3.63883	0.000335297	0.00590129
Klf6	ENSMUSG00000000078	Kruppel-like factor 6	-1.86966	-3.65448	0.000682539	0.00930634
Armc7	ENSMUSG00000057219	armadillo repeat containing 7	-1.87093	-3.65768	4.04621e-05	0.00195587
Atg101	ENSMUSG00000037204	autophagy related 101	-1.87439	-3.66646	2.63925e-05	0.00154352
Ankrd33b	ENSMUSG00000022237	ankyrin repeat domain 33B	-1.87627	-3.67125	0.00186277	0.0168954
Trim30b	ENSMUSG00000052749	tripartite motif-containing 30B	-1.88242	-3.68694	0.0017543	0.0162385
Fcgr4	ENSMUSG00000059089	Fc receptor, IgG, low affinity IV	-1.88312	-3.68871	0.00645053	0.0327974
Arhgap45	ENSMUSG00000035697	Rho GTPase activating protein 45	-1.88388	-3.69067	0.00290731	0.0215028
F5	ENSMUSG00000026579	coagulation factor V	-1.88455	-3.69239	0.00252062	0.0200154
Sfxn5	ENSMUSG00000033720	sideroflexin 5	-1.88726	-3.69933	2.491e-06	0.000524564
Fosb	ENSMUSG00000003545	FBJ osteosarcoma oncogene B	-1.89308	-3.71428	0.0037274	0.0244019
Rnf11	ENSMUSG00000028557	ring finger protein 11	-1.89969	-3.73134	0.000280245	0.0052981
Fam129a	ENSMUSG00000026483	family with sequence similarity 129, member A	-1.90706	-3.75044	0.000207068	0.00457321
Rdh12	ENSMUSG00000021123	retinol dehydrogenase 12	-1.91198	-3.76326	0.00648269	0.0328351
Akna	ENSMUSG00000039158	AT-hook transcription factor	-1.91705	-3.7765	0.000206321	0.00457321
Rhog	ENSMUSG00000073982	ras homolog family member G	-1.92456	-3.79622	0.000214736	0.0045869
Grina	ENSMUSG00000022564	glutamate receptor, ionotropic, N-methyl D-aspartate-associated protein 1 (glutamate binding)	-1.92927	-3.80861	0.00197526	0.0174121
Usp32	ENSMUSG00000000804	ubiquitin specific peptidase 32	-1.93242	-3.81695	0.000168103	0.00416675
Actg1	ENSMUSG00000062825	actin, gamma, cytoplasmic 1	-1.93284	-3.81807	0.011164	0.0453805
Atg3	ENSMUSG00000022663	autophagy related 3	-1.93784	-3.83133	7.39944e-05	0.00268398
Was	ENSMUSG00000031165	Wiskott-Aldrich syndrome	-1.93945	-3.8356	3.70583e-05	0.0018714
Asprv1	ENSMUSG00000033508	aspartic peptidase, retroviral-like 1	-1.94001	-3.83708	4.65356e-05	0.00210968
Ptprc	ENSMUSG00000026395	protein tyrosine phosphatase, receptor type, C	-1.94343	-3.8462	0.0039174	0.0249771
Mbp	ENSMUSG00000041607	myelin basic protein	-1.95317	-3.87224	1.65178e-05	0.0011703
Sorl1	ENSMUSG00000049313	sortilin-related receptor, LDLR class A repeats-containing	-1.96076	-3.89266	0.00947116	0.0414506
Kdm6b	ENSMUSG00000018476	KDM1 lysine (K)-specific demethylase 6B	-1.96331	-3.89956	0.00118216	0.0125354
Ndel1	ENSMUSG00000018736	nudE neurodevelopment protein 1 like 1	-1.96669	-3.9087	0.000177049	0.00423981
Ifitm2	ENSMUSG00000060591	interferon induced transmembrane protein 2	-1.96812	-3.91258	0.000416402	0.00679916
Zyx	ENSMUSG00000029860	zyxin	-1.97077	-3.91978	3.05486e-05	0.00166611
Pilrb2	ENSMUSG00000066682	paired immunoglobin-like type 2 receptor beta 2	-1.9765	-3.93536	0.000178566	0.0042436
Sp100	ENSMUSG00000026222	nuclear antigen Sp100	-1.98268	-3.95226	0.000198759	0.0044712
Oas3	ENSMUSG00000032661	2'-5' oligoadenylate synthetase 3	-1.99308	-3.98087	0.000773356	0.0100048
Prex1	ENSMUSG00000039621	phosphatidylinositol-3,4,5-trisphosphate-dependent Rac exchange factor 1	-1.99319	-3.98117	7.77372e-06	0.000866656
Lbr	ENSMUSG00000004880	lamin B receptor	-1.99461	-3.98507	2.03305e-05	0.00132867
Kpna4	ENSMUSG00000027782	karyopherin (importin) alpha 4	-1.99659	-3.99055	0.000315705	0.0057093
Rasgrp4	ENSMUSG00000030589	RAS guanyl releasing protein 4	-2.00004	-4.00011	6.13588e-06	0.000788409
Dock11	ENSMUSG00000031093	dedicator of cytokinesis 11	-2.01017	-4.02831	1.45189e-05	0.0011118
Acta2	ENSMUSG00000035783	actin, alpha 2, smooth muscle, aorta	-2.02372	-4.06631	0.00189521	0.0170082
Nlrp12	ENSMUSG00000078817	NLR family, pyrin domain containing 12	-2.02391	-4.06685	0.000270508	0.00524481
Kif23	ENSMUSG00000032254	kinesin family member 23	-2.0309	-4.0866	5.14618e-05	0.002216
Slc15a3	ENSMUSG00000024737	solute carrier family 15, member 3	-2.03414	-4.09579	0.000102001	0.00316926
Per1	ENSMUSG00000020893	period circadian clock 1	-2.03442	-4.09659	9.08048e-05	0.00301926
Msra	ENSMUSG00000054733	methionine sulfoxide reductase A	-2.03494	-4.09805	0.0010722	0.0120064
Map4k2	ENSMUSG00000024948	mitogen-activated protein kinase kinase kinase kinase 2	-2.04045	-4.11375	1.33884e-06	0.000407129
Dusp1	ENSMUSG00000024190	dual specificity phosphatase 1	-2.0451	-4.12702	0.00229186	0.0189679
Acvrl1	ENSMUSG00000000530	activin A receptor, type II-like 1	-2.04552	-4.12823	0.00730727	0.0354197
Rasa3	ENSMUSG00000031453	RAS p21 protein activator 3	-2.04947	-4.13954	0.000168187	0.00416675
Pik3r5	ENSMUSG00000020901	phosphoinositide-3-kinase regulatory subunit 5	-2.06346	-4.17988	1.27705e-05	0.0010499
Gcnt2	ENSMUSG00000021360	glucosaminyl (N-acetyl) transferase 2, I-branching enzyme	-2.06809	-4.19331	1.77719e-05	0.00121443
Taf7	ENSMUSG00000051316	TATA-box binding protein associated factor 7	-2.08443	-4.24108	0.000606033	0.00846102
Il15	ENSMUSG00000031712	interleukin 15	-2.0874	-4.2498	0.00224563	0.0187913
Grk5	ENSMUSG00000003228	G protein-coupled receptor kinase 5	-2.09032	-4.25841	5.99858e-05	0.00234408
Pik3r6	ENSMUSG00000046207	phosphoinositide-3-kinase regulatory subunit 5	-2.0914	-4.26161	8.62188e-05	0.00291797
Csf3r	ENSMUSG00000028859	colony stimulating factor 3 receptor (granulocyte)	-2.09385	-4.26887	0.00114303	0.0123358
Vamp3	ENSMUSG00000028955	vesicle-associated membrane protein 3	-2.09413	-4.26968	0.000211811	0.00457321
Dirc2	ENSMUSG00000022848	disrupted in renal carcinoma 2 (human)	-2.09546	-4.27362	0.000870881	0.0105598
Impact	ENSMUSG00000024423	impact, RWD domain protein	-2.09757	-4.27987	0.000208865	0.00457321
Tfip11	ENSMUSG00000029345	tuftelin interacting protein 11	-2.09901	-4.28415	1.93039e-05	0.00128371
Slc16a3	ENSMUSG00000025161	solute carrier family 16 (monocarboxylic acid transporters), member 3	-2.10267	-4.29503	0.0121832	0.0478059
Trem1	ENSMUSG00000042265	triggering receptor expressed on myeloid cells 1	-2.10696	-4.30783	2.21067e-05	0.00140087
Rasip1	ENSMUSG00000044562	Ras interacting protein 1	-2.11012	-4.31726	1.79166e-06	0.000452752
Smap2	ENSMUSG00000032870	small ArfGAP 2	-2.11479	-4.33128	0.000153116	0.00397525
Kif21b	ENSMUSG00000041642	kinesin family member 21B	-2.11897	-4.34384	1.17824e-05	0.00103863
Cxcr2	ENSMUSG00000026180	chemokine (C-X-C motif) receptor 2	-2.1209	-4.34966	3.71146e-05	0.0018714
Map3k5	ENSMUSG00000071369	mitogen-activated protein kinase kinase kinase 5	-2.12616	-4.36554	1.79418e-05	0.00121443
Arhgap9	ENSMUSG00000040345	Rho GTPase activating protein 9	-2.1355	-4.3939	0.000119883	0.00340385
Cyfip2	ENSMUSG00000020340	cytoplasmic FMR1 interacting protein 2	-2.14028	-4.40847	1.488e-05	0.00111688
Rcsd1	ENSMUSG00000040723	RCSD domain containing 1	-2.14108	-4.41092	1.21284e-05	0.00104484
Ripor2	ENSMUSG00000036006	RHO family interacting cell polarization regulator 2	-2.14247	-4.41517	0.000435559	0.00701057
Sp140	ENSMUSG00000070031	Sp140 nuclear body protein	-2.1433	-4.4177	0.000298324	0.00547959
Clec4d	ENSMUSG00000030144	C-type lectin domain family 4, member d	-2.1506	-4.44013	6.99628e-05	0.0025747
Stk10	ENSMUSG00000020272	serine/threonine kinase 10	-2.15418	-4.45114	1.7064e-05	0.00119741
E2f2	ENSMUSG00000018983	E2F transcription factor 2	-2.15834	-4.464	0.00457321	0.0272345
Rassf3	ENSMUSG00000025795	Ras association (RalGDS/AF-6) domain family member 3	-2.18033	-4.53257	5.10088e-05	0.00221378
Lilra6	ENSMUSG00000030427	leukocyte immunoglobulin-like receptor, subfamily A (with TM domain), member 6	-2.20952	-4.62522	1.05663e-05	0.00102696
Itga4	ENSMUSG00000027009	integrin alpha 4	-2.21269	-4.63539	2.5691e-05	0.00152159
C5ar2	ENSMUSG00000074361	complement component 5a receptor 2	-2.22716	-4.6821	7.60896e-06	0.000863239
Myadm	ENSMUSG00000068566	myeloid-associated differentiation marker	-2.22861	-4.68684	0.00986808	0.0421702
Prkar2b	ENSMUSG00000002997	protein kinase, cAMP dependent regulatory, type II beta	-2.23735	-4.71529	0.00579133	0.0309401
Fxyd5	ENSMUSG00000009687	FXYD domain-containing ion transport regulator 5	-2.24515	-4.74085	2.46566e-05	0.0014835
Ncf2	ENSMUSG00000026480	neutrophil cytosolic factor 2	-2.25666	-4.77885	0.000106672	0.00318957
Pirb	ENSMUSG00000058818	paired Ig-like receptor B	-2.2647	-4.80554	4.34593e-06	0.000650332
Zfand2a	ENSMUSG00000053581	zinc finger, AN1-type domain 2A	-2.28041	-4.85816	0.00238585	0.019386
Vps37b	ENSMUSG00000066278	vacuolar protein sorting 37B	-2.28366	-4.86912	6.61021e-05	0.00245647
Hck	ENSMUSG00000003283	hemopoietic cell kinase	-2.29068	-4.89287	1.39562e-06	0.000407129
Vim	ENSMUSG00000026728	vimentin	-2.30409	-4.93856	0.00032692	0.00580484
Apobec1	ENSMUSG00000040613	apolipoprotein B mRNA editing enzyme, catalytic polypeptide 1	-2.32606	-5.01434	0.000387667	0.00651637
Glrx	ENSMUSG00000021591	glutaredoxin	-2.32636	-5.01537	0.00143793	0.014194
Sash3	ENSMUSG00000031101	SAM and SH3 domain containing 3	-2.32842	-5.02255	0.000171193	0.00418651
S100a8	ENSMUSG00000056054	S100 calcium binding protein A8 (calgranulin A)	-2.33656	-5.05096	0.000475281	0.00732467
Tcp11l2	ENSMUSG00000020034	t-complex 11 (mouse) like 2	-2.33885	-5.059	1.30182e-05	0.0010499
Selplg	ENSMUSG00000048163	selectin, platelet (p-selectin) ligand	-2.33937	-5.06083	1.29463e-05	0.0010499
Stk17b	ENSMUSG00000026094	serine/threonine kinase 17b (apoptosis-inducing)	-2.35104	-5.10192	0.00168157	0.0159151
Ifitm1	ENSMUSG00000025491	interferon induced transmembrane protein 1	-2.36038	-5.13506	3.83847e-06	0.000644355
Tnfrsf1a	ENSMUSG00000030341	tumor necrosis factor receptor superfamily, member 1a	-2.36243	-5.14235	0.000110273	0.00324023
Pla2g7	ENSMUSG00000023913	phospholipase A2, group VII (platelet-activating factor acetylhydrolase, plasma)	-2.37261	-5.17878	5.83216e-06	0.000762304
Atg2a	ENSMUSG00000024773	autophagy related 2A	-2.37604	-5.1911	0.000130254	0.00352662
Taldo1	ENSMUSG00000025503	transaldolase 1	-2.37813	-5.19864	5.50021e-06	0.000745486
H2-Q10	ENSMUSG00000067235	histocompatibility 2, Q region locus 10	-2.38562	-5.2257	6.63903e-06	0.000797869
Arhgap15	ENSMUSG00000049744	Rho GTPase activating protein 15	-2.39321	-5.25324	8.07765e-05	0.00282197
Prr5l	ENSMUSG00000032841	proline rich 5 like	-2.3994	-5.27583	0.000116254	0.00336384
Gda	ENSMUSG00000058624	guanine deaminase	-2.39966	-5.27679	0.000180261	0.00427049
Tmem154	ENSMUSG00000056498	transmembrane protein 154	-2.41191	-5.32179	2.91613e-05	0.00163757
Slc25a33	ENSMUSG00000028982	solute carrier family 25, member 33	-2.42019	-5.3524	0.000266112	0.00523666
Ugt1a7c	ENSMUSG00000090124	UDP glucuronosyltransferase 1 family, polypeptide A7C	-2.43728	-5.41619	0.000261259	0.00519843
Lrrc25	ENSMUSG00000049988	leucine rich repeat containing 25	-2.44254	-5.436	8.1233e-06	0.000879753
Cdh5	ENSMUSG00000031871	cadherin 5	-2.44512	-5.44571	0.00834506	0.0384723
Stx11	ENSMUSG00000039232	syntaxin 11	-2.46459	-5.51972	4.05782e-06	0.000644355
Ssh2	ENSMUSG00000037926	slingshot protein phosphatase 2	-2.46539	-5.52275	1.67851e-06	0.000438786
Trpm2	ENSMUSG00000009292	transient receptor potential cation channel, subfamily M, member 2	-2.4741	-5.55622	0.000119596	0.00340385
Itgal	ENSMUSG00000030830	integrin alpha L	-2.47648	-5.56537	0.000215399	0.0045869
Pglyrp1	ENSMUSG00000030413	peptidoglycan recognition protein 1	-2.47677	-5.56649	3.59129e-05	0.00185208
Plbd1	ENSMUSG00000030214	phospholipase B domain containing 1	-2.48942	-5.61552	1.60948e-05	0.001165
AW011738	ENSMUSG00000078349	expressed sequence AW011738	-2.48962	-5.61629	1.17066e-05	0.00103863
Cebpd	ENSMUSG00000071637	CCAAT/enhancer binding protein (C/EBP), delta	-2.51291	-5.70768	0.000125583	0.00347189
Mcemp1	ENSMUSG00000013974	mast cell expressed membrane protein 1	-2.52668	-5.76245	3.36424e-07	0.000196187
Adam8	ENSMUSG00000025473	a disintegrin and metallopeptidase domain 8	-2.54455	-5.83425	7.61215e-05	0.00269662
Sirpb1b	ENSMUSG00000095028	signal-regulatory protein beta 1B	-2.55196	-5.86431	1.51145e-05	0.00112336
Palm	ENSMUSG00000035863	paralemmin	-2.56103	-5.90129	3.81579e-06	0.000644355
Steap4	ENSMUSG00000012428	STEAP family member 4	-2.5652	-5.91835	0.00049951	0.00755036
AB124611	ENSMUSG00000057191	cDNA sequence AB124611	-2.57885	-5.97464	5.25503e-06	0.000737747
Rab11fip4	ENSMUSG00000017639	RAB11 family interacting protein 4 (class II)	-2.59847	-6.05643	0.000188999	0.0043298
Cd101	ENSMUSG00000086564	CD101 antigen	-2.59874	-6.05756	1.43349e-06	0.000407129
Slc2a3	ENSMUSG00000003153	solute carrier family 2 (facilitated glucose transporter), member 3	-2.60805	-6.09677	4.46214e-05	0.0020753
Rnf144a	ENSMUSG00000020642	ring finger protein 144A	-2.61355	-6.12009	0.000366372	0.00632681
S100a9	ENSMUSG00000056071	S100 calcium binding protein A9 (calgranulin B)	-2.63908	-6.22933	3.39348e-06	0.000627462
Ngp	ENSMUSG00000032484	neutrophilic granule protein	-2.64171	-6.24071	0.0110767	0.0450981
Slc2a6	ENSMUSG00000036067	solute carrier family 2 (facilitated glucose transporter), member 6	-2.6551	-6.2989	0.0015844	0.0152809
Aatk	ENSMUSG00000025375	apoptosis-associated tyrosine kinase	-2.68214	-6.41807	0.000278474	0.00528733
Dhrs7	ENSMUSG00000021094	dehydrogenase/reductase (SDR family) member 7	-2.68905	-6.44889	1.38029e-07	0.000130799
Fyb	ENSMUSG00000022148	FYN binding protein	-2.69961	-6.49625	1.45001e-06	0.000407129
Alox5ap	ENSMUSG00000060063	arachidonate 5-lipoxygenase activating protein	-2.73176	-6.64266	1.90989e-06	0.00046706
St8sia4	ENSMUSG00000040710	ST8 alpha-N-acetyl-neuraminide alpha-2,8-sialyltransferase 4	-2.78439	-6.88943	0.000109803	0.00324023
Atp1a3	ENSMUSG00000040907	ATPase, Na+/K+ transporting, alpha 3 polypeptide	-2.78466	-6.89075	4.07981e-06	0.000644355
Dhrs9	ENSMUSG00000027068	dehydrogenase/reductase (SDR family) member 9	-2.80279	-6.97788	3.74697e-07	0.000202899
Msrb1	ENSMUSG00000075705	methionine sulfoxide reductase B1	-2.81146	-7.01995	2.20052e-06	0.000490651
Sh2d3c	ENSMUSG00000059013	SH2 domain containing 3C	-2.86904	-7.30579	8.59196e-07	0.000296071
Hacd4	ENSMUSG00000028497	3-hydroxyacyl-CoA dehydratase 4	-2.88859	-7.40548	2.87275e-05	0.00163747
Cd300ld	ENSMUSG00000034641	CD300 molecule like family member d	-2.89113	-7.4185	7.7318e-07	0.00028115
Sell	ENSMUSG00000026581	selectin, lymphocyte	-2.94783	-7.71588	6.69243e-06	0.000797869
Slpi	ENSMUSG00000017002	secretory leukocyte peptidase inhibitor	-2.94898	-7.72204	0.000588674	0.00827966
Tbc1d10c	ENSMUSG00000040247	TBC1 domain family, member 10c	-2.96058	-7.78434	0.000185285	0.00429555
Lsp1	ENSMUSG00000018819	lymphocyte specific 1	-2.97563	-7.86603	6.9383e-07	0.000276838
Calcrl	ENSMUSG00000059588	calcitonin receptor-like	-2.98991	-7.94422	0.000374775	0.00644255
Retnlg	ENSMUSG00000022651	resistin like gamma	-2.99297	-7.96114	0.0012592	0.0130201
Cd300lb	ENSMUSG00000063193	CD300 molecule like family member B	-3.04104	-8.23085	2.64683e-06	0.000542313
Mmp8	ENSMUSG00000005800	matrix metallopeptidase 8	-3.04552	-8.25646	9.80063e-05	0.00314825
Thbd	ENSMUSG00000074743	thrombomodulin	-3.13465	-8.78262	9.79314e-06	0.000995662
Pi16	ENSMUSG00000024011	peptidase inhibitor 16	-3.17159	-9.01037	1.34693e-06	0.000407129
Fosl1	ENSMUSG00000024912	fos-like antigen 1	-3.19448	-9.15451	4.08572e-05	0.00195587
Selenon	ENSMUSG00000050989	selenoprotein N	-3.29733	-9.83091	4.37501e-06	0.000650332
Ighm	ENSMUSG00000076617	immunoglobulin heavy constant mu	-3.38717	-10.4626	0.00474437	0.0276459
Padi4	ENSMUSG00000025330	peptidyl arginine deiminase, type IV	-3.45185	-10.9423	1.25051e-05	0.0010499
Marco	ENSMUSG00000026390	macrophage receptor with collagenous structure	-3.60087	-12.1331	0.00386178	0.0248834
Prelp	ENSMUSG00000041577	proline arginine-rich end leucine-rich repeat	-4.13205	-17.5336	3.51134e-05	0.00183701
