# Supplementary material for: Ilusiones en el Derecho natural burgués
Source: Oxford University Press journal article supplement (doi:10.1158/0008-5472.can-20-2870), 1993-01-01
Supplement: 00085472can202870-sup-249908_4_supp_6908377_q799f7.xlsx [file 00085472can202870-sup-249908_4_supp_6908377_q799f7.xlsx]

## Sheet: TableS3-ORA_Hallmark_DE
GeneSet	P	FDR	GeneList
HALLMARK_GLYCOLYSIS	0.0108369	0.541847	CLDN3, FBP2, PKP2, FAM162A, PYGB, HS2ST1, MET, B3GNT3, SDC1, DSC2, ELF3
HALLMARK_INFLAMMATORY_RESPONSE	0.123786	1	HPN, HBEGF, IL1A, FFAR2, CX3CL1, MET, CDKN1A, PVR
HALLMARK_P53_PATHWAY	0.123786	1	HBEGF, IL1A, EPS8L2, FAM162A, ST14, SLC35D1, SDC1, CDKN1A
HALLMARK_TNFA_SIGNALING_VIA_NFKB	0.228039	1	HBEGF, IL1A, SDC4, LAMB3, AREG, CLCF1, CDKN1A
HALLMARK_ESTROGEN_RESPONSE_EARLY	0.228039	1	PTGES, SLC16A1, LAD1, AREG, CELSR1, ELF3, KRT18
HALLMARK_APICAL_SURFACE	0.298257	1	ATP6V0A4, CX3CL1
HALLMARK_APICAL_JUNCTION	0.376834	1	GRB7, CRB3, SRC, LAMA3, LAMB3, CX3CL1
HALLMARK_EPITHELIAL_MESENCHYMAL_TRANSITION	0.376834	1	SDC4, MCM7, LAMA3, AREG, SDC1, PVR
HALLMARK_PROTEIN_SECRETION	0.427171	1	TSPAN8, ICA1, KRT18
HALLMARK_APOPTOSIS	0.569694	1	IL1A, CLU, CDKN1A, KRT18
HALLMARK_HEDGEHOG_SIGNALING	0.595966	1	CELSR1
HALLMARK_COAGULATION	0.67051	1	HPN, CFI, CLU
HALLMARK_UV_RESPONSE_DN	0.698396	1	MET, NR1D2, ICA1
HALLMARK_REACTIVE_OXIGEN_SPECIES_PATHWAY	0.709046	1	PRDX1
HALLMARK_ESTROGEN_RESPONSE_LATE	0.736599	1	PTGES, SLC16A1, ST14, AREG
HALLMARK_MYOGENESIS	0.736599	1	HBEGF, CLU, CHRNB1, CDKN1A
HALLMARK_XENOBIOTIC_METABOLISM	0.736599	1	PTGES, RAP1GAP, PTGR1, SLC35D1
HALLMARK_MYC_TARGETS_V2	0.768283	1	LAS1L
HALLMARK_CHOLESTEROL_HOMEOSTASIS	0.845509	1	CLU
HALLMARK_HYPOXIA	0.878512	1	FAM162A, SDC4, CDKN1A
HALLMARK_INTERFERON_GAMMA_RESPONSE	0.878512	1	P2RY14, NUP93, CDKN1A
HALLMARK_COMPLEMENT	0.878512	1	GZMB, SRC, CLU
HALLMARK_E2F_TARGETS	0.878512	1	MCM7, RANBP1, CDKN1A
HALLMARK_KRAS_SIGNALING_UP	0.878512	1	HBEGF, TSPAN1, ADAMDEC1
HALLMARK_FATTY_ACID_METABOLISM	0.907451	1	GPD1, SUCLG2
HALLMARK_PEROXISOME	0.927928	1	PRDX1
HALLMARK_PI3K_AKT_MTOR_SIGNALING	0.92974	1	CDKN1A
HALLMARK_BILE_ACID_METABOLISM	0.941219	1	NR3C2
HALLMARK_MTORC1_SIGNALING	0.961689	1	PRDX1, CDKN1A
HALLMARK_MYC_TARGETS_V1	0.961689	1	MCM7, RANBP1
HALLMARK_OXIDATIVE_PHOSPHORYLATION	0.961689	1	ATP1B1, COX7B
HALLMARK_HEME_METABOLISM	0.961689	1	PIGQ, RAP1GAP
HALLMARK_DNA_REPAIR	0.977746	1	POLR1C
HALLMARK_MITOTIC_SPINDLE	0.993848	1	TRIO
HALLMARK_ADIPOGENESIS	0.993848	1	COX7B
HALLMARK_IL2_STAT5_SIGNALING	0.993848	1	CDCP1
HALLMARK_ALLOGRAFT_REJECTION	0.993848	1	GZMB
HALLMARK_WNT_BETA_CATENIN_SIGNALING	1	1
HALLMARK_TGF_BETA_SIGNALING	1	1
HALLMARK_IL6_JAK_STAT3_SIGNALING	1	1
HALLMARK_G2M_CHECKPOINT	1	1
HALLMARK_NOTCH_SIGNALING	1	1
HALLMARK_ANDROGEN_RESPONSE	1	1
HALLMARK_INTERFERON_ALPHA_RESPONSE	1	1
HALLMARK_UNFOLDED_PROTEIN_RESPONSE	1	1
HALLMARK_UV_RESPONSE_UP	1	1
HALLMARK_ANGIOGENESIS	1	1
HALLMARK_SPERMATOGENESIS	1	1
HALLMARK_KRAS_SIGNALING_DN	1	1
HALLMARK_PANCREAS_BETA_CELLS	1	1
