# Supplementary material for: Ilusiones en el Derecho natural burgués
Source: Oxford University Press journal article supplement (doi:10.1158/0008-5472.can-20-2870), 1993-01-01
Supplement: 00085472can202870-sup-249908_4_supp_6908378_q699f6.xlsx [file 00085472can202870-sup-249908_4_supp_6908378_q699f6.xlsx]

## Sheet: TableS4-DE_Ly6gpos_TAN.G1KOvsCT
Gene	EnsemblID	Description	LFC	FC	P-value	adjusted P-value
Twsg1	ENSMUSG00000024098	twisted gastrulation BMP signaling modulator 1	1.13788	2.20057	0.0177193	0.999844
Slc35d1	ENSMUSG00000028521	solute carrier family 35 (UDP-glucuronic acid/UDP-N-acetylgalactosamine dual transporter), member D1	1.00976	2.01358	0.010897	0.999844
Lgals3	ENSMUSG00000050335	lectin, galactose binding, soluble 3	-2.10569	-4.30403	0.011183	0.999844
Ifitm3	ENSMUSG00000025492	interferon induced transmembrane protein 3	-2.00858	-4.02385	0.000542198	0.999844
Ccl3	ENSMUSG00000000982	chemokine (C-C motif) ligand 3	-1.52794	-2.88375	0.0296321	0.999844
Il1f9	ENSMUSG00000044103	interleukin 1 family, member 9	-1.52082	-2.86953	0.0391648	0.999844
Upp1	ENSMUSG00000020407	uridine phosphorylase 1	-1.48292	-2.79513	0.0419945	0.999844
Ccl4	ENSMUSG00000018930	chemokine (C-C motif) ligand 4	-1.44593	-2.72439	0.0225668	0.999844
Cxcl2	ENSMUSG00000058427	chemokine (C-X-C motif) ligand 2	-1.41952	-2.67497	0.0168159	0.999844
Acod1	ENSMUSG00000022126	aconitate decarboxylase 1	-1.41212	-2.66128	0.0148386	0.999844
Mt1	ENSMUSG00000031765	metallothionein 1	-1.40557	-2.64922	0.0410202	0.999844
Cox8a	ENSMUSG00000035885	cytochrome c oxidase subunit 8A	-1.38477	-2.6113	0.0105456	0.999844
Egr3	ENSMUSG00000033730	early growth response 3	-1.34557	-2.54131	0.0485414	0.999844
Ifrd1	ENSMUSG00000001627	interferon-related developmental regulator 1	-1.26878	-2.40958	0.0304222	0.999844
Ugt1a7c	ENSMUSG00000090124	UDP glucuronosyltransferase 1 family, polypeptide A7C	-1.26418	-2.40191	0.0173966	0.999844
Slc7a11	ENSMUSG00000027737	solute carrier family 7 (cationic amino acid transporter, y+ system), member 11	-1.23669	-2.35658	0.0123166	0.999844
S100a8	ENSMUSG00000056054	S100 calcium binding protein A8 (calgranulin A)	-1.23379	-2.35183	0.0222107	0.999844
Rn7s2	ENSMUSG00000099250	7S RNA 2	-1.22797	-2.34236	0.00449152	0.999844
Snx20	ENSMUSG00000031662	sorting nexin 20	-1.20343	-2.30287	0.00057324	0.999844
Gadd45a	ENSMUSG00000036390	growth arrest and DNA-damage-inducible 45 alpha	-1.19535	-2.29	0.00469323	0.999844
Hmgn2	ENSMUSG00000003038	high mobility group nucleosomal binding domain 2	-1.17948	-2.26495	0.0127863	0.999844
Pithd1	ENSMUSG00000028669	PITH (C-terminal proteasome-interacting domain of thioredoxin-like) domain containing 1	-1.14935	-2.21814	0.00564923	0.999844
Slfn4	ENSMUSG00000000204	schlafen 4	-1.13058	-2.18947	0.0342062	0.999844
Atf3	ENSMUSG00000026628	activating transcription factor 3	-1.12252	-2.17726	0.0194144	0.999844
S100a9	ENSMUSG00000056071	S100 calcium binding protein A9 (calgranulin B)	-1.12146	-2.17567	0.00518036	0.999844
Ptgs2	ENSMUSG00000032487	prostaglandin-endoperoxide synthase 2	-1.09304	-2.13323	0.0457209	0.999844
Nfkbia	ENSMUSG00000021025	nuclear factor of kappa light polypeptide gene enhancer in B cells inhibitor, alpha	-1.09245	-2.13235	0.0224012	0.999844
Il1rn	ENSMUSG00000026981	interleukin 1 receptor antagonist	-1.09242	-2.13231	0.026358	0.999844
Mefv	ENSMUSG00000022534	Mediterranean fever	-1.09134	-2.13073	0.00173914	0.999844
Tyrobp	ENSMUSG00000030579	TYRO protein tyrosine kinase binding protein	-1.0904	-2.12934	0.0254438	0.999844
Hmox1	ENSMUSG00000005413	heme oxygenase 1	-1.08443	-2.12054	0.00392509	0.999844
Lmnb1	ENSMUSG00000024590	lamin B1	-1.08063	-2.11496	0.0115525	0.999844
Ubb	ENSMUSG00000019505	ubiquitin B	-1.05822	-2.08236	0.00226409	0.999844
Gadd45b	ENSMUSG00000015312	growth arrest and DNA-damage-inducible 45 beta	-1.0508	-2.07168	0.0137534	0.999844
Zc3h12a	ENSMUSG00000042677	zinc finger CCCH type containing 12A	-1.04783	-2.06742	0.0349415	0.999844
Akirin1	ENSMUSG00000023075	akirin 1	-1.04637	-2.06532	0.0367862	0.999844
Fth1	ENSMUSG00000024661	ferritin heavy polypeptide 1	-1.03956	-2.0556	0.0120034	0.999844
Cd53	ENSMUSG00000040747	CD53 antigen	-1.01958	-2.02733	0.0204838	0.999844
