# Supplementary material for: Ilusiones en el Derecho natural burgués
Source: Oxford University Press journal article supplement (doi:10.1158/0008-5472.can-20-2870), 1993-01-01
Supplement: 00085472can202870-sup-249908_4_supp_6908379_qg99fg.xlsx [file 00085472can202870-sup-249908_4_supp_6908379_qg99fg.xlsx]

## Sheet: TableS5-ORA_Hallmark_DE_TAN
GeneSet	P	FDR	GeneList
HALLMARK_TNFA_SIGNALING_VIA_NFKB	1.01467e-13	5.07337e-12	GADD45A, GADD45B, PLAUR, ATF3, NFKBIA, CCL4, ZFP36, KLF10, ZC3H12A, IER3, PTGS2, PLEK, EGR3, IL1A, TIPARP, NINJ1, PDE4B, TNF, PPP1R15A, EGR2, VEGFA, CEBPB, IER5, BTG1, TGIF1, CCRL2, CD44
HALLMARK_HYPOXIA	0.000258155	0.00430258	HMOX1, TPD52, PLAUR, ATF3, CITED2, ZFP36, IER3, TGM2, GLRX, TIPARP, PPP1R15A, VEGFA, CDKN1B, BTG1
HALLMARK_P53_PATHWAY	0.000258155	0.00430258	HMOX1, GADD45A, SLC7A11, ATF3, IER3, UPP1, IL1A, NINJ1, GM2A, PPP1R15A, IER5, BTG1, PCNA, SLC3A2
HALLMARK_APOPTOSIS	0.000405494	0.00506867	HMOX1, GADD45A, LGALS3, GADD45B, ATF3, IER3, EGR3, IL1A, TNF, CDKN1B, CD44, PPT1
HALLMARK_INFLAMMATORY_RESPONSE	0.00268251	0.0268251	MEFV, PLAUR, NFKBIA, SEMA4D, IL1A, PDE4B, RGS1, TNFRSF1B, PTAFR, OSM, CCRL2, RHOG
HALLMARK_IL6_JAK_STAT3_SIGNALING	0.0166257	0.138547	HMOX1, CCR1, CD9, TNF, TNFRSF1B, CD44
HALLMARK_MTORC1_SIGNALING	0.0198664	0.141903	SLC7A11, ATP6V1D, IFRD1, CD9, GLRX, SERP1, PPP1R15A, GLA, DAPP1, FGL2
HALLMARK_REACTIVE_OXIGEN_SPECIES_PATHWAY	0.0279171	0.167745	TXN, GLRX, ATOX1, NDUFA6
HALLMARK_CHOLESTEROL_HOMEOSTASIS	0.0301941	0.167745	LGALS3, PLAUR, ATF3, CD9, S100A11
HALLMARK_INTERFERON_GAMMA_RESPONSE	0.047033	0.213787	IFITM2, B2M, NFKBIA, UPP1, PTGS2, ARID5B, PDE4B, BTG1, FGL2
HALLMARK_COMPLEMENT	0.047033	0.213787	S100A9, LGALS3, PLAUR, PFN1, PLEK, ATOX1, FCER1G, CEBPB, RHOG
HALLMARK_ANDROGEN_RESPONSE	0.0902463	0.376026	B2M, TPD52, ARID5B, TMEM50A, ELL2
HALLMARK_UNFOLDED_PROTEIN_RESPONSE	0.128593	0.480754	ATF3, SERP1, EIF4EBP1, VEGFA, CEBPB
HALLMARK_TGF_BETA_SIGNALING	0.134611	0.480754	KLF10, PPP1R15A, TGIF1
HALLMARK_PROTEIN_SECRETION	0.191216	0.570609	TPD52, SNAP23, GLA, PPT1
HALLMARK_GLYCOLYSIS	0.194007	0.570609	TXN, CITED2, IER3, GLRX, TALDO1, VEGFA, CD44
HALLMARK_ALLOGRAFT_REJECTION	0.194007	0.570609	CCR1, SRGN, B2M, TPD52, CCL4, TNF, IGSF6
HALLMARK_UV_RESPONSE_UP	0.31755	0.69634	HMOX1, ATF3, NFKBIA, BTG1, PPT1
HALLMARK_ESTROGEN_RESPONSE_EARLY	0.334243	0.69634	KLF10, TGM2, EGR3, TIPARP, GLA, CD44
HALLMARK_ESTROGEN_RESPONSE_LATE	0.334243	0.69634	S100A9, ZFP36, CD9, EGR3, GLA, CD44
HALLMARK_EPITHELIAL_MESENCHYMAL_TRANSITION	0.334243	0.69634	GADD45A, GADD45B, PLAUR, TGM2, VEGFA, CD44
HALLMARK_OXIDATIVE_PHOSPHORYLATION	0.334243	0.69634	COX8A, ATP6V1D, ATP6V1E1, COX5B, ATP6V1G1, NDUFA6
HALLMARK_IL2_STAT5_SIGNALING	0.334243	0.69634	GADD45B, TGM2, NFKBIZ, TNFRSF1B, CD44, FGL2
HALLMARK_KRAS_SIGNALING_UP	0.334243	0.69634	PLAUR, PTGS2, GLRX, PPP1R15A, TNFRSF1B, FCER1G
HALLMARK_INTERFERON_ALPHA_RESPONSE	0.402853	0.805705	IFITM2, B2M, CCRL2
HALLMARK_PI3K_AKT_MTOR_SIGNALING	0.453233	0.871602	PFN1, DAPP1, CDKN1B
HALLMARK_DNA_REPAIR	0.474962	0.879559	VPS37B, PDE4B, PCNA, SDCBP
HALLMARK_NOTCH_SIGNALING	0.535282	0.955861	SKP1
HALLMARK_HEDGEHOG_SIGNALING	0.57783	0.96305	VEGFA
HALLMARK_ANGIOGENESIS	0.57783	0.96305	VEGFA
HALLMARK_WNT_BETA_CATENIN_SIGNALING	0.634495	1	DVL2
HALLMARK_APICAL_SURFACE	0.651649	1	PLAUR
HALLMARK_ADIPOGENESIS	0.700705	1	GADD45A, COX8A, TALDO1, UBC
HALLMARK_E2F_TARGETS	0.700705	1	LMNB1, TRA2B, CDKN1B, PCNA
HALLMARK_COAGULATION	0.842248	1	CD9, PLEK
HALLMARK_G2M_CHECKPOINT	0.856756	1	LMNB1, TRA2B, CDKN1B
HALLMARK_MYC_TARGETS_V1	0.856756	1	IFRD1, TRA2B, PCNA
HALLMARK_XENOBIOTIC_METABOLISM	0.856756	1	HMOX1, UPP1, NINJ1
HALLMARK_HEME_METABOLISM	0.856756	1	SLC7A11, ELL2, SDCBP
HALLMARK_UV_RESPONSE_DN	0.859024	1	CITED2, CDKN1B
HALLMARK_MYOGENESIS	0.952989	1	GADD45B, IFRD1
HALLMARK_APICAL_JUNCTION	0.952989	1	PFN1, CAP1
HALLMARK_SPERMATOGENESIS	0.961437	1	TALDO1
HALLMARK_MITOTIC_SPINDLE	0.992127	1	LMNB1
HALLMARK_KRAS_SIGNALING_DN	0.992127	1	MEFV
HALLMARK_MYC_TARGETS_V2	1	1
HALLMARK_FATTY_ACID_METABOLISM	1	1
HALLMARK_BILE_ACID_METABOLISM	1	1
HALLMARK_PEROXISOME	1	1
HALLMARK_PANCREAS_BETA_CELLS	1	1
