# Supplementary material for: Ilusiones en el Derecho natural burgués
Source: Oxford University Press journal article supplement (doi:10.1158/0008-5472.can-20-2870), 1993-01-01
Supplement: 00085472can202870-sup-249908_4_supp_6908380_qh99fh.xlsx [file 00085472can202870-sup-249908_4_supp_6908380_qh99fh.xlsx]

## Sheet: TableS6-DE_CD45neg
Gene	EnsemblID	Description	LFC	FC	P-value	adjusted P-value
Zfp125	ENSMUSG00000069755	zinc finger protein 125	6.87879	117.686	1.89697e-12	2.09597e-08
Myh6	ENSMUSG00000040752	myosin, heavy polypeptide 6, cardiac muscle, alpha	5.57747	47.7514	1.87898e-06	0.00692027
Rps13-ps2	ENSMUSG00000069972	ribosomal protein S13, pseudogene 2	5.29597	39.2866	0.000197895	0.0587784
Ltf	ENSMUSG00000032496	lactotransferrin	3.39879	10.5472	0.0244486	0.197559
Rec8	ENSMUSG00000002324	REC8 meiotic recombination protein	3.35107	10.204	0.00178049	0.0961914
Gabrp	ENSMUSG00000020159	gamma-aminobutyric acid (GABA) A receptor, pi	3.30747	9.9003	0.0100011	0.144507
Rnase2a	ENSMUSG00000047222	ribonuclease, RNase A family, 2A (liver, eosinophil-derived neurotoxin)	2.53513	5.79631	0.0159121	0.167578
Tnip3	ENSMUSG00000044162	TNFAIP3 interacting protein 3	2.4966	5.64354	0.00168094	0.0955347
Ccl20	ENSMUSG00000026166	chemokine (C-C motif) ligand 20	2.36312	5.14481	0.00478435	0.126436
Mmp9	ENSMUSG00000017737	matrix metallopeptidase 9	2.32834	5.02227	0.00268776	0.106286
Tns4	ENSMUSG00000017607	tensin 4	2.32445	5.00873	0.00293222	0.108611
Cxcl1	ENSMUSG00000029380	chemokine (C-X-C motif) ligand 1	2.31259	4.96773	0.000565088	0.0777608
Fpr2	ENSMUSG00000052270	formyl peptide receptor 2	2.29821	4.91846	0.00310122	0.11089
Tmem212	ENSMUSG00000043164	transmembrane protein 212	2.28291	4.86659	0.0143795	0.159838
Cxcl5	ENSMUSG00000029371	chemokine (C-X-C motif) ligand 5	2.27778	4.8493	0.00131589	0.0932986
Ccl9	ENSMUSG00000019122	chemokine (C-C motif) ligand 9	2.2323	4.69883	0.00190253	0.0961914
Tnf	ENSMUSG00000024401	tumor necrosis factor	2.22846	4.68632	8.83262e-05	0.0454622
Cwh43	ENSMUSG00000029154	cell wall biogenesis 43 C-terminal homolog	2.15392	4.45035	0.00512581	0.126436
AU040972	ENSMUSG00000091523	expressed sequence AU040972	2.1365	4.39693	0.0319905	0.221642
Odaph	ENSMUSG00000096035	odontogenesis associated phosphoprotein	2.10848	4.31237	0.00500321	0.126436
Ccl17	ENSMUSG00000031780	chemokine (C-C motif) ligand 17	2.10061	4.28891	0.00698123	0.128989
Il1a	ENSMUSG00000027399	interleukin 1 alpha	2.08101	4.23103	0.00623402	0.127949
Igha	ENSMUSG00000095079	immunoglobulin heavy constant alpha	2.06957	4.19763	0.0359743	0.233263
Clec4d	ENSMUSG00000030144	C-type lectin domain family 4, member d	2.03917	4.11008	0.0056495	0.127297
Anxa8	ENSMUSG00000021950	annexin A8	2.01207	4.03362	0.00683778	0.128706
Ifitm1	ENSMUSG00000025491	interferon induced transmembrane protein 1	1.98739	3.96519	0.00266222	0.105809
Wfdc17	ENSMUSG00000069792	WAP four-disulfide core domain 17	1.9802	3.94549	6.16077e-05	0.0400414
Mmp10	ENSMUSG00000047562	matrix metallopeptidase 10	1.94483	3.84992	0.0353843	0.232315
Aldh1a3	ENSMUSG00000015134	aldehyde dehydrogenase family 1, subfamily A3	1.93287	3.81813	0.0256809	0.201669
S100a9	ENSMUSG00000056071	S100 calcium binding protein A9 (calgranulin B)	1.8973	3.72516	0.00275292	0.106353
S100a8	ENSMUSG00000056054	S100 calcium binding protein A8 (calgranulin A)	1.89531	3.72003	0.00250171	0.103526
Adam8	ENSMUSG00000025473	a disintegrin and metallopeptidase domain 8	1.8769	3.67285	0.00051818	0.0777608
Mcpt2	ENSMUSG00000022226	mast cell protease 2	1.8642	3.64065	0.00743965	0.131286
Spp1	ENSMUSG00000029304	secreted phosphoprotein 1	1.82955	3.55425	0.0159083	0.167578
Csf3r	ENSMUSG00000028859	colony stimulating factor 3 receptor (granulocyte)	1.81545	3.5197	0.00402733	0.121695
Wfdc21	ENSMUSG00000051748	WAP four-disulfide core domain 21	1.7896	3.45718	0.000869839	0.0835727
Cxcl3	ENSMUSG00000029379	chemokine (C-X-C motif) ligand 3	1.78105	3.43675	0.0178888	0.173532
Mmp12	ENSMUSG00000049723	matrix metallopeptidase 12	1.77344	3.41869	0.00657124	0.127949
Acsbg1	ENSMUSG00000032281	acyl-CoA synthetase bubblegum family member 1	1.70561	3.26167	0.0376494	0.237036
Il1r2	ENSMUSG00000026073	interleukin 1 receptor, type II	1.70412	3.2583	0.021722	0.188521
Cd59a	ENSMUSG00000032679	CD59a antigen	1.68798	3.22205	0.0314509	0.221197
Sprr2a3	ENSMUSG00000074445	small proline-rich protein 2A3	1.64449	3.12638	0.0403243	0.241555
Il1b	ENSMUSG00000027398	interleukin 1 beta	1.6321	3.09964	0.00791873	0.13311
Clec2f	ENSMUSG00000089728	C-type lectin domain family 2, member f	1.62544	3.08537	0.00883268	0.138415
Emilin2	ENSMUSG00000024053	elastin microfibril interfacer 2	1.61767	3.06879	0.00203745	0.0972518
AA467197	ENSMUSG00000033213	expressed sequence AA467197	1.59258	3.01589	0.00486641	0.126436
Wincr1	ENSMUSG00000085183	WNT induced non-coding RNA 1	1.57986	2.9894	0.0246249	0.197559
Mcpt1	ENSMUSG00000022227	mast cell protease 1	1.55692	2.94226	0.0387628	0.239761
Fgfbp1	ENSMUSG00000048373	fibroblast growth factor binding protein 1	1.52205	2.87199	0.0464755	0.256626
Slc4a11	ENSMUSG00000074796	solute carrier family 4, sodium bicarbonate transporter-like, member 11	1.50794	2.84403	0.0125089	0.153914
Clec4n	ENSMUSG00000023349	C-type lectin domain family 4, member n	1.50131	2.83099	0.00568865	0.127297
Msln	ENSMUSG00000063011	mesothelin	1.49569	2.81998	0.040788	0.24334
Marco	ENSMUSG00000026390	macrophage receptor with collagenous structure	1.49183	2.81246	0.00510673	0.126436
Msr1	ENSMUSG00000025044	macrophage scavenger receptor 1	1.4877	2.80441	0.0110462	0.147759
Pilrb1	ENSMUSG00000066684	paired immunoglobin-like type 2 receptor beta 1	1.48716	2.80337	0.0278316	0.208624
Car5b	ENSMUSG00000031373	carbonic anhydrase 5b, mitochondrial	1.47953	2.78858	0.0332037	0.225626
Adamdec1	ENSMUSG00000022057	ADAM-like, decysin 1	1.47567	2.78113	0.0147521	0.16186
Il1rn	ENSMUSG00000026981	interleukin 1 receptor antagonist	1.46871	2.76774	0.0397202	0.241551
Acp5	ENSMUSG00000001348	acid phosphatase 5, tartrate resistant	1.4649	2.76045	0.0010321	0.0863913
Pld4	ENSMUSG00000052160	phospholipase D family, member 4	1.4645	2.75968	0.00384051	0.120391
Tigit	ENSMUSG00000071552	T cell immunoreceptor with Ig and ITIM domains	1.46194	2.75478	0.0186579	0.178011
Nbl1	ENSMUSG00000041120	NBL1, DAN family BMP antagonist	1.45816	2.74758	0.0260932	0.202888
Igkc	ENSMUSG00000076609	immunoglobulin kappa constant	1.45628	2.74399	0.039437	0.241012
Ly86	ENSMUSG00000021423	lymphocyte antigen 86	1.45601	2.74349	0.00390269	0.120391
Clec5a	ENSMUSG00000029915	C-type lectin domain family 5, member a	1.45201	2.73588	0.00771256	0.132285
Clu	ENSMUSG00000022037	clusterin	1.44464	2.72195	0.000143709	0.048396
Pilra	ENSMUSG00000046245	paired immunoglobin-like type 2 receptor alpha	1.4432	2.71923	0.00442073	0.123618
Padi2	ENSMUSG00000028927	peptidyl arginine deiminase, type II	1.43266	2.69944	0.0133728	0.156805
S100a4	ENSMUSG00000001020	S100 calcium binding protein A4	1.42362	2.68257	0.00188554	0.0961914
Camk2b	ENSMUSG00000057897	calcium/calmodulin-dependent protein kinase II, beta	1.42283	2.6811	0.000139311	0.048396
Sgms2	ENSMUSG00000050931	sphingomyelin synthase 2	1.41433	2.66535	0.0104379	0.146135
Wnt7b	ENSMUSG00000022382	wingless-type MMTV integration site family, member 7B	1.40529	2.64872	0.0350522	0.231773
Fgr	ENSMUSG00000028874	FGR proto-oncogene, Src family tyrosine kinase	1.40089	2.64065	0.00292126	0.108611
F10	ENSMUSG00000031444	coagulation factor X	1.3949	2.6297	0.00419207	0.122535
Zfp951	ENSMUSG00000072774	zinc finger protein 951	1.38519	2.61207	0.00893011	0.13897
Atp2c2	ENSMUSG00000034112	ATPase, Ca++ transporting, type 2C, member 2	1.38139	2.60518	0.0387864	0.239761
Lnx1	ENSMUSG00000029228	ligand of numb-protein X 1	1.37808	2.59922	0.00453626	0.125234
Pdlim4	ENSMUSG00000020388	PDZ and LIM domain 4	1.37436	2.59252	0.0147665	0.16186
Krt79	ENSMUSG00000061397	keratin 79	1.34943	2.54811	0.0321276	0.221913
Ramp1	ENSMUSG00000034353	receptor (calcitonin) activity modifying protein 1	1.34852	2.54651	0.000473817	0.0777608
Cd53	ENSMUSG00000040747	CD53 antigen	1.32774	2.51009	0.0221667	0.189713
Clec4a2	ENSMUSG00000030148	C-type lectin domain family 4, member a2	1.32346	2.50265	0.00364386	0.118764
Dock11	ENSMUSG00000031093	dedicator of cytokinesis 11	1.30922	2.47808	0.0485795	0.260814
Hba-a1	ENSMUSG00000069919	hemoglobin alpha, adult chain 1	1.30511	2.47102	0.00390146	0.120391
Nfkbie	ENSMUSG00000023947	nuclear factor of kappa light polypeptide gene enhancer in B cells inhibitor, epsilon	1.29657	2.45644	0.00193738	0.0961914
Hba-a2	ENSMUSG00000069917	hemoglobin alpha, adult chain 2	1.29431	2.4526	0.00513303	0.126436
Hbb-bt	ENSMUSG00000073940	hemoglobin, beta adult t chain	1.2943	2.45259	0.00940116	0.142399
Trem1	ENSMUSG00000042265	triggering receptor expressed on myeloid cells 1	1.28869	2.44306	0.0258111	0.202079
Ncf4	ENSMUSG00000071715	neutrophil cytosolic factor 4	1.28762	2.44124	0.00796598	0.13311
Irf5	ENSMUSG00000029771	interferon regulatory factor 5	1.2808	2.42974	0.0117014	0.150583
Ass1	ENSMUSG00000076441	argininosuccinate synthetase 1	1.2774	2.42402	0.00582665	0.127373
Gzma	ENSMUSG00000023132	granzyme A	1.27433	2.41887	0.032127	0.221913
Cfp	ENSMUSG00000001128	complement factor properdin	1.25772	2.39118	0.00849491	0.136227
Coro1a	ENSMUSG00000030707	coronin, actin binding protein 1A	1.25672	2.38951	0.0058963	0.127373
Tfec	ENSMUSG00000029553	transcription factor EC	1.25003	2.37846	0.00947266	0.142399
Prss22	ENSMUSG00000045027	protease, serine 22	1.24911	2.37695	0.0059369	0.127373
Cd52	ENSMUSG00000000682	CD52 antigen	1.24719	2.37378	0.0186475	0.178011
Ccr1	ENSMUSG00000025804	chemokine (C-C motif) receptor 1	1.233	2.35055	0.00973217	0.143037
Tbxas1	ENSMUSG00000029925	thromboxane A synthase 1, platelet	1.22876	2.34365	0.00151535	0.0942566
Ppm1j	ENSMUSG00000002228	protein phosphatase 1J	1.22692	2.34067	0.00390224	0.120391
Cd200r1	ENSMUSG00000022667	CD200 receptor 1	1.21954	2.32873	0.00711681	0.12971
Hbb-bs	ENSMUSG00000052305	hemoglobin, beta adult s chain	1.20074	2.29858	0.00974814	0.143037
Lgals3	ENSMUSG00000050335	lectin, galactose binding, soluble 3	1.19637	2.29163	0.00152809	0.0943233
Bst1	ENSMUSG00000029082	bone marrow stromal cell antigen 1	1.1957	2.29056	0.0287274	0.211007
Ccl6	ENSMUSG00000018927	chemokine (C-C motif) ligand 6	1.19501	2.28947	0.0066922	0.127949
Spire2	ENSMUSG00000010154	spire type actin nucleation factor 2	1.18811	2.27854	0.00457312	0.125381
Ccl3	ENSMUSG00000000982	chemokine (C-C motif) ligand 3	1.18657	2.27611	0.0136651	0.157606
Tyrobp	ENSMUSG00000030579	TYRO protein tyrosine kinase binding protein	1.18559	2.27456	0.00483169	0.126436
AI662270	ENSMUSG00000087107	expressed sequence AI662270	1.18509	2.27378	0.0104343	0.146135
Ncf2	ENSMUSG00000026480	neutrophil cytosolic factor 2	1.1847	2.27316	0.00738962	0.131286
Ccr5	ENSMUSG00000079227	chemokine (C-C motif) receptor 5	1.18281	2.27019	0.0153228	0.165012
Cxcl2	ENSMUSG00000058427	chemokine (C-X-C motif) ligand 2	1.18128	2.26778	0.0333892	0.226136
Alox5ap	ENSMUSG00000060063	arachidonate 5-lipoxygenase activating protein	1.18045	2.26648	0.0095148	0.142838
C1qc	ENSMUSG00000036896	complement component 1, q subcomponent, C chain	1.18043	2.26645	0.00912008	0.140692
Slfn2	ENSMUSG00000072620	schlafen 2	1.17553	2.25876	0.0118577	0.150878
Ccl4	ENSMUSG00000018930	chemokine (C-C motif) ligand 4	1.17481	2.25763	0.0160629	0.167753
Fcer1g	ENSMUSG00000058715	Fc receptor, IgE, high affinity I, gamma polypeptide	1.17358	2.2557	0.00646692	0.127949
Rac2	ENSMUSG00000033220	Rac family small GTPase 2	1.17103	2.25172	0.00192936	0.0961914
Selplg	ENSMUSG00000048163	selectin, platelet (p-selectin) ligand	1.1655	2.24311	0.00525243	0.126436
Dok2	ENSMUSG00000022102	docking protein 2	1.16417	2.24104	0.00416001	0.122535
Tnfrsf11b	ENSMUSG00000063727	tumor necrosis factor receptor superfamily, member 11b (osteoprotegerin)	1.16118	2.2364	0.037346	0.236837
Spi1	ENSMUSG00000002111	spleen focus forming virus (SFFV) proviral integration oncogene	1.16037	2.23515	0.00594716	0.127373
H2-M2	ENSMUSG00000016283	histocompatibility 2, M region locus 2	1.16019	2.23487	0.028403	0.210311
Itgam	ENSMUSG00000030786	integrin alpha M	1.1545	2.22607	0.0262571	0.203662
Fpr1	ENSMUSG00000045551	formyl peptide receptor 1	1.15147	2.22139	0.0464206	0.256527
C1qa	ENSMUSG00000036887	complement component 1, q subcomponent, alpha polypeptide	1.14868	2.21711	0.0145586	0.160997
C1qb	ENSMUSG00000036905	complement component 1, q subcomponent, beta polypeptide	1.14271	2.20795	0.0115712	0.150583
Apobr	ENSMUSG00000042759	apolipoprotein B receptor	1.14177	2.20652	0.0420832	0.24576
Sdf2l1	ENSMUSG00000022769	stromal cell-derived factor 2-like 1	1.13316	2.19339	0.00115831	0.0927402
Capg	ENSMUSG00000056737	capping protein (actin filament), gelsolin-like	1.12794	2.18546	0.0126825	0.153914
Rhof	ENSMUSG00000029449	ras homolog family member F (in filopodia)	1.12687	2.18384	0.0193758	0.181426
Ctss	ENSMUSG00000038642	cathepsin S	1.12653	2.18333	0.00826721	0.135054
Snca	ENSMUSG00000025889	synuclein, alpha	1.12522	2.18135	0.0270426	0.205891
Acp1	ENSMUSG00000044573	acid phosphatase 1, soluble	1.12435	2.18004	1.73691e-05	0.0213234
Gpa33	ENSMUSG00000000544	glycoprotein A33 (transmembrane)	1.1205	2.17423	0.0221261	0.189713
Ltc4s	ENSMUSG00000020377	leukotriene C4 synthase	1.11749	2.16969	0.0233142	0.192506
Comtd1	ENSMUSG00000021773	catechol-O-methyltransferase domain containing 1	1.11622	2.16778	0.000559306	0.0777608
Lpl	ENSMUSG00000015568	lipoprotein lipase	1.11104	2.16001	0.00705937	0.12971
Itgb2	ENSMUSG00000000290	integrin beta 2	1.10842	2.1561	0.00877508	0.138114
Cxcl16	ENSMUSG00000018920	chemokine (C-X-C motif) ligand 16	1.10718	2.15424	0.000254536	0.0639932
Fmnl1	ENSMUSG00000055805	formin-like 1	1.09863	2.14151	0.0026169	0.105526
Btk	ENSMUSG00000031264	Bruton agammaglobulinemia tyrosine kinase	1.09813	2.14078	0.0134325	0.156805
Cda	ENSMUSG00000028755	cytidine deaminase	1.0964	2.13821	0.0168487	0.170626
Coro2a	ENSMUSG00000028337	coronin, actin binding protein 2A	1.09506	2.13623	0.0190413	0.179851
Acap1	ENSMUSG00000001588	ArfGAP with coiled-coil, ankyrin repeat and PH domains 1	1.09317	2.13342	0.00533743	0.127097
Ptk2b	ENSMUSG00000059456	PTK2 protein tyrosine kinase 2 beta	1.08931	2.12773	0.0018913	0.0961914
Tenm4	ENSMUSG00000048078	teneurin transmembrane protein 4	1.08326	2.11882	0.0430817	0.248766
Cd48	ENSMUSG00000015355	CD48 antigen	1.08257	2.11781	0.00802986	0.13311
Alpk1	ENSMUSG00000028028	alpha-kinase 1	1.07641	2.10879	0.00286878	0.108258
Adap1	ENSMUSG00000056413	ArfGAP with dual PH domains 1	1.07625	2.10855	0.00545404	0.127159
Clec4a3	ENSMUSG00000043832	C-type lectin domain family 4, member a3	1.07241	2.10295	0.00710755	0.12971
Vav1	ENSMUSG00000034116	vav 1 oncogene	1.0712	2.10117	0.00797773	0.13311
Cyth4	ENSMUSG00000018008	cytohesin 4	1.07031	2.09989	0.00395198	0.120623
Cyp4f18	ENSMUSG00000003484	cytochrome P450, family 4, subfamily f, polypeptide 18	1.06619	2.0939	0.0259605	0.202325
Ikbke	ENSMUSG00000042349	inhibitor of kappaB kinase epsilon	1.05901	2.08351	0.000588315	0.0777608
Fermt3	ENSMUSG00000024965	fermitin family member 3	1.05794	2.08196	0.0129155	0.154233
Srgn	ENSMUSG00000020077	serglycin	1.05675	2.08024	0.0205939	0.184632
Galnt12	ENSMUSG00000039774	polypeptide N-acetylgalactosaminyltransferase 12	1.05531	2.07816	0.035291	0.232101
Tnfaip2	ENSMUSG00000021281	tumor necrosis factor, alpha-induced protein 2	1.05318	2.0751	0.0378129	0.237383
Fcgr2b	ENSMUSG00000026656	Fc receptor, IgG, low affinity IIb	1.048	2.06766	0.0224013	0.189738
Ear2	ENSMUSG00000072596	eosinophil-associated, ribonuclease A family, member 2	1.04592	2.06469	0.0209705	0.184934
Gngt2	ENSMUSG00000038811	guanine nucleotide binding protein (G protein), gamma transducing activity polypeptide 2	1.04386	2.06173	0.00938598	0.142399
Arhgap9	ENSMUSG00000040345	Rho GTPase activating protein 9	1.04256	2.05989	0.0202523	0.184304
Ctse	ENSMUSG00000004552	cathepsin E	1.03418	2.04795	0.024615	0.197559
Wnt7a	ENSMUSG00000030093	wingless-type MMTV integration site family, member 7A	1.03323	2.0466	0.0296298	0.214534
F2rl1	ENSMUSG00000021678	coagulation factor II (thrombin) receptor-like 1	1.03144	2.04407	0.0020356	0.0972518
Pstpip1	ENSMUSG00000032322	proline-serine-threonine phosphatase-interacting protein 1	1.02608	2.03648	0.0139745	0.158979
Ccr2	ENSMUSG00000049103	chemokine (C-C motif) receptor 2	1.02413	2.03373	0.0142498	0.159728
Klra2	ENSMUSG00000030187	killer cell lectin-like receptor, subfamily A, member 2	1.02374	2.03319	0.0269092	0.205691
Aif1	ENSMUSG00000024397	allograft inflammatory factor 1	1.02037	2.02844	0.0316556	0.221621
Fcgr3	ENSMUSG00000059498	Fc receptor, IgG, low affinity III	1.01127	2.01568	0.0190275	0.179851
Sla	ENSMUSG00000022372	src-like adaptor	1.0032	2.00444	0.0180103	0.174405
Olfm1	ENSMUSG00000026833	olfactomedin 1	1.00279	2.00387	0.0160836	0.167753
Fcgr4	ENSMUSG00000059089	Fc receptor, IgG, low affinity IV	1.00178	2.00247	0.0403316	0.241555
Lama4	ENSMUSG00000019846	laminin, alpha 4	-1.00416	-2.00577	0.0201553	0.183894
Arhgap6	ENSMUSG00000031355	Rho GTPase activating protein 6	-1.00866	-2.01204	0.0175678	0.171928
Hspa2	ENSMUSG00000059970	heat shock protein 2	-1.00951	-2.01323	0.00884221	0.138415
Vwa1	ENSMUSG00000042116	von Willebrand factor A domain containing 1	-1.01127	-2.01568	0.00728432	0.130933
Zfp874a	ENSMUSG00000069206	zinc finger protein 874a	-1.01262	-2.01757	6.13361e-05	0.0400414
Fam102b	ENSMUSG00000040339	family with sequence similarity 102, member B	-1.01602	-2.02234	0.00118367	0.0932986
Sp4	ENSMUSG00000025323	trans-acting transcription factor 4	-1.01659	-2.02313	0.000631589	0.0805441
Srcap	ENSMUSG00000053877	Snf2-related CREBBP activator protein	-1.0207	-2.0289	0.00765735	0.132129
Ncoa1	ENSMUSG00000020647	nuclear receptor coactivator 1	-1.02618	-2.03663	0.00570294	0.127297
Sema4f	ENSMUSG00000000627	sema domain, immunoglobulin domain (Ig), TM domain, and short cytoplasmic domain	-1.02807	-2.03929	0.0380441	0.238164
Cers6	ENSMUSG00000027035	ceramide synthase 6	-1.03265	-2.04577	0.0364619	0.235182
Cry2	ENSMUSG00000068742	cryptochrome 2 (photolyase-like)	-1.0342	-2.04798	0.00389394	0.120391
Col6a3	ENSMUSG00000048126	collagen, type VI, alpha 3	-1.03915	-2.05502	0.0212849	0.186329
Col18a1	ENSMUSG00000001435	collagen, type XVIII, alpha 1	-1.0487	-2.06867	0.0265325	0.204149
Soga1	ENSMUSG00000055485	suppressor of glucose, autophagy associated 1	-1.04914	-2.0693	0.0123171	0.153257
Hopx	ENSMUSG00000059325	HOP homeobox	-1.05053	-2.0713	0.0267401	0.205077
Szt2	ENSMUSG00000033253	seizure threshold 2	-1.05162	-2.07286	0.0462675	0.256462
Itpr2	ENSMUSG00000030287	inositol 1,4,5-triphosphate receptor 2	-1.07011	-2.0996	0.00309011	0.11089
Amer1	ENSMUSG00000050332	APC membrane recruitment 1	-1.07395	-2.10518	0.00183409	0.0961914
Ston2	ENSMUSG00000020961	stonin 2	-1.08257	-2.11781	0.00500118	0.126436
Lrp4	ENSMUSG00000027253	low density lipoprotein receptor-related protein 4	-1.08373	-2.1195	0.000992913	0.0845261
Antxr1	ENSMUSG00000033420	anthrax toxin receptor 1	-1.08657	-2.12369	0.00672322	0.127949
Cyp4f40	ENSMUSG00000090700	cytochrome P450, family 4, subfamily f, polypeptide 40	-1.08825	-2.12616	0.0375278	0.236837
Prss23	ENSMUSG00000039405	protease, serine 23	-1.09171	-2.13127	0.00375885	0.119655
Phka2	ENSMUSG00000031295	phosphorylase kinase alpha 2	-1.09243	-2.13233	0.0311729	0.220182
Exph5	ENSMUSG00000034584	exophilin 5	-1.09505	-2.13621	0.0044305	0.123618
Fbln5	ENSMUSG00000021186	fibulin 5	-1.10436	-2.15003	0.0100106	0.144507
Mfap3l	ENSMUSG00000031647	microfibrillar-associated protein 3-like	-1.10544	-2.15165	0.0226364	0.190487
Sytl5	ENSMUSG00000054453	synaptotagmin-like 5	-1.1086	-2.15636	0.00471718	0.126436
Klk14	ENSMUSG00000044737	kallikrein related-peptidase 14	-1.11197	-2.16141	0.0117752	0.150583
Zfp239	ENSMUSG00000042097	zinc finger protein 239	-1.11678	-2.16862	0.0191018	0.179851
Frmd6	ENSMUSG00000048285	FERM domain containing 6	-1.11771	-2.17002	0.00517224	0.126436
Bmx	ENSMUSG00000031377	BMX non-receptor tyrosine kinase	-1.12336	-2.17854	0.0273529	0.20686
Zfp871	ENSMUSG00000024298	zinc finger protein 871	-1.13004	-2.18865	0.000433034	0.0777608
Naip6	ENSMUSG00000078942	NLR family, apoptosis inhibitory protein 6	-1.1309	-2.18995	0.00563149	0.127297
Airn	ENSMUSG00000078247	antisense Igf2r RNA	-1.13091	-2.18997	0.0026576	0.105809
Rbms3	ENSMUSG00000039607	RNA binding motif, single stranded interacting protein	-1.13193	-2.19151	0.0414733	0.244851
Zfp273	ENSMUSG00000030446	zinc finger protein 273	-1.14016	-2.20406	7.97626e-05	0.0454622
Hpgds	ENSMUSG00000029919	hematopoietic prostaglandin D synthase	-1.15077	-2.22032	0.0209681	0.184934
Cald1	ENSMUSG00000029761	caldesmon 1	-1.16248	-2.23842	0.00499618	0.126436
St3gal6	ENSMUSG00000022747	ST3 beta-galactoside alpha-2,3-sialyltransferase 6	-1.16353	-2.24005	0.00910343	0.140692
Gnb4	ENSMUSG00000027669	guanine nucleotide binding protein (G protein), beta 4	-1.16851	-2.24779	0.0120889	0.151612
Utp14b	ENSMUSG00000079470	UTP14B small subunit processome component	-1.17683	-2.2608	0.00504171	0.126436
Tspan12	ENSMUSG00000029669	tetraspanin 12	-1.1802	-2.26608	0.0230969	0.192247
Ccdc189	ENSMUSG00000057176	coiled-coil domain containing 189	-1.18921	-2.28028	0.000704103	0.0817236
Gimap8	ENSMUSG00000064262	GTPase, IMAP family member 8	-1.19371	-2.2874	0.0172354	0.171408
Dlg4	ENSMUSG00000020886	discs large MAGUK scaffold protein 4	-1.19773	-2.29379	0.0399474	0.241555
Shroom4	ENSMUSG00000068270	shroom family member 4	-1.19985	-2.29715	0.00115296	0.0927402
Col16a1	ENSMUSG00000040690	collagen, type XVI, alpha 1	-1.2122	-2.3169	0.00150835	0.0942566
Syne4	ENSMUSG00000019737	spectrin repeat containing, nuclear envelope family member 4	-1.21465	-2.32084	0.0155674	0.165707
Adamts9	ENSMUSG00000030022	a disintegrin-like and metallopeptidase (reprolysin type) with thrombospondin type 1 motif, 9	-1.22749	-2.3416	0.00200054	0.0969473
Zfp772	ENSMUSG00000066838	zinc finger protein 772	-1.23675	-2.35667	0.00010695	0.0472677
Thrb	ENSMUSG00000021779	thyroid hormone receptor beta	-1.24034	-2.36255	0.00139263	0.0942566
Wdfy1	ENSMUSG00000073643	WD repeat and FYVE domain containing 1	-1.24339	-2.36755	0.000299428	0.0689245
Slc16a7	ENSMUSG00000020102	solute carrier family 16 (monocarboxylic acid transporters), member 7	-1.25338	-2.38399	0.0447422	0.252704
Klhdc8b	ENSMUSG00000032609	kelch domain containing 8B	-1.27527	-2.42045	0.0224175	0.189738
Smarca1	ENSMUSG00000031099	SWI/SNF related, matrix associated, actin dependent regulator of chromatin, subfamily a, member 1	-1.28568	-2.43798	0.0385445	0.239761
Coro2b	ENSMUSG00000041729	coronin, actin binding protein, 2B	-1.31925	-2.49536	0.0496156	0.26319
Rtn2	ENSMUSG00000030401	reticulon 2 (Z-band associated protein)	-1.32416	-2.50387	0.015811	0.167016
Tceanc	ENSMUSG00000051224	transcription elongation factor A (SII) N-terminal and central domain containing	-1.32505	-2.50542	0.0095718	0.143037
Msrb3	ENSMUSG00000051236	methionine sulfoxide reductase B3	-1.34039	-2.53219	0.0178562	0.173501
Osbpl6	ENSMUSG00000042359	oxysterol binding protein-like 6	-1.34542	-2.54104	0.00658393	0.127949
Hipk2	ENSMUSG00000061436	homeodomain interacting protein kinase 2	-1.34796	-2.54552	0.00128604	0.0932986
Ddit4l	ENSMUSG00000046818	DNA-damage-inducible transcript 4-like	-1.35104	-2.55095	0.0415846	0.244851
Mrc2	ENSMUSG00000020695	mannose receptor, C type 2	-1.35154	-2.55185	0.0119383	0.150933
P3h3	ENSMUSG00000023191	prolyl 3-hydroxylase 3	-1.3525	-2.55354	4.55365e-05	0.0400414
Zc3hav1l	ENSMUSG00000047749	zinc finger CCCH-type, antiviral 1-like	-1.36986	-2.58445	0.0142703	0.159728
B3gnt7	ENSMUSG00000079445	UDP-GlcNAc:betaGal beta-1,3-N-acetylglucosaminyltransferase 7	-1.3853	-2.61227	0.00915821	0.140692
Ints6l	ENSMUSG00000035967	integrator complex subunit 6 like	-1.38919	-2.61932	0.013455	0.156805
Iqgap2	ENSMUSG00000021676	IQ motif containing GTPase activating protein 2	-1.38986	-2.62053	0.00244268	0.102232
Fsd1l	ENSMUSG00000054752	fibronectin type III and SPRY domain containing 1-like	-1.39201	-2.62444	0.00788584	0.13311
Cldn1	ENSMUSG00000022512	claudin 1	-1.39661	-2.63282	0.0226893	0.190626
Adora3	ENSMUSG00000000562	adenosine A3 receptor	-1.39906	-2.63729	0.0346557	0.230647
Kng2	ENSMUSG00000060459	kininogen 2	-1.40033	-2.63963	0.0427577	0.247605
Rcn1	ENSMUSG00000005973	reticulocalbin 1	-1.40981	-2.65701	0.048353	0.260072
Scara5	ENSMUSG00000022032	scavenger receptor class A, member 5	-1.41176	-2.66061	0.0410047	0.244237
Slc10a5	ENSMUSG00000058921	solute carrier family 10 (sodium/bile acid cotransporter family), member 5	-1.41901	-2.67402	0.000485881	0.0777608
Ppp1r14d	ENSMUSG00000027317	protein phosphatase 1, regulatory inhibitor subunit 14D	-1.42118	-2.67804	0.0162261	0.168183
Filip1	ENSMUSG00000034898	filamin A interacting protein 1	-1.423	-2.68142	0.0118056	0.150583
Apoc1	ENSMUSG00000040564	apolipoprotein C-I	-1.43397	-2.70189	0.0028268	0.108175
Galnt18	ENSMUSG00000038296	polypeptide N-acetylgalactosaminyltransferase 18	-1.43567	-2.70508	0.00163578	0.0955347
Ppp1r3e	ENSMUSG00000072494	protein phosphatase 1, regulatory subunit 3E	-1.44229	-2.71753	0.000685413	0.0817236
Zfp462	ENSMUSG00000060206	zinc finger protein 462	-1.44659	-2.72564	0.0224185	0.189738
Slc4a5	ENSMUSG00000068323	solute carrier family 4, sodium bicarbonate cotransporter, member 5	-1.4517	-2.7353	0.0416617	0.244851
Adgrl1	ENSMUSG00000013033	adhesion G protein-coupled receptor L1	-1.45537	-2.74226	0.0254294	0.200692
Akap5	ENSMUSG00000021057	A kinase (PRKA) anchor protein 5	-1.45888	-2.74895	0.0197245	0.182466
Thbs3	ENSMUSG00000028047	thrombospondin 3	-1.46294	-2.7567	0.0125465	0.153914
Rab17	ENSMUSG00000026304	RAB17, member RAS oncogene family	-1.46838	-2.76711	0.00276709	0.106528
Fat2	ENSMUSG00000055333	FAT atypical cadherin 2	-1.46922	-2.76872	0.039414	0.241012
Mycl	ENSMUSG00000028654	v-myc avian myelocytomatosis viral oncogene lung carcinoma derived	-1.48107	-2.79156	0.0178699	0.173501
Klhl23	ENSMUSG00000042155	kelch-like 23	-1.48478	-2.79874	0.0247672	0.197726
Npr2	ENSMUSG00000028469	natriuretic peptide receptor 2	-1.5041	-2.83648	0.0283538	0.210271
Rgs5	ENSMUSG00000026678	regulator of G-protein signaling 5	-1.50569	-2.8396	0.0175188	0.171888
Arhgef25	ENSMUSG00000019467	Rho guanine nucleotide exchange factor (GEF) 25	-1.52252	-2.87292	0.00261396	0.105526
Tmem56	ENSMUSG00000028132	transmembrane protein 56	-1.52265	-2.87318	0.00295528	0.108843
Cracr2a	ENSMUSG00000061414	calcium release activated channel regulator 2A	-1.52804	-2.88393	0.00579548	0.127373
Tmem44	ENSMUSG00000022537	transmembrane protein 44	-1.52835	-2.88456	0.00355536	0.118106
Dennd5b	ENSMUSG00000030313	DENN/MADD domain containing 5B	-1.55335	-2.93498	0.00158857	0.0951534
Ak1	ENSMUSG00000026817	adenylate kinase 1	-1.56543	-2.95966	0.0346519	0.230647
Ddc	ENSMUSG00000020182	dopa decarboxylase	-1.56827	-2.9655	0.0322206	0.222087
Pdlim3	ENSMUSG00000031636	PDZ and LIM domain 3	-1.57209	-2.97334	0.046786	0.257825
Ptpru	ENSMUSG00000028909	protein tyrosine phosphatase, receptor type, U	-1.57432	-2.97795	0.0024016	0.101668
Prkd1	ENSMUSG00000002688	protein kinase D1	-1.57514	-2.97965	0.0418063	0.244979
Pnck	ENSMUSG00000002012	pregnancy upregulated non-ubiquitously expressed CaM kinase	-1.58163	-2.99308	0.0256217	0.201634
Stk26	ENSMUSG00000031112	serine/threonine kinase 26	-1.59496	-3.02086	0.00187053	0.0961914
Slc23a1	ENSMUSG00000024354	solute carrier family 23 (nucleobase transporters), member 1	-1.60624	-3.04458	0.0356783	0.232512
Smo	ENSMUSG00000001761	smoothened, frizzled class receptor	-1.61618	-3.06562	0.00869354	0.137561
Sema3a	ENSMUSG00000028883	sema domain, immunoglobulin domain (Ig), short basic domain, secreted, (semaphorin) 3A	-1.63092	-3.0971	0.011121	0.148581
Panct2	ENSMUSG00000097814	pluripotency-associated noncoding transcript 2	-1.6488	-3.13573	0.0108713	0.146792
Chml	ENSMUSG00000078185	choroideremia-like	-1.65431	-3.14772	0.00302466	0.110661
Arfgef3	ENSMUSG00000019852	ARFGEF family member 3	-1.65769	-3.15511	0.00548049	0.127159
Slco4c1	ENSMUSG00000040693	solute carrier organic anion transporter family, member 4C1	-1.66839	-3.17859	0.0133951	0.156805
Baiap3	ENSMUSG00000047507	BAI1-associated protein 3	-1.71676	-3.28697	0.00824247	0.135054
Slc2a3	ENSMUSG00000003153	solute carrier family 2 (facilitated glucose transporter), member 3	-1.73405	-3.32659	0.0318148	0.221642
Upk1a	ENSMUSG00000006313	uroplakin 1A	-1.78461	-3.44526	0.00194586	0.0961914
Sall2	ENSMUSG00000049532	spalt like transcription factor 2	-1.8006	-3.48364	0.00433049	0.123004
Scgb1c1	ENSMUSG00000038801	secretoglobin, family 1C, member 1	-1.81166	-3.51046	0.00649023	0.127949
Cys1	ENSMUSG00000062563	cystin 1	-1.81818	-3.52636	0.0173691	0.171777
Col4a4	ENSMUSG00000067158	collagen, type IV, alpha 4	-1.83897	-3.57755	0.0091459	0.140692
Daam2	ENSMUSG00000040260	dishevelled associated activator of morphogenesis 2	-1.84874	-3.60186	0.0332941	0.225872
Col14a1	ENSMUSG00000022371	collagen, type XIV, alpha 1	-1.8491	-3.60274	0.0362425	0.234654
Fgf2	ENSMUSG00000037225	fibroblast growth factor 2	-1.88803	-3.70128	0.000675755	0.0817236
Acta2	ENSMUSG00000035783	actin, alpha 2, smooth muscle, aorta	-1.90632	-3.74853	0.00165792	0.0955347
Gkn3	ENSMUSG00000030048	gastrokine 3	-1.91357	-3.76741	0.0459696	0.256007
Col4a3	ENSMUSG00000079465	collagen, type IV, alpha 3	-1.93739	-3.83013	0.00826499	0.135054
Aox3	ENSMUSG00000064294	aldehyde oxidase 3	-1.94991	-3.86351	0.00256018	0.104768
Glcci1	ENSMUSG00000029638	glucocorticoid induced transcript 1	-1.96731	-3.91037	5.47948e-05	0.0400414
Clstn2	ENSMUSG00000032452	calsyntenin 2	-1.97322	-3.92642	0.0302436	0.21727
Vipr2	ENSMUSG00000011171	vasoactive intestinal peptide receptor 2	-1.98407	-3.95608	0.0137568	0.158168
Gkn2	ENSMUSG00000030049	gastrokine 2	-1.98444	-3.9571	0.0238908	0.195249
Kcnj15	ENSMUSG00000062609	potassium inwardly-rectifying channel, subfamily J, member 15	-1.99551	-3.98758	0.0334016	0.226136
Gprin3	ENSMUSG00000045441	GPRIN family member 3	-2.03397	-4.0953	5.52491e-06	0.012209
Acoxl	ENSMUSG00000027380	acyl-Coenzyme A oxidase-like	-2.04657	-4.13123	0.0115323	0.150583
Nup62cl	ENSMUSG00000072944	nucleoporin 62 C-terminal like	-2.071	-4.20177	0.0201095	0.18378
Vcan	ENSMUSG00000021614	versican	-2.16477	-4.48395	0.00184472	0.0961914
Mboat2	ENSMUSG00000020646	membrane bound O-acyltransferase domain containing 2	-2.23782	-4.71685	0.000724854	0.0817236
Hddc3	ENSMUSG00000030532	HD domain containing 3	-2.24193	-4.73031	4.24766e-06	0.0117331
Bcan	ENSMUSG00000004892	brevican	-2.25405	-4.7702	0.0351767	0.23204
Adamts6	ENSMUSG00000046169	a disintegrin-like and metallopeptidase (reprolysin type) with thrombospondin type 1 motif, 6	-2.27581	-4.84271	0.00393349	0.120391
Apln	ENSMUSG00000037010	apelin	-2.32263	-5.00244	4.33292e-05	0.0400414
Ghrl	ENSMUSG00000064177	ghrelin	-2.3269	-5.01728	0.0130267	0.154233
Pdk4	ENSMUSG00000019577	pyruvate dehydrogenase kinase, isoenzyme 4	-2.39663	-5.26571	0.000631303	0.0805441
Rerg	ENSMUSG00000030222	RAS-like, estrogen-regulated, growth-inhibitor	-2.40255	-5.28736	0.0144775	0.160604
Tcea3	ENSMUSG00000001604	transcription elongation factor A (SII), 3	-2.46134	-5.50726	5.40996e-05	0.0400414
Spink5	ENSMUSG00000055561	serine peptidase inhibitor, Kazal type 5	-2.5127	-5.70688	0.0368436	0.236155
Pnliprp1	ENSMUSG00000042179	pancreatic lipase related protein 1	-2.56814	-5.93045	0.035161	0.23204
Rpl15-ps2	ENSMUSG00000098915	ribosomal protein L15, pseudogene 2	-2.76618	-6.80303	0.0170643	0.171403
Lce3f	ENSMUSG00000068885	late cornified envelope 3F	-2.92355	-7.58708	0.0304626	0.217886
Cubn	ENSMUSG00000026726	cubilin (intrinsic factor-cobalamin receptor)	-2.94412	-7.69607	0.0050099	0.126436
Cpne4	ENSMUSG00000032564	copine IV	-2.94926	-7.7235	0.0290116	0.212138
Rpgrip1	ENSMUSG00000057132	retinitis pigmentosa GTPase regulator interacting protein 1	-3.05376	-8.30371	0.000119498	0.048396
Zfp429	ENSMUSG00000078994	zinc finger protein 429	-3.24572	-9.48546	4.26273e-05	0.0400414
Hmgcs2	ENSMUSG00000027875	3-hydroxy-3-methylglutaryl-Coenzyme A synthase 2	-3.3189	-9.979	0.00905842	0.140692
Rps13-ps1	ENSMUSG00000066362	ribosomal protein S13, pseudogene 1	-3.98175	-15.7988	0.000932038	0.0845261
Trim31	ENSMUSG00000058063	tripartite motif-containing 31	-3.99296	-15.9221	0.0359484	0.233232
Epb42	ENSMUSG00000023216	erythrocyte membrane protein band 4.2	-4.17507	-18.0643	0.0103268	0.146135
Ugt1a6b	ENSMUSG00000090145	UDP glucuronosyltransferase 1 family, polypeptide A6B	-4.69532	-25.9079	1.57304e-10	8.69026e-07
Rps15a-ps8	ENSMUSG00000084403	ribosomal protein S15A, pseudogene 8	-5.86065	-58.1075	0.000573341	0.0777608
