# Supplementary material for: Ilusiones en el Derecho natural burgués
Source: Oxford University Press journal article supplement (doi:10.1158/0008-5472.can-20-2870), 1993-01-01
Supplement: 00085472can202870-sup-249908_4_supp_6908382_q999f9.xlsx [file 00085472can202870-sup-249908_4_supp_6908382_q999f9.xlsx]

## Sheet: TableS1-KeyResources
Key Resources Table
Reagent type (species) or resource	Source or reference	Identifiers	Additional information
Antibodies
Anti‑mouse PD‑1 (clone 29F.1A12, rat, monoclonal)	Bio X Cell	Cat# BE0273	Immunotherapy treatment
		RRID:AB_2687796	200 μg/mouse twice a week for 2 weeks
Anti‑mouse G-CSF (clone 67604, rat, monoclonal)	R&D Systems	Cat# MAB414	Anti G-CSF treatment
		RRID:AB_2085954	10 μg every day for 14 days
Anti‑GLUT1 (rabbit, polyclonal)	Millipore	Cat# 07-1401	WB
		RRID:AB_1587074	IF (1:5’000)
Anti‑GLUT1 (rabbit, monoclonal)	Abcam	Cat# ab115730	IHC (1:650)
		RRID:AB_10903230
Anti‑Histone H3 (rabbit, polyclonal)	Abcam	Cat# ab1791	WB
		RRID:AB_302613
Anti‑pHH3 (rabbit, polyclonal)	Cell Signaling Technology	Cat# 9701S	IHC (1:100)
		RRID:AB_331535
Anti‑pErk (rabbit, monoclonal)	Cell Signaling Technology	Cat# 4370S	IHC (1:400)
		RRID:AB_2315112
Anti‑S100A9 (rabbit, polyclonal)	Novus biologicals	Cat# NB110-89726	IHC (1:5’000)
		RRID:AB_1217846	IF (1:20’000)
Anti‑CD4 (clone SP35, rabbit, monoclonal)	Roche Diagnostics	Cat# 05552737001	IF
Anti‑CD8 (clone SP57, rabbit, monoclonal)	Roche Diagnostics	Cat# 05937248001	IF
Anti-mouse-CD45-BUV661 (clone 30‑F11, rat, monoclonal)	BD Biosciences	Cat# 565079	Flow cytometry
		RRID:AB_2739057
Anti-mouse/human-CD11b-BV711 (clone M1/70, rat, monoclonal)	BioLegend	Cat# 101242	Flow cytometry
		RRID:AB_2563310
Anti-mouse-Ly6G-PE (clone 1A8, rat, monoclonal)	BioLegend	Cat# 127607	Flow cytometry
		RRID:AB_1186104
Anti-mouse-Siglec‑F-PE-Vio 615 (clone REA798, human, monoclonal)	Miltenyi Biotec	Cat# 130‑112‑172	Flow cytometry
		RRID:AB_2653444
Anti-BrdU-APC (clone Bu20a, mouse, monoclonal)	BioLegend	Cat# 339808	Flow cytometry
		RRID:AB_10895898
Anti-PD-L1-BV-785 (clone 10F.9G2, rat, monoclonal)	BioLegend	Cat# 124331	Flow cytometry
		RRID:AB_2629659
Recombinant proteins
Recombinant murine G‑CSF	PeproTech	Cat# 250-05	G‑CSF treatment
			10 μg, daily injection
Recombinant murine TNF	PeproTech	Cat# 315-01A	TNF stimulation
			10 ng/ml, 4 hours
Viral vector
Ad5CMVFlpo (adenoviral vector)			University of Iowa Viral Vector Core Facility
Sequence-based reagents
Rpl30 (Mus musculus)	Thermo Fisher Scientific	Mm01611464_g1	TaqMan probe
			(Housekeeping gene)
Slc2a1 (Glut1) (Mus musculus)	Thermo Fisher Scientific	Mm00441480_m1	TaqMan probe
Slc2a3 (Glut3) (Mus musculus)	Thermo Fisher Scientific	Mm00441483_m1	TaqMan probe
Arg1 (Mus musculus)	Thermo Fisher Scientific	Mm00475988_m1	TaqMan probe
Hk2 (Mus musculus)	Thermo Fisher Scientific	Mm00443385_m1	TaqMan probe
Siglecf (Siglec5) (Mus musculus)	Thermo Fisher Scientific	Mm00523987_m1	TaqMan probe
Ikbke (Mus musculus)	Thermo Fisher Scientific	Mm00444862_m1	TaqMan probe
Apoe (Mus musculus)	Thermo Fisher Scientific	Mm01307193_g1	TaqMan probe
Pfkp (Mus musculus)	Thermo Fisher Scientific	Mm00444792_m1	TaqMan probe
Cxcl3 (Mus musculus)	Thermo Fisher Scientific	Mm01701838_m1	TaqMan probe
Grx1 (Mus musculus)	Thermo Fisher Scientific	Mm01352826_g1	TaqMan probe
Il23a (Mus musculus)	Thermo Fisher Scientific	Mm00518984_m1	TaqMan probe
Padi4 (Mus musculus)	Thermo Fisher Scientific	Mm01341658_m1	TaqMan probe
Csf3 (G-CSF) (Mus musculus)	Thermo Fisher Scientific	Mm00438334_m1	TaqMan probe
Chemicals
Isoflurane	Piramal	Cat# 56.761.002	Anaesthetic
BrdU	Merck	Cat# 10280879001	BrdU assay
			2 mg of freshly prepared BrdU into 100 μl of PBS 1X
Glucose	VWR	Cat# 1.08337.0250	Seahorse
			10 mM glucose
2‑deoxyglucose (2‑DG)	Merck	Cat# D8375-5G	Seahorse
			50 mM 2‑DG
Crystal violet	Merck	Cat# C3886
Experimental Models: Cell lines
B16-F1 (Mus musculus)		RRID:CVCL_0158	Melanoma lung metastases
SV2 (Mus musculus)			Developed in our laboratory
Experimental Models: Organism/Strains
KrasLox-STOP-Lox-G12D/WT (K)	The Jackson Laboratory	RRID:IMSR_JAX:008179	KrasLoxSTOPLox‑G12D/WT
			K and P were interbred at EPFL
Tp53Flox/Flox (P)	The Jackson Laboratory	RRID:IMSR_JAX:008462	Trp53Flox/Flox
			K and P were interbred at EPFL
KrasFrt-STOP-Frt-G12D/WT (KFrt)	The Jackson Laboratory	RRID:IMSR_JAX:008653	KPFrt were provided by D.G. Kirsch, Duke University Medical Center in a mixed 129-C57BL/6 background
Tp53Frt/Frt (PFrt)	The Jackson Laboratory	RRID:IMSR_JAX:017767	KPFrt were provided by D.G. Kirsch, Duke University Medical Center in a mixed 129-C57BL/6 background
Glut1Flox/Flox (G1)	The Jackson Laboratory	RRID:IMSR_JAX:031871	Glut1Flox/Flox were provided by E. Dale Abel, University of Iowa in a C57BL/6 background
Glut3Flox/Flox (G3)			Duke University Transgenic Facility
Ly6gCre (Catchup)			Ly6gCre (Catchup) were provided by M. Gunzer, University Duisburg-Essen, in a C57BL/6 background
KrasFrt-STOP-Frt-G12D/WT; Tp53Frt/Frt; Ly6gCre/WT; Glut1Flox/Flox			G1, Ly6gCre and KPFrt mice were interbred at EPFL
KrasFrt-STOP-Frt-G12D/WT; Tp53Frt/Frt; Ly6gWT/WT; Glut1Flox/Flox			G1, Ly6gCre and KPFrt mice were interbred at EPFL
KrasFrt-STOP-Frt-G12D/WT; Tp53Frt/Frt; Ly6gCre/WT; Glut1WT/WT			G1, Ly6gCre and KPFrt mice were interbred at EPFL
Commercial assays and kits
Anti-mouse CD45 MicroBeads (clone 30F11.1, monoclonal)	Miltenyi Biotec	Cat# 130-052-301	CD45 magnetic cell sorting
		RRID:AB_2877061)
Anti-mouse Ly‑6G MicroBead (monoclonal)	Miltenyi Biotec	Cat# 130-092-332	Ly‑6G magnetic cell sorting
Anti-mouse Ly‑6G MicroBeads UltraPure (clone REA526, monoclonal)	Miltenyi Biotec	Cat# 130-120-337	Ly‑6G magnetic cell sorting
Centricon Plus-70 Centrifugal Filter (3 kDa cutoff)	Merck	Cat# UFC700308	Size exclusion separation of proteins
High‑Capacity cDNA Reverse Transcription Kit	Thermo Fisher Scientific	Cat# 4368814	Reverse transcription
BCA Protein Assay Kit	Merck	Cat# 71285-3	Protein quantification
CountBright™ Absolute Counting Beads	Thermo Fisher Scientific	Cat# C36950	Flow cytometry
Anti‑rabbit Immpress HRP (horse)	Vector Laboratories	Cat# MP‑7401	Peroxidase Polymer Detection Kit
		RRID:AB_2336529
Rhodamine-6G	Roche Diagnostics	Cat# 07988168001	TSA kit
DCC	Roche Diagnostics	Cat# 07988192001	TSA kit
Red 610	Roche Diagnostics	Cat# 07988176001	TSA kit
Cyanine 5	Roche Diagnostics	Cat# 07551215001	TSA kit
Glucose-uptake cell-based assay kit	Cayman Chemical	Cat# CAY-600470-1	Glucose Uptake Cell-Based Assay Kit
CellTiter-Glo® Luminescent Cell Viability Assay	Promega	Cat# G7570	ATP production
Software and Algorithms
Analyze 12.0	PerkinElmer		Tumor volume analysis
OsiriX MD	Pixmeo	RRID:SCR_013618	Tumor volume analysis
QuPath		RRID:SCR_018257
Fiji		RRID:SCR_002285
FlowJo		RRID:SCR_008520	Flow cytometry
GraphPad Prism		RRID:SCR_002798
(version 6)
Instruments
X‑Ray microtomography	PerkinElmer		Quantum FX microCT
20 mm2 collimator			Radiotherapy treatment
			13 mA, 3 mm Cu filter, 225 keV
			11.6 Gy with a single dose in 256 seconds
Automated Ventana Discovery ULTRA	Roche Diagnostics		Human sample multiplexing
Olympus slide scanner	Olympus	VS120-L100	Slide scanner
XF96 Extracellular Flux analyser	Seahorse Bioscience	XF96	Seahorse
LSRII SORP	Becton Dickinson		Flow cytometry
